# Supplementary material for: Reprogramming homing endonuclease specificity through computational design and directed evolution
Source: PubMed Central journal article supplement (PMC3936771; doi:10.1093/nar/gkt1212), 2013-11-21
Supplement: supp_gkt1212_nar-01480-v-2013-File009.pdf [file supp_gkt1212_nar-01480-v-2013-File009.pdf]

## Supplementary Information

### Contents:

#### *Supplementary Methods*

#### *Supplementary Figures*

- Figure S1. Control experiments for bacterial selection system and new negative selection component.
- Figure S2. Cleavage data for each newly selected endonuclease collected with *in vitro* assays.
- Figure S3. Examples of the strong hydrogen bonds in selected and designed I-AniI variants with high specificity.
- Figure S4. Computational specificity prediction for the I-AniI wild-type endonuclease.
- Figure S5. Detailed comparison of experimental and fixed-backbone computational specificities for the I-AniI wild-type endonuclease.
- Figure S6. Specificity prediction and recovery of engineered amino acids for selected I-AniI variants targeting single base-pair substitutions.
- Figure S7. Two computationally derived endonucleases targeting single base-pair changes can be combined without further optimization.
- Figure S8. Cleavage data for endonucleases targeting multiple base-pair pockets and full sites in genes of interest.
- Figure S9. Endonucleases targeting the (+) half-site changes in two mosquito sites show activity in human cells.
- Figure S10. Evidence for a role of C-terminal loop 190-199 in formation of the ground-state reaction complex.
- Figure S11. Mutations from I-AniI homologues that alter catalysis and binding.

#### *Supplementary Discussion A. Rosetta computational predictions of experimental data.*

#### *Supplementary Discussion B. Improving the binding affinity of I-AniI.*

#### *Supplementary Tables*

- Table S1. Activities, specificities, starting libraries, bacterial survivals, and computational predictions for all I-AniI variants shown in Figure S2 that target single base-pair substitutions.
- Table S2. Activities, specificities, starting libraries, and bacterial survivals for enzymes cleaving multiple base-pair pockets and full sites in genes of interest.

## Supplementary Methods

Example target site primers with NheI and SacII sticky ends for building the pCcdB vector for single base-pair substitution selection:

Top primer, two copies of wild-type I-AniI LIB4 site:

ctagcTGAGGAGGTTaCTCTGTtAAgatacTGAGGAGGTTaCTCTGTtAAccgc

Bottom primer, two copies of wild-type I-AniI LIB4 site:

ggTTaACAGAGtAACCTCCTCAgtatcTTaACAGAGtAACCTCCTCAg

Top primer, -6C substitution:

ctagcTGAGcAGGTTaCTCTGTtAAgatacTGAGcAGGTTaCTCTGTtAAccgc

Primers used for amplifying the pCcdB plasmid to generate substrates for enzyme assays and for sequencing from pCcdB and pENDO-HE:

pEndo-SEQ-REV, AATGCTCTGCCAGTGTTACAACCA

pEndo-SEQ-FWD, CGGCGTCACACTTTGCTATG

pCcdB-SEQ-REV, TGCTGAAGCCAGTTACCTTCG

pCcdB-SEQ-FWD, CGAAGTGATCTTCCGTCACAGG

pCcdB-AMP-REV, CCCGACAGGACTATAAAGATAACCAGGC

pCcdB-AMP-FWD, GAATCCGGATGAGCATTCATCAGGC

Target site arrays:

Array containing a multiple base-pair substitution from the **CPK2 (-) half-site**, **CPK2 (+) half-site**:

```
TGAGGAGGTTTCatTGTA   GCG
TGAGctGcTTTCTCTGTAA  TAGT
TGAGGAGGTTaCTggGTAA  CCCAG
TGAGccctTTTCTCTGTAA  AGT
TGAGGAGGTTTCTCacaAAA  CTTATG
TGAGtAtGTTgCTCTGTAA  GGCAGG
TGAGGAGGTTTCTtTccAcA  GCTC
TGAGttGGTTTCTCTGTAA  ATCCA
TGAGGAGGTTgCcCacaAAA  TTAGC
TGAGcAtGTTTCTCTGTAA  GTCT
TGAGGAGGTTTCTCTccAAA  GGTG
TGAGGccaTTgCTCTGTAA  CTTCTC
TGAGGAGGTTgCTtctTcc  AACG
gctGGAGGTTTCTCTGTAA  ACACGG
TGAGGAGGTTctTCTGaccA  GAA
TGAGtctGTTaCTCTGTAA
```

Array containing **CPK2 (-) half-site**, a multiple base-pair substitution region from the **FAH1313 (+) half-site**, **CPK2 (+) half-site**, and FAH1313 (+) half-site:

```
TGAGGAGGTTTCTCccTAA  GCG
ccAGtAtGTTgCTCTGTAA  TAGT
TGAGGAGGTTTCCcCccTA  CCCAG
TGAGcAtGgTaCTCTGTAA  AGT
TGAGGAGGTTaCTggGgAcc  CTTATG
cGtGGccaTTgCTCTGTAA  GGCAGG
TGAGGAGGTTgCcCTGgAcA  GCTC
gctGctGcTTTCTCTGTAA  ATCCA
TGAGGAGGTTTCTCTGaccA  TTAGC
```

TGAGGAGGTTaCTaTGtTTA GTCT  
gGtGGttGcTTCTCTGTAAA GGTG  
TGAGGAGagTTCTCTGTAAA CTCTC  
aGtGttGcTTTCTCTGTAAA AACG  
TGAGGAGGTTTcATGccAA ACACGG  
TGAGGttGcTTCTCTGTAAA GAA  
TGAGGAGGTTgCTtctTAAA

### Array containing the **CPK2** and **FAH1313** full target sites:

TcCctCTTATTCAACCTTTT GCG  
TGAGccctTTcCcCccTAgc TAGT  
TGAGcAtGgTaCTggGgAcc CCCAG  
TTCCACTTATTCCctgCagcT AGT  
gctGctGcTTctTCTGaccA CTTATG  
TGAGtctGTTaCTaTGtTTA GGCAGG  
gGtGGttGcTTCTtTccAcA GCTC  
aGtGGtGGTTgCTtctTtcc ATCCA  
TTCCACTTATTCAACCagcT TTAGC  
gGtGGgtGcTaCTCctaAtg GTCT  
TGAGGAGGTTaCTCctaAtg GGTG  
gGtGGgtGcTaCTCTGTAAA CTCTC  
TcCctCTTATTCCctgCagcT AACG  
cGtGGccaTTgCcCTGgAcA ACACGG  
aGtGttGcTTTcATGccAA GAA  
TTCCACTTATTCCctgCTTTT

### Two arrays containing AGAP half- and full- sites:

|                            |                            |
|----------------------------|----------------------------|
| aGAGGcGGTTTCTCgcTAcg ACGT  |                            |
| gGcGGAcGTTTCTCTGTAAA TATCG |                            |
| TGAGGAGGTTTCTaTgcAAA CGAT  |                            |
| TGgGgtGcTTcCTtCgTAAc GTACA |                            |
| TGAGGAGGTTcCcCaGtAgc GATC  |                            |
| gGtGGcGGTTTcATtCtAa AACTG  |                            |
| gGtGGcGtcTTCTGgGTgAA ATCG  |                            |
| gGAGGtGaTTgCcCTGTAcA TACGC |                            |
| TGAGGAGGTTTcATtAgg GATC    |                            |
| aGAGGAtGcTTCTaTgcAgg TACGT |                            |
| TGAGGAGGTTgCgCTGTtga ATAC  |                            |
| cGAGGAGGcTTCaCTtCtAt CGATA |                            |
| cGgGGgcGTTTCTCTGTAAA GATC  |                            |
| cGAGGcGcgTTCTCTGTAAA TAGAA |                            |
| TGAGGAGGTTTCTgaGTtgc GCGAT |                            |
| cGAGGtGgATTTCTCTGTAAA      |                            |
|                            | cGgGGgcGTTgCgCTGTtga ACGT  |
|                            | cGAGGcGcgTTCTaTgcAAA TATCG |
|                            | TGgGgtGcTTTCTCTGTAAA CGAT  |
|                            | gGcGGAcGTTTCTgaGTtgc GTACA |
|                            | gGAGGAGaTTcCcCaGtAgc GATC  |
|                            | gGAGGtGaTTTCTCTGTAAA AACTG |
|                            | TGAGGAGGTTTCTgGTgAA ATCG   |
|                            | cGAGGtGgATTCaTtCtAgg TACGC |
|                            | aGAGGAtGcTTCTCTGTAAA GATC  |
|                            | TGAGGAGGTTTcATtTcAt TACGT  |
|                            | TGAGGAGGTTTCTaTgcAgg ATAC  |
|                            | TGAGGAGGTTTcATtCtA CGATA   |
|                            | TGAGGAGGTTcCTtCgTAAc GATC  |
|                            | gGtGGcGtcTTCTCTGTAAA TAGAA |
|                            | TGAGGAGGTTTCTCgcTAcg GCGAT |
|                            | TGAGGAGGTTgCcCTGTAcA       |

### Sequences of vectors:

#### pENDO-HE, containing wild-type I-AniI sequence between NcoI and NotI sites:

GTTGACGCCGGGCAAGAGCAACTCGGTCGCCGCATACACTATTCTCAGAATGACTTGGTTGAGTACTCACCAGTCACAGAAAAGCATCTTACGGATG  
GCATGACAGTAAGAGAATTATGCAGTGTGCCATAAACCATGAGTGATAAACTGCGGCCAACTTACTTCTGACAACGATCGGAGGACCGAAGGAGCT  
AACCGCTTTTTTGCACAACATGGGGGATCATGTAACCTGCCTTGATCGTTGGGAACCGGAGCTGAATGAAGCCATACCAAACGACGAGCGTGACACC  
ACGATGCCTGCAGCAATGGCAACAACGTTGCGCAAACTATTAACCTGGCGAACTACTTACTCTAGCTTCCCAGCAACAATTAATAGACTGGATGGAGG  
CGGATAAAGTTGCAGGACCCTTCTGCGCTCGGCCCTTCCGGCTGGCTGGTTTTATTGCTGATAAAATCTGGAGCCGGTGAGCGTGGGTCTGCGGTAT  
CATTCAGCACTGGGCCCAGATGGTAAGCCCTCCCGTATCGTAGTTATCTACACGCGGGGAGTCAGGCAACTATGGATGAACGAAAATAGACAGATC  
GCTGAGATAGGTGCCCTACTGATTAAGCATTGGTAACGTGCAGACCAAGTTTACTCATATATACTTTAGATTGATTTAAAACCTCATTTTTTAATTTA  
AAAGGATCTAGGTGAAGATCCTTTTTGATAATCTCATGACCAAAATCCCTTAACGTGAGTTTTCTGTTCCACTGAGCGTCAGACCCCTTAATAAGATG  
ATCTTCTGAGATCGTTTTGGTCTGCGGTAATCTCTGCTGAAAACGAAAACCGCCTTGCAAGGCGGTTTTTCGAAGGTTCTCTGAGCTACC  
AACTCTTTGAACCGAGGTAACCTGGCTTGGAGGAGCGCAGTCACCAAACTTGTCTTTTCAAGTTAGCCTTAACCGGCGCATGACTTCAAGACTAACT  
CCTCTAAATCAATTACCAGTGGCTGCTGCCAGTGGTGTCTTTTGCATGTCTTTCCGGTGGACTCAAGACGATAGTTACCGGATAAGGCGCAGCGGT  
CGGACTGAACGGGGGTTCTGTCATACAGTCCAGCTTGGAGCGAATGCCTACCCGGAACTGAGTGTGAGGCGTGAATGAGACAAAACCGGCCATA  
ACAGCGGAATGACACCGGTAACCGAAAAGGCAAGGAGAGCGCAGGAGGCGCCAGGGGGAACCGCTGGTATCTTTATAGTCTCTGTCGG  
GTTTTCCGCCACCACTGATTTGAGCGTCAGATTTCTGTATGCTTGTGAGGGGGCGGAGCCATGGAAGAAACCGCTTTGCCCGGCCCTCTACTTCCC  
TGTTAAGTATCTTCTGGCATCTTCCAGGAAATCTCCGCCCGTTCGTAAGCCATTTCCGCTCGCCGAGTCGAACGACCGGAGCGTAGCGAGTCACT  
GAGCGAGGAAGCGGAATATATCTGTATACATATTCTGTGACGACCGGTCAGCCTTTTTTCTCTGCCATGAAGCACTTCACTGACACCTT

CATCAGTGCCAACATAGTAAGCCAGTATACACTCCGCTAGCGCTGAGGCTGCTGCTCGTGAAGAAGGTGTTGCTGACTCATACCAGGCCTGAATCGCC  
CCATCATCCAGCCAGAAAGTGAGGGAGCCACGGTTGATGAGAGCTTTGTTGTAGGTGGACCAGTTGGTGATTTTGAACCTTTTGCTTTGCCACGGAA  
GGTCTGCGTTGTGGCATTGCGCATAAATGCTGCTGCGCAGGTGATGCTGACTGACAGCTTCTGCAAAACCTTATGCTTCCGTCAGCCGCTCAATGCTC  
ATTCGTTACCAATATGACAACCTGACGGCTACATCATTACTTTTTCTTCAACAACCGGCACGGAACCTGCTCGGGCTGGCCCCGGTGCATTTTTTA  
AATACCCGCGAGAAATAGAGTTGATCGTCAAAACCAACATTGGGACCGACGGTGGCGATAGGCATCCGGGTGGTGCTCAAAGCAGCTTCGCCTGGC  
TGATACGTTGGTCTCGGCCAGCTTAAGACGCTAATCCCTAACTGCTGGCGGAAAAGATGTGACAGACGCGACGGCGGACAAGCAAACATGCTGTG  
GACGCTGGCGATATCAAAATGCTGCTGCGCAGGTGATGCTGACTGACAGCTTCTGCAAAACCTTATCCATCGGTGGATGGAGCGGACTCG  
TTAATCGTTCCATGCGCCGAGTAACAATGCTCAAGCAGATTTATCGCCAGCAGCTCCGAATAGCGCCCTTCCCTTGGCCGGCTTAATGATTT  
GCCAAACAGGTGCTGAAATGGGCTGGTGGCTTTCATCCGGGCGAAAGAACCCCGTATTGGCAAATATTGACGGCCAGTTAAGCCATTCATGCCA  
GTAGGCGCGGGACGAAAGTAAACCCACTGGTGATACCAATTCGCGAGCCTCCGGATGACGACCGTAGTGATGAATCTCTCTGGCGGAAACAGCAAA  
ATATCACCCGCTGGCAAAACAAATCTCTGCTCCGTGATTTTTCCACCACCCCTGACCGGAAATGGTGAGATTGAGAATAAACCTTTTCAATCCAGCG  
GTCGGTGCATAAAAAATCGAGATAACCGTTGGCCTCAATCGCGTTAAACCCGCCACAGATGGGCATTAACAGGATATCCCGGACGACGGGATC  
ATTTTGGCTTCAGCCATACTTTTCATACTCCCGCCATTCAGAGAAGAAACCAATTTGCCATATTGCATCAGACATTGCCGTCACTGCGTCTTTTAC  
TGCTCTTCTCGTAAACAAACCGGTAACCCCGCTTATTAAGAGCATTTCTGTAACAACGGGACCAAGCCATGACAAAAACGCGTAACAAAAGTG  
TCTATAATCAGCGCAAAAGTCCACATGATTTATTTGACCGCGCTCACACTTTGCCATAGCATTTTTATCCATAAGATTAGCGGATCCCTAC  
CTGACGCTTTTTTACGAACTCTCTACTGTTTTCTCCATCCGCTTTTTTGGCTAGAAATAATTTTTGTTAACTTTAAGAAGGAGATATACCCATG  
GGATCCGATTTACATATGCCTACCTGGTAGGATTGTTGCAAGGTGATGGTTATTTTCCATTACAAAGAAAGGTAAGTATCTGACCTATGAGCTGG  
GTATTGAGCTGTCAATTAAGGATGTACAATGATTTACAAGATCAAGAAGATTCTGGGAATTGGTATTGTAAGTTTTTCGCAACGCAATGAGATCGA  
GATGGTAGCCCTGGCATCCCGGACAAGAACCATCTGAAAAGTAAATTTGCTTATCTTTGAGAAATATCCCATGTTCTCTAATAAGCAATATGAC  
TATCTGCATAAAAAATCGAGATAACCGTTAGGCTTATTTCTGAAAGTATGCTTCCATGATTTATCTGCAAGTATGATTTATCTGCAAGTATGAGT  
CGATTATCAACACATCTTACTTCTGCTGGCTGGTAGGCTTTATCGAAGCTGAAAGTTGTTTTCAGCGTTTACAACCTGAACAAAGATGATGATTA  
CCTGATCGCTAGTTTTGATATTGCTCAACGCGATGGGATATTTCTGATCTCAGCCATCCGTAATACTGTCTTTCCTACTAAAGTTTACCTGGAT  
AAAATAACTGTTCAAGCTGAAAGTTACAAGTGTACGCTCAGTAGACACATCATTAAGTTCTTGCAAAACGACCTGTAATAACTGCTGGGTAACA  
AGAGCTGCAATTAAGTGAAGTGGCTGAAACAGCTGCGTAAGATCTCTGACTCATAGAAAGATCAAGATCCCTTCAAGCTAAGCTGAGGCGGCTCA  
GAATTGGTTAATGGTTGAACACTGGCAGAGCATTACGCTGACTTGACGGGACGGCGGCTTTGTTGAATAAATCGAACTTTTCTGAGTTGAAGGA  
TCAGATCAGCATCTTCCCGACACGACAGCCGTTCCGTTGGCAAGGCAAAAGTTCAAATACCAACTGGTCCACCTACAACAAAGCTCTCATCAAC  
CGTGGCTCCCTCACTTTCTGGCTGGATGATGGGGCATTGAGGCTGGTATGAGTCAGCAACACCTTCTTACGAGGACAGCCCTCAGCGCTCAAGA  
TGCAGGGGTAAGGCTTTCGCAACCGGAAATTTACCGACAAGGATCCCGGCTTCAACAGATCCGGAAGGGCTGGATTTCGAGGATGAGGCGGAGAA  
GGTGTATGCTATTCTGGTGAAGAAGCTCGACCGTCTTGGCCGACACCGCCGACATGATCCAATGATAAAAGAGTTTGTGCTCAGGGTGTAGCGG  
TTCCGTTTATTGACGACGGGATCAGTACCGACGGTGTATGGGGCAATGGTGGTCAACATCTGTCCGCTGTGGCAGAGGCTGAACCCGGAGGAT  
CCTAGAGCGCAGAAATGAGGGCCGACAGGAAGCAAAGCTGAAAGGAAATCAAATTTGGCCCGAGGCGTACCCTGGACAGGAACGTCGTGCTGACGCT  
CATCAGAAGGGCTTTCGCAACCGGAAATTTACCGACAAGGATCCCGGCTTCAACAGTATGCTTCCCGCTCCACGGTTTATAAAATTTTGAAGACGAAAGGCGCTCGTGAT  
ACGCTATTTTTATAGTTAATGTGATGATAAATAAGTTTCTTAGACGTCAGGTGGCACTTTTCGGGAAATGTGCGCGGAACCCCTATTTGTTTA  
TTTTTCTAAATACATTCAAATATGATCCGCTCATGAGACAATAACCTGATAAATGCTTCAATAATATTGAAAAGGAGAGATATGAGTATTCAC  
ATTTCCGTGTCCGCTTATCCCTTTTTTGGCGCATTTTGCCTTCTGTTTTTGCTCACCCAGAAACGCTGGTGAAGTAAAGATGCTGAAGATCA  
GTTGGGTGCACGAGTGGTTACATCGAACTGGATCTCAACAGCGGTAAAGTCTTGAAGTTTTTCGCCCGAAGAAGCTTTTCCAATGATGAGCACT  
TTTTAAG

## pCcdB, containing wild-type I-AniI target site between NheI and SacII:

ATCGATGCATAATGTGCTGGAGCTGCGCAACGCAATTAATGTGAGTTAGTCACTCATTAGGCACCCAGGCTTTACACTTTATGCTTCCGGCTC  
GTATGTTGTGGAATTTGTGAGCGAATAACAATTTACACAGGAAACAGCTATGACCATGATTACGCCAAGCTATTTAGGTGACACTATAGAATACT  
CAAGCTATGCATCAAGCTTGGTACCGAGCTCGGATCCACTAGTAACGGCCGCCAGTGTGCTGGAATTTGTCAGATATCCATCACACTGGCGGCGCT  
CGAGCATGCATCTAGAGGGCCCAATTCGCCCTATTCGAAGTCTGATTTACAATTCACCTGGCCGCTGTTTTACAACGTCGTGACTGGGAAAACCCCTGGC  
GTTACCCAACCTTAATCGCCTTTCAGGCACATCCCCCTTTTCGCGAGCTGGCGTAAATAGCGAAGAGGGCCGACCCGATCGCCCTTCCCAACAGTTGCGCA  
GCCTATACGTAACCGCAGTTTAAAGTTTTACACCTATAAAAAGAGAGAGCGTTATCTGCTGTTTTGTTGGATGATACAGAGATATTTGACACGCGCGG  
GCGACGGATGGTATCCCCCTGGCCAGTGCACGCTGCTGCTGTCAGATAAAGTCTCCCGTGAACTTTACCCGGTGGTGATATCGGGGATGAAAGCTGG  
CGCATGATGACCACCGATATGGCCAGTGTCCCGTCTCCGTTATCGGGGAAGAGTGGCTGATCTCAGCCACCGCGAAAATGACATCAAAAACGCCA  
TTAACCTGATGTTCTGGGGAATATAAGGCGCCCTTTACAAAAATCAGATAAACGCTGTAGATCTCGGATCAACGCCATGAGCGGCCCTCATTCTTTA  
TTCTGAGTTACAACAGTCCGCAACCGCTGTCCGATAGCTCCTTCCGGTGGCGCGGGGATGACTATCGTCGCCGCACTATGACTGCTCTCTTTATC  
ATGCAACTCGTAGGACAGGTGCCGCGACGCCAACAGTCCCCCGCCACGGGCGCTGCCACCATACCCACGCCGAAACAAGCGCCCTGCACCATTA  
TGTCCGGATCTGCATCGCAGGATGCTGCTGGTACCTGTGGAACACCTACATCTGTATTAAACGAAGCGCTAACCGTTTTTATCAGGCTCTGGGAG  
GCAGAATAAATGATCATATCGTCAATTAATACCTCCACGGGAGAGCCTGAGCAAACCTGGCCTCAGGCATTTGAGAAGCACACGGTCACTGCTCTC  
CGGTAGTCAATAAACCCGTAACCGCAGCAATAGACATAAAGCGGATTTTAAACGACCTGCCCTGAACCGACGACCGGGTCAATTTGCTTTGCAATTT  
CTGCCATTCATCCGCTTATATCACTTATTCAGGCGTAGCACCAGGCGTTTAAAGGCAACAAATACCTGCTTAAAAAATACGCCCGCCCTGCCA  
CTCATCGCAGTACTGTTGTAATTCATTAAGCATTTCTGCCGACATGGAAGCCATCACAGACGGCATGATGAACCTGAATCGCCAGCGGATCAGCACC  
TTGTCGCCCTTGGCTATAATATTTGCCATGGTAAAACGGGGCGAAGAAGTTGCTCATTTGGCCACGTTTAAATCAAACTGGTGAACCTCACC  
AGGATTTGGCTGAGACGAAAAACATATTTCTCAATAAACCTTTAGGGAATAGGCCAGTATTTAGCCCTGCCCTGAACCGACGACCGGGTCAATTTGCTTTGCAATTT  
TAGAAACTGCCGAAATCGTCTGGTATTCTCACCAGAGCGATGAAAACGTTTTCAGTTTGTCTCATGAAAAACGGTGTAAACAGGGTGAACACTATCC  
CATATCACCAGCTACCGTCTTTTCATTGCCATACGGAATTCGGATGAGCATTCATAGGCGGGCAAGAATGTGAATAAAGGCGGATAAAACCTGT  
GCTTATTTTTCTTACGGTCTTTAAAAAGGCGGTAATATCCAGCTGAACGCTGCTGTTATAGGTACATTTGAGCAACTGACTGAAATCGCTCAAATG  
TTCTTTACGATGCCATATACCAACGGTGGTATATCAACGGTGGTATTTTTTCTCAATTTTACCTTTAGCTTCCCTTAGCTGAAATCTGCAATCTT  
ATTTCAATATGGTGAAGTTGGAACCTCTACGTGCCGATCAACGCTCTCATTTTTGCCAAAAGTTGGCCAGGGCTTCCCGGATCAACAGGGACAC  
CAGGATTTATTTATCTGCAAGTGTCTCCGTCACAGGATTTATTCGGCCAAAGTGGCTCGGGTGTGCTGCCAACTTACTGATTTAGTGTAT  
GATGGTGTTTTTGAGGTGCTCCAGTGGCTTCTGTTTCTATCAGCTTCTCTCTGTTTCACTACTGACGGGGTGGTGGCTAACGGCAAAAAGCACCGC  
CGGACATCAGCGCTAGCTGAGGAGGTTTTCTCTGTAATGAGGAGTTTCTCTGTAACCGCGGAGACAGATCGCTGAGATAGGTGCTCACTGATTAAG  
CATTGGTAACTGTGACACCAAGTTTACTCATATATACTTTAGATTGATTTAAACTTCATTTTTAATTTAAAGGATCTAGGTGAAGATCCTTTTTG  
ATAATCTCATGACCAAAATCCCTAACGTGAGTTTTCTGTTCCACTGAGCGTACAGCCCGTAGAAAAGATCAAGGATCTTCTTGAAGATCCTTTTTT  
TCTGGCGTAATCTGCTGCTTGCAAAACAAAAAACCCGCTACCAGCGGTGGTTTTGTTTGGCGGATCAAGAGCTACCAACTCTTTTTCCGAAGGTA  
ACTGGCTTCAGCAGAGCGCAGATACCAATACTGTCTTCTAGTGTAGCCGTAGTTAGGCCACCCTCAAGAACTCTGTAGCACCAGCTTACATACC



## Computational modeling

### Specificity prediction

Specificity was calculated with the publicly available application rosettaDNA (26, 61). For these calculations, the variant sequence (or wild-type sequence) was modeled with each of the four possible nucleotides at the DNA position of interest and the total energy of the complex was computed. Residues in a 6 Å region (defined by the `z_cutoff` flag in the command line arguments) surrounding the target base-pair were allowed to repack, meaning they could change in conformation but not in sequence. A total of 56 models were predicted for each nucleotide, and the average energy over all 56 was used in the specificity calculation. Specificity was defined for the computational models by the Boltzmann weight of the specific complex, as follows and as in previous work (21, 26, 61):

$\text{Specificity}_n = [e^{-(E_n - E_{\text{target}}) / k_B T}] / \sum [e^{-(E_n - E_{\text{target}}) / k_B T}]$ , where the sum is over the quantity in the numerator for all four bases. The value of  $k_B T$  was set to 1 based on previous work correlating Rosetta Energy Units (REUs) with kcal/mol (62).

For example, the predicted energies of the models for a single run of the -8G\_P1 variant are -727.782 for an adenine substitution, -725.740 for cytosine, -729.516 for guanine, -713.981 for thymine. The calculation of specificity for adenine is as follows:

$\text{Specificity}_{\text{ade}} = [e^{-( -727.782 + 729.516 ) / 1}] / ([e^{-( -727.782 + 729.516 ) / 1}] + [e^{-( -725.740 + 729.516 ) / 1}] + [e^{-( -729.516 + 729.516 ) / 1}] + [e^{-( -713.981 + 729.516 ) / 1}])$   
= 0.147 for adenine (and if the calculation is repeated for the other bases: 0.019 for cytosine, 0.8336 for guanine, and 1.49E-07 for thymine)

### Design calculation

In order to assess whether the computational design methods could recover selected amino acids, design was completed for all single base-pair substitutions in the I-AniI target site. The designed amino acids were compared to the amino acids derived from selection for the same base-pair substitutions. The motif-biased design data were collected with the `motif_dna_packer_design` application (33). However, this version of the protocol is written with trunk Rosetta and includes some minor changes over the trunk version previously described (33) improved the results, making them more closely resemble the optimal results achieved with the protocol used for the majority of the previous work (33). For example, an orientation-dependent desolvation term that has been described (33, 63) is included in the energy function used in this work, whereas it was previously not available in trunk Rosetta.

Calculations were carried out using the structures 2qoj and chain A of 3eh8 as starting scaffolds. Residues in a 6 Å region surrounding the target base-pair were allowed to design. As in past work, if the variant amino acid was in the top three amino acids by frequency in the set of 56 repeated design runs, then the position was considered successfully redesigned (33). For the few variants with loop length changes the predictions did not incorporate loop-modeling steps, and

instead the sequence of the region was aligned and only the relevant interface positions were allowed to design or were substituted to generate the model used in specificity prediction.

Energy function and command lines used for design and specificity prediction, all flags are described in detail in reference 33:

Energy function:

Weight set:

```
METHOD_WEIGHTS ref -0.3 -0.7 -0.75 -0.51 0.95 -0.2 0.8 -0.7 -1.1 -0.65 -0.9  
-0.8 -0.5 -0.6 -0.45 -0.9 -1.0 -0.7 2.3 1.1
```

```
special_rot 1.0  
fa_atr 0.95  
fa_rep 0.44  
fa_sol 0.65  
fa_intra_rep 0.004  
hack_elec 0.5  
fa_plane 0  
fa_dun 0.56  
ref 1  
hbond_lr_bb 1.17  
hbond_sr_bb 1.17  
hbond_bb_sc 1.17  
hbond_sc 1.17  
lk_ball 0.325  
lk_ball_iso -0.325  
p_aa_pp 0.64  
dslf_ss_dst 0.5  
dslf_cs_ang 2  
dslf_ss_dih 5  
dslf_ca_dih 5  
pro_close 1.0
```

To go with this optimized weight set, the `atom_properties` and `lys.params` files are modified exactly as described in the supplement of previous work on protein-DNA design (33). These modifications to the `atom_properties` (more important than lysine changes) are as follows:

|      |   |        |        |          |        |         |                              |
|------|---|--------|--------|----------|--------|---------|------------------------------|
| Phos | P | 2.1500 | 0.5850 | -4.1000  | 3.5000 | 14.7000 |                              |
| Narg | N | 1.7500 | 0.2384 | -10.0000 | 6.0000 | 11.2000 | DONOR ORBITALS               |
| NH2O | N | 1.7500 | 0.2384 | -7.8000  | 3.5000 | 11.2000 | DONOR ORBITALS               |
| Nlys | N | 1.7500 | 0.2384 | -16.0000 | 6.0000 | 11.2000 | DONOR                        |
| ONH2 | O | 1.5500 | 0.1591 | -5.8500  | 3.5000 | 10.8000 | ACCEPTOR SP2_HYBRID ORBITALS |

Command line arguments used for design with `motif_dna_packer_design` application:

```
-dna::specificity::exclude_dna_dna false  
-mute all  
-run_motifs  
-dtest 2.0  
-z1 0.97  
-r1 1.0  
-z2 0.97  
-r2 1.0  
-motifs::rotlevel 8  
-motifs::list_motifs /work/sthyme/list_August2011Motifs_noduplication_IAniI  
-motifs::output_file ./XXXX.motifs  
-packing::max_rotbump_energy 10.0
```

```

-patch_selectors SPECIAL_ROT
-probe_specificity 3
-binding
-score:output_residue_energies
-run:output_hbond_info
-run:min_type dfpmin_armijo
-run:min_tolerance 0.0001
-ndruns 1
-dna::design::z_cutoff 6.0
-score::weights /work/sthyme/weights/trunk_lkball.wts
-file:s /work/sthyme/INPUTPDBS_ANII/2QOJ.pdb
-dna::design::dna_defs X.408.ADE
-in:ignore_unrecognized_res
-database /work/sthyme/trunk_rosetta_2012/rosetta_database/
-ex1
-ex2
-exlaro::level 6
-ex2aro::level 6
-exdna::level 4
-extrachi_cutoff 0
-jd2:dd_parser
-overwrite

```

### Command line arguments used for modeling fixed sequences and calculating energies for specificity prediction with the rosettaDNA application:

```

-dna::specificity::exclude_dna_dna false
-mute all
-packing::max_rotbump_energy 10.0
-dna:design:repack_only true
-patch_selectors SPECIAL_ROT
-score:output_residue_energies
-run:output_hbond_info
-run:min_type dfpmin_armijo
-run:min_tolerance 0.0001
-ndruns 1
-dna::design::z_cutoff 6.0
-score::weights /work/sthyme/weights/trunk_lkball.wts
-file:s /work/sthyme/INPUTPDBS_ANII/2QOJ.pdb
-dna::design::dna_defs X.408.ADE
-in:ignore_unrecognized_res
-database /work/sthyme/trunk_rosetta_2012/rosetta_database/
-ex1
-ex2
-ex3
-ex4
-exlaro::level 6
-ex2aro::level 6
-exdna::level 4
-extrachi_cutoff 0
-jd2:dd_parser
-parser:protocol ../xml
-overwrite

```

### Corresponding XML file for using the rosettaDNA application:

```

<dock_design>
  <TASKOPERATIONS>
    <InitializeFromCommandline name=IFC/>
    <IncludeCurrent name=IC/>
    <RestrictDesignToProteinDNAInterface name=DnaInt z_cutoff=6.0 dna_defs=X.408.ADE/>
    <OperateOnCertainResidues name=AUTOprot>
      <AddBehaviorRLT behavior=AUTO/>
      <ResidueHasProperty property=PROTEIN/>
    </OperateOnCertainResidues>
    <OperateOnCertainResidues name=ProtNoDes>
      <RestrictToRepackingRLT/>
      <ResidueHasProperty property=PROTEIN/>
    </OperateOnCertainResidues>
  </TASKOPERATIONS>
</dock_design>

```



```

    <OperateOnCertainResidues name=DnaNoPack>
      <PreventRepackingRLT/>
      <ResidueHasProperty property=DNA/>
    </OperateOnCertainResidues>
  </TASKOPERATIONS>
<SCOREFXNS>
  <LKB weights=trunk_lkball/>
</SCOREFXNS>
<FILTERS>
  <FalseFilter name=falsefilter/>
</FILTERS>
<MOVERS>
  <DesignProteinBackboneAroundDNA name=bb_lk scorefxn=LKB
task_operations=IFC,IC,AUTOprot,ProtNoDes,DnaInt type=ccd gapspan=4 spread=3
cycles_outer=3 cycles_inner=1 temp_initial=2 temp_final=0.6/>
  <DnaInterfacePacker name=DnaPack scorefxn=LKB
task_operations=IFC,IC,AUTOprot,ProtNoDes,DnaInt probe_specificity=1 binding=1/>
</MOVERS>
<PROTOCOLS>
  <Add mover_name=DnaPack/>
</PROTOCOLS>
</dock_design>

```

When predicting the specificity of variants, the sequence of the starting scaffold PDB was changed with a script and the exact same protocol was used as for specificity prediction with the wild-type endonuclease sequence. Scripts for are available upon request for generating these variant PDBs, setting up organized directories for large-scale specificity prediction of many variants, and analyzing both design and specificity prediction data. The majority of the arguments in the command lines for both protocols are described in more detail in the supplementary material of the publication that details the motif-based design method (33).

Example PSSM file used for I-AniI target site searches:

Colors: Wild-Type, **Tolerated Substitution**, **Engineered Variant Substitution**

Values used are based on specificity data for I-AniI (12)

```

key A C G T
-10  2 1 2 -1
-9   100 50 -1 100
-8   -1 50 1 1
-7   30 100 -1 100
-6   100 1 -1 2
-5   -1 1 1 1
-4   100 2 -1 2
-3   1 1 -1 3
-2   1 1 1 -1
-1  1000 20 10 -1
1    1 1 1 -1
2    1000 -1 1000 10
3    2 2 2 -1
4    2 -1 2 2
5    1 1 1 -1
6    30 1 -1 50
7    2 4 30 -1
8    -1 1 1 1
9    -1 2 1 1
10   -1 1 1 1

```

Supplementary Figures

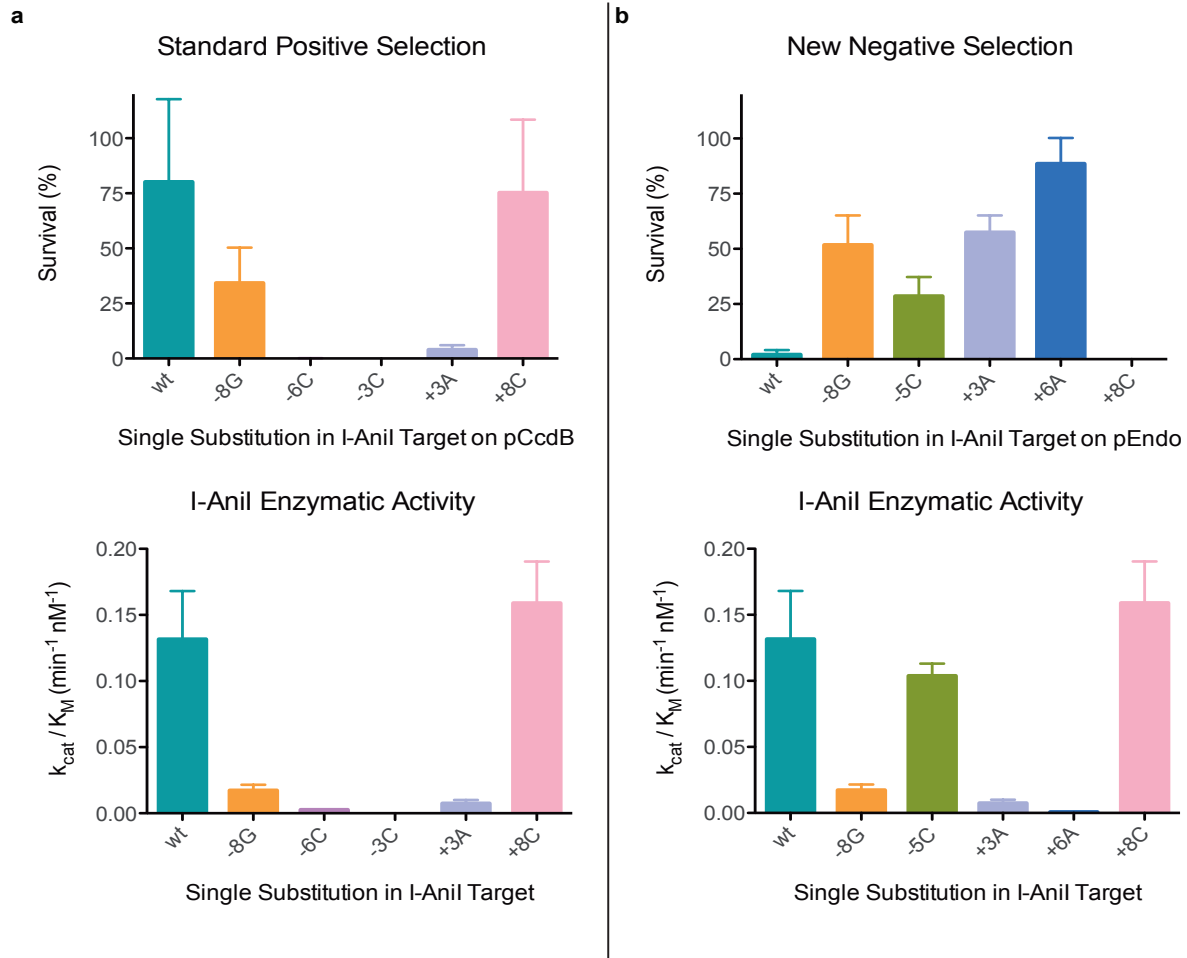

**Figure S1. a)** A comparison between survivals in the standard bacterial selection system (19) and kinetic data (12) for several single base-pair substitutions in the I-Anil target site. In this experiment, the target site is on the pCcdB plasmid and the M5 variant (32) of I-Anil is on the pEndo. The M5 or M4 variants (Figure 1) were used for all selection experiments in this work because they survive significantly better against single or double (tandem, not on opposite sides of the plasmid) wild-type target sites than the Y2 variant (9% for Y2 with two sites versus 44% with M5, completed side-by-side). High survival indicates cutting of the pCcdB plasmid and should correlate with a high  $k_{cat}/K_M$ . The selection system displays a wide dynamic range and survival closely matches the kinetic data for these single base-pair substitutions. **b)** A comparison between survivals with the new negative selection component of the bacterial selection system and kinetic data for several single base-pair substitutions in the I-Anil target site. In this experiment, the varying target site is on the pEndo plasmid and the pCcdB plasmid contains the wild-type target site. High levels of survival indicate that the M5 enzyme does not cleave the target site on the pEndo plasmid and that the pCcdB plasmid with the wild-type site is cleaved. This modified selection system also displays a wide dynamic range and the survival negatively correlates with the kinetic data.

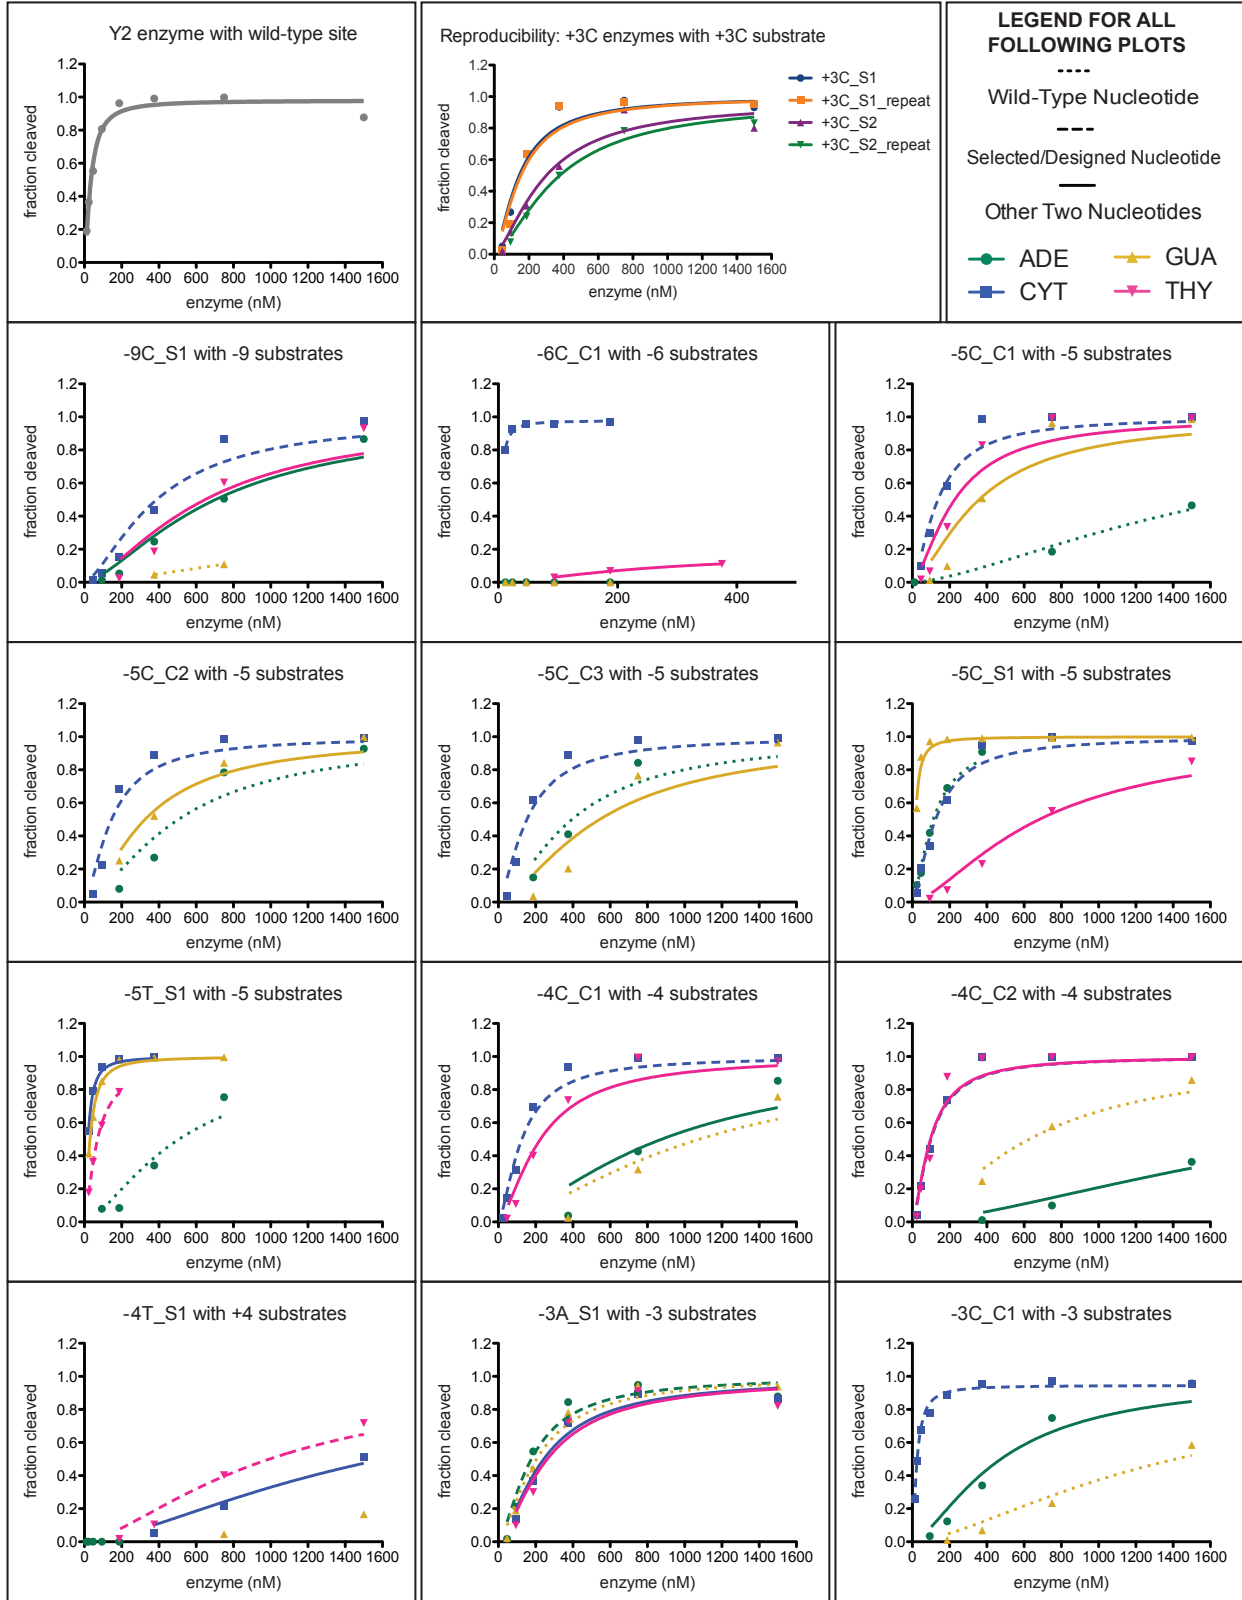

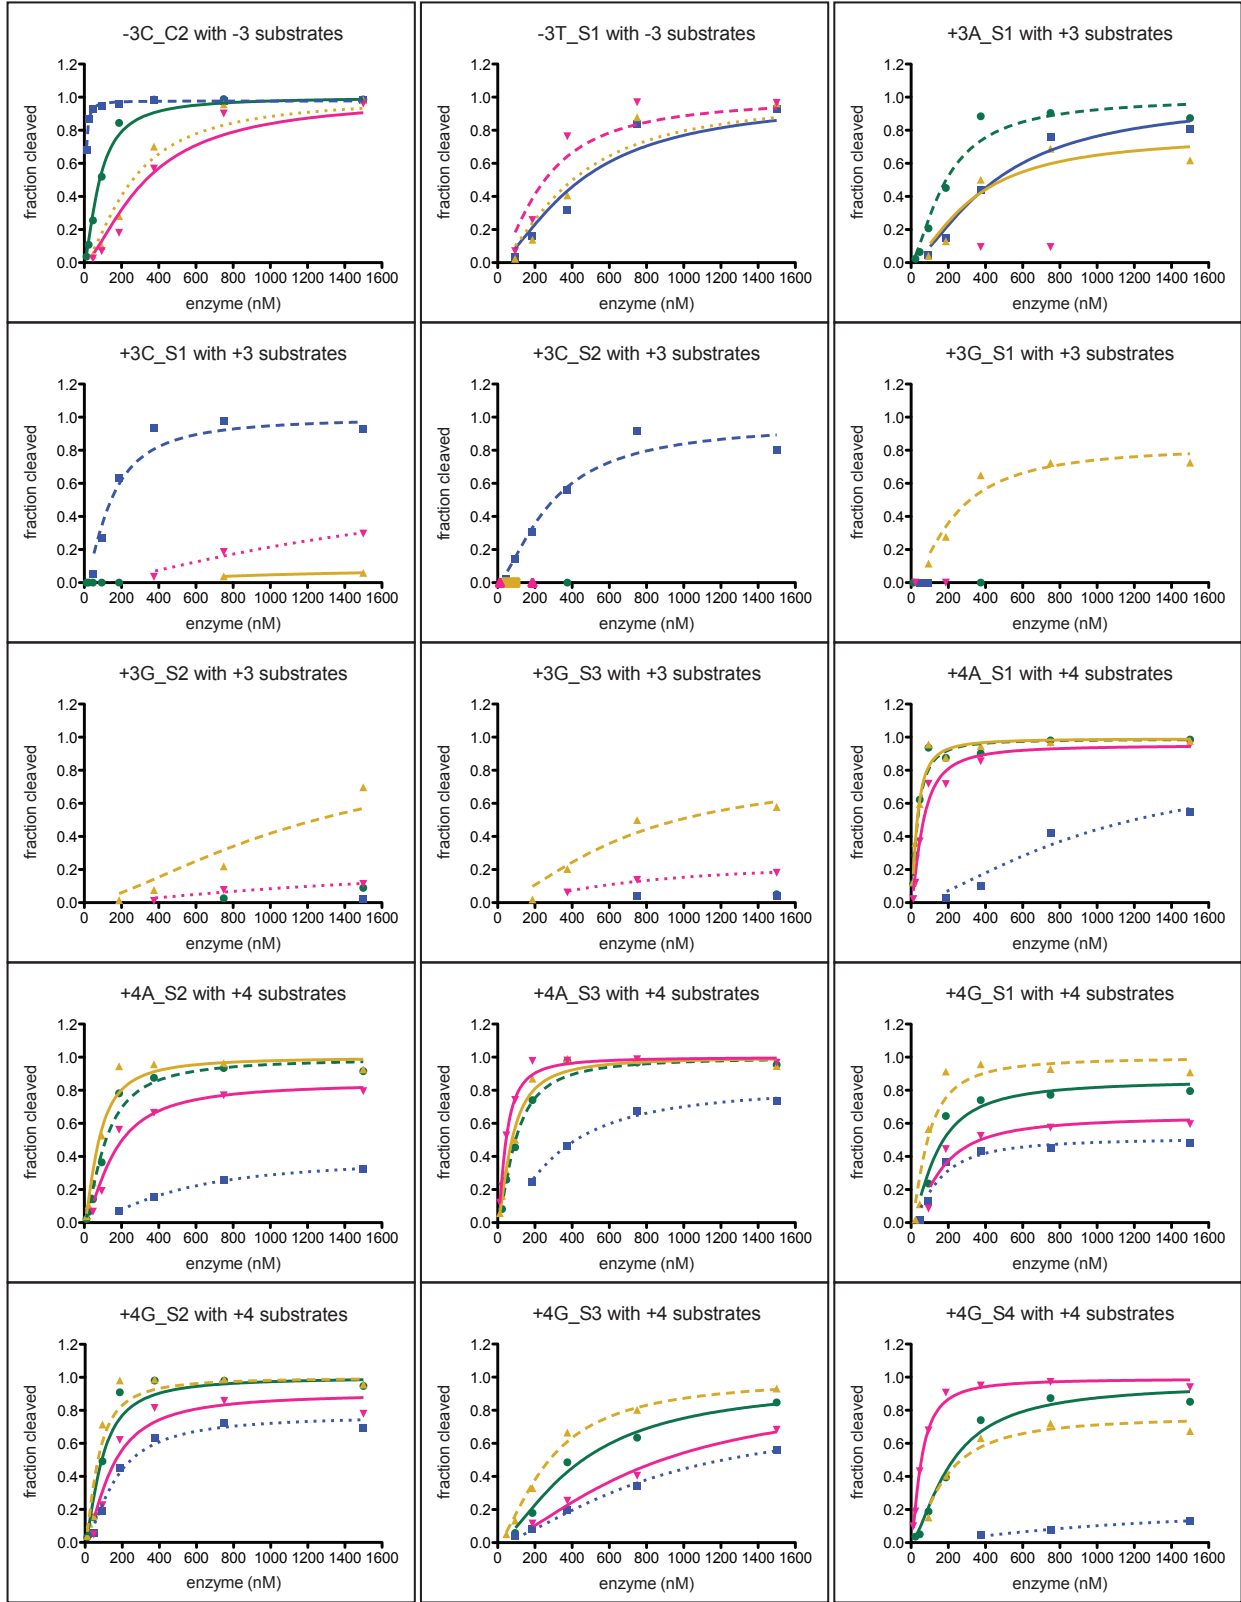

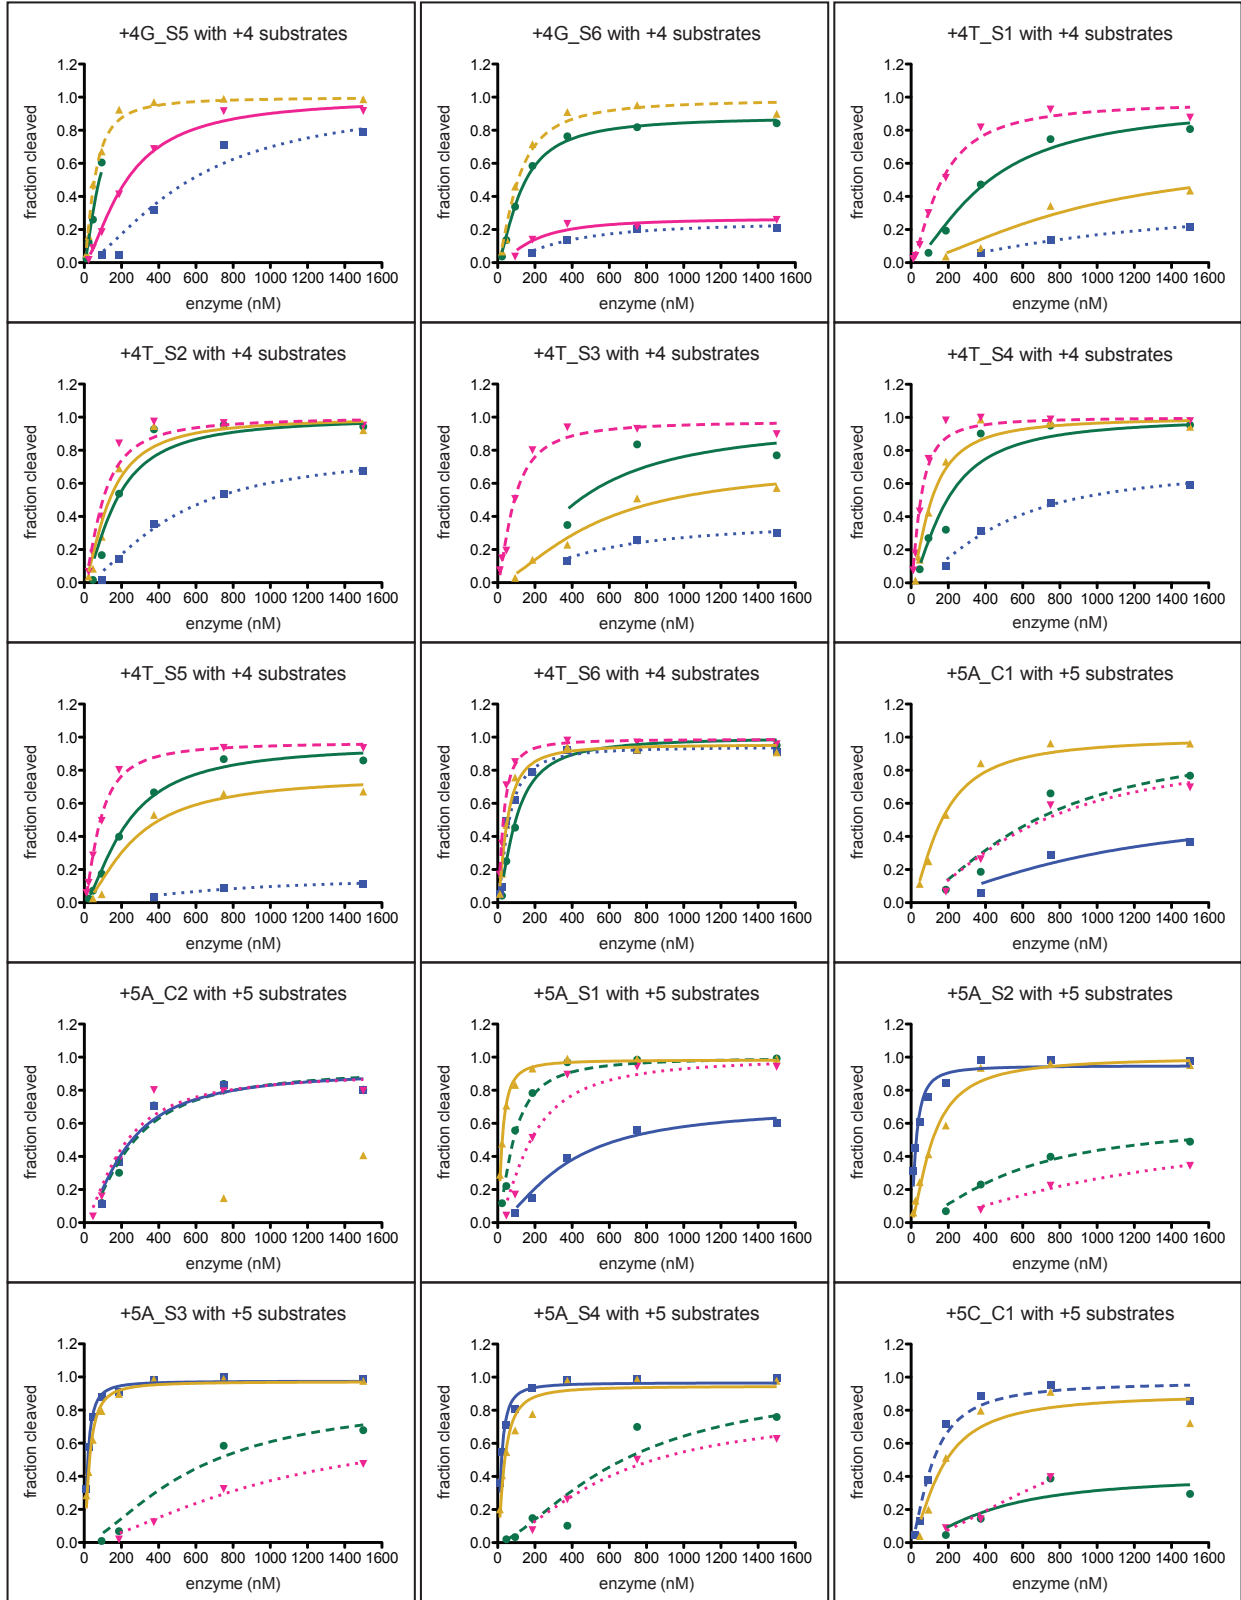

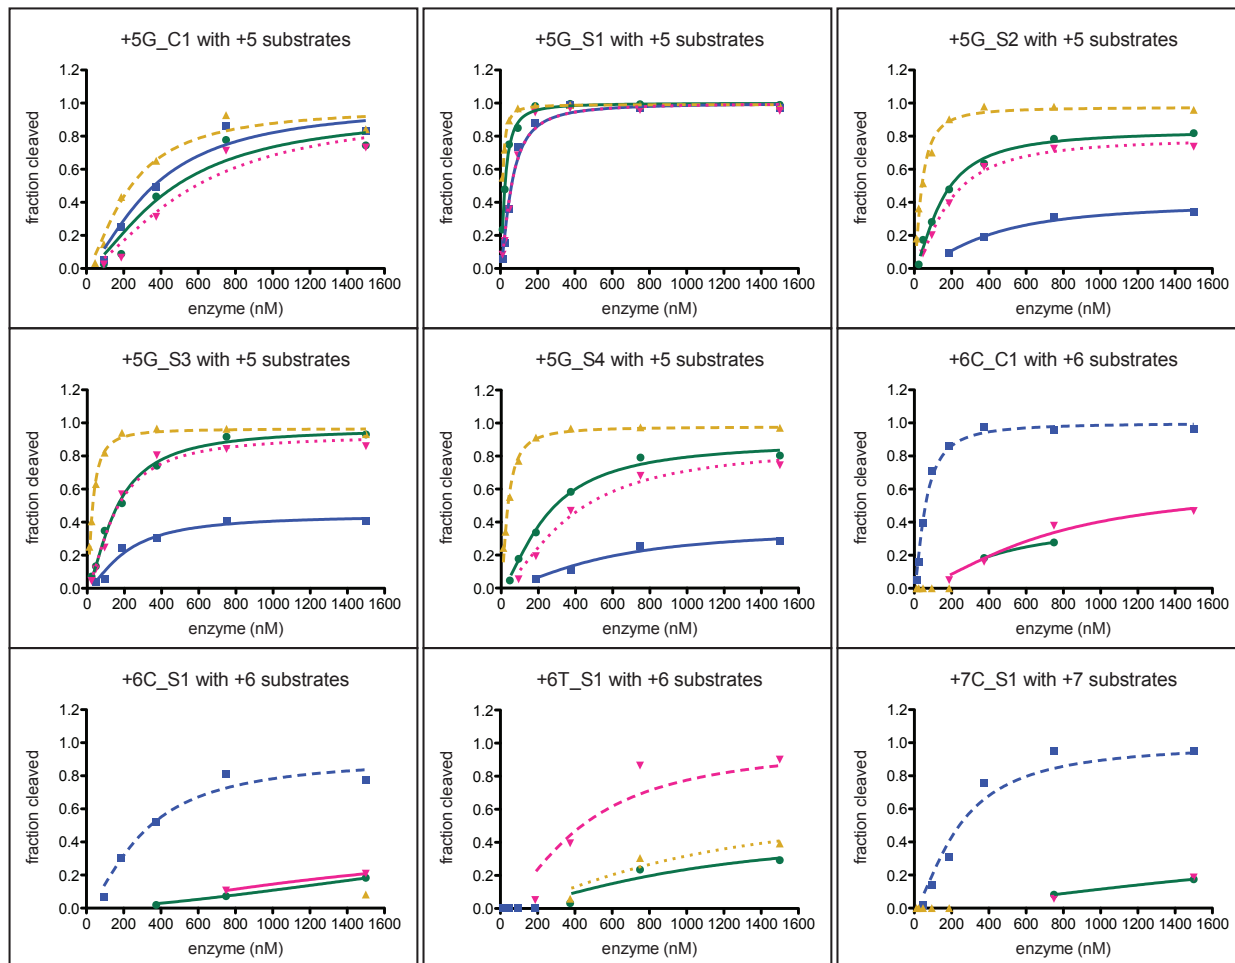

**Figure S2.** Cleavage data for selected endonucleases with each of the four bases at the targeted position. The activity level of the Y2 variant (32) of I-AniI with the wild-type target is shown in the first panel for comparison with these engineered enzymes. The second panel shows the high level of reproducibility for these cleavage experiments. The selection experiments all included a negative selection component against the wild-type I-AniI site. Thus it is expected that these enzymes will show high levels of cleavage of the targeted single base-pair substitution and reduced levels of wild-type site cleavage. This data is summarized in Table S1 as  $EC_{1/2max}$  and specificity values.

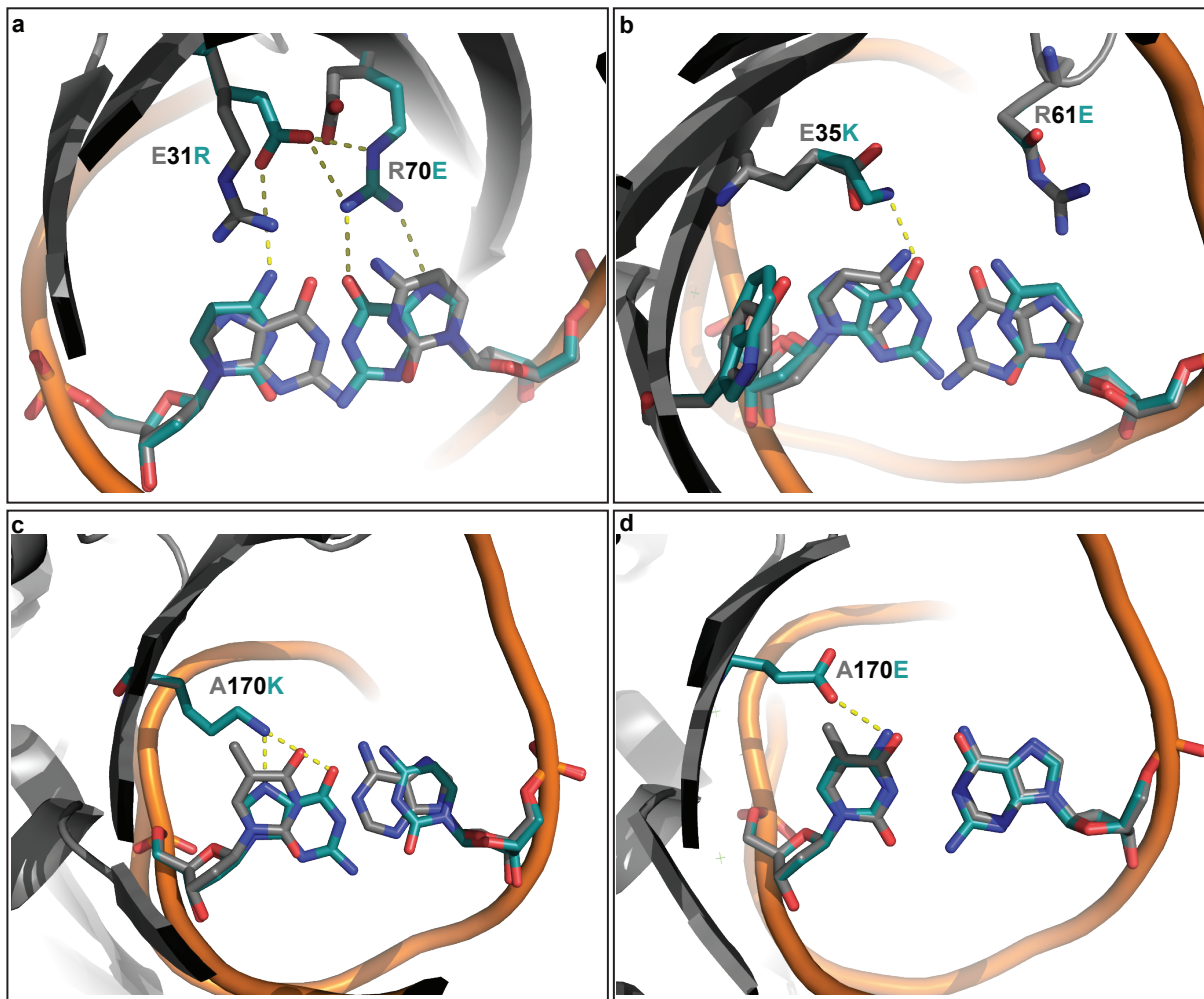

**Figure S3.** Computational models of motif interactions for single base-pair substitutions in the I-AniI (2qoj) target site show that the most specific I-AniI variants contain at least one strong, direct hydrogen-bonding contact. The presence of these contacts was the inspiration for the development of motif-biased design procedures (33), which enrich for native-like protein-DNA interactions. Each of the residues shown in the structures in this figure is classified as a motif contact by the computational methods. The lynchpin residue in the -6C and -3C variants was identified by previous computational methods (12), and libraries that combined the computational information with randomization of the surrounding residues increased both the activity and specificity of these two enzymes. The +3C and +3G variants both came from screens of fully randomized libraries using the modified directed evolution system that selects for specificity. **a)** The highly specific -6C\_C1 variant contains two contacts, the computationally derived E31R and the R70E mutation that was identified by a selection with E31R fixed. **b)** The -3C\_C1 and -3C\_C2 variants contain the designed mutation E35K, and selection was used to alter the sequence and length of a neighboring loop for significantly enhanced activity and specificity. The selected loop sequences contain multiple potential strong contacts, included R61E and R61D (Table S1). **c)** The +3G\_S1 variant contains A170K and was identified from a library of four fully randomized amino acids. **d)** The +3C\_S1 variant contains A170E and was identified from a library of four fully randomized amino acids.

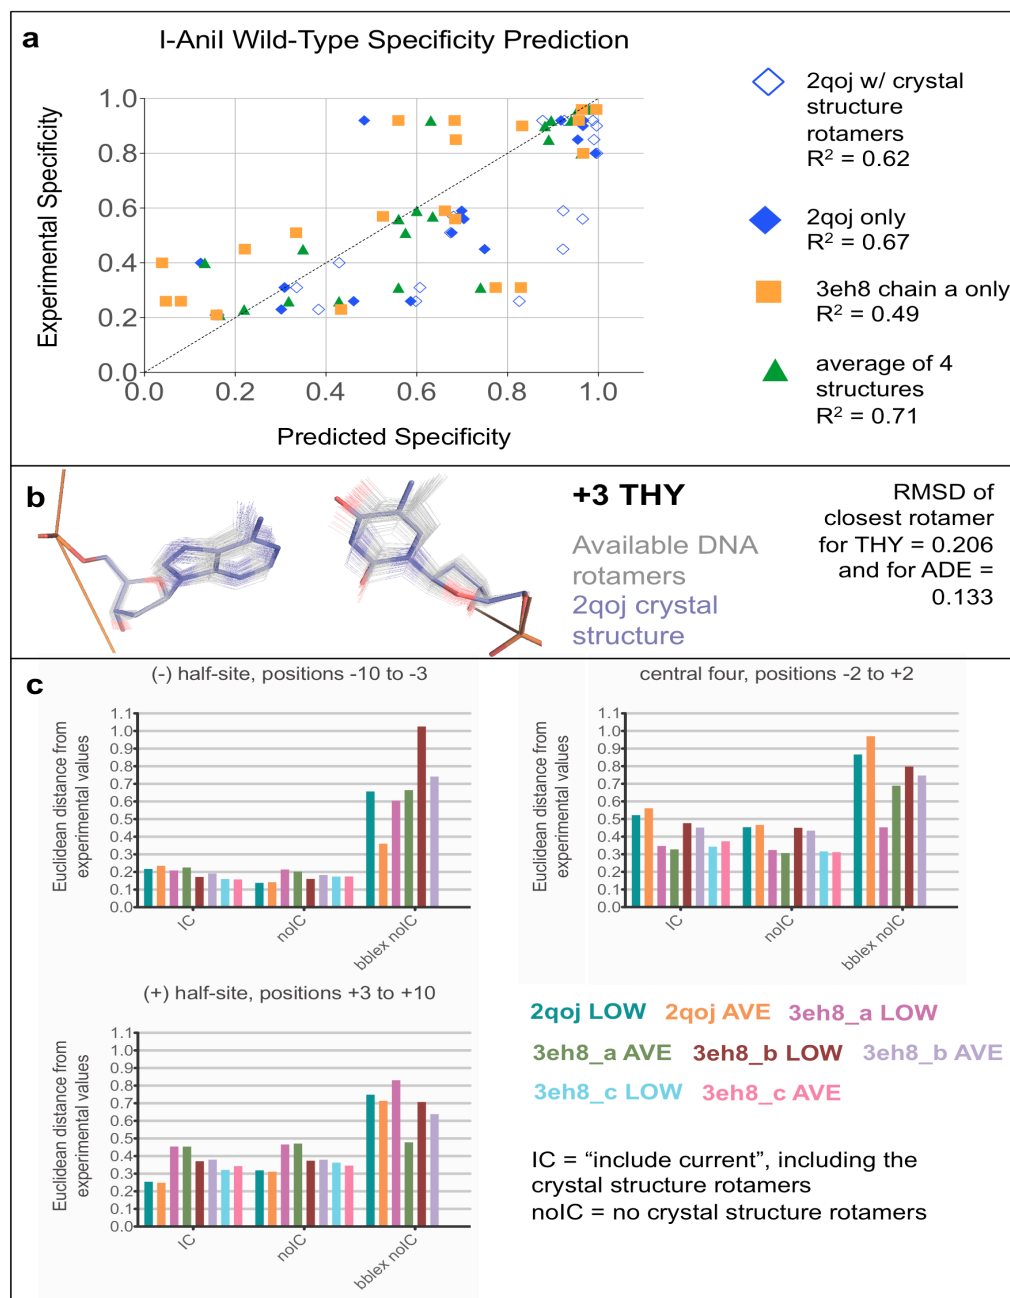

**Figure S4. a)** Fixed backbone calculations of specificity for each wild-type base in the I-Anil target site were compared to the experimentally-measured specificity. The calculated specificity was averaged across four starting structures (2qoj, and 3eh8, chains a, b, and c) and compared to the specificity predicted for the single 3eh8 structure (chain a) and the single 2qoj structure with and without the addition of crystal structure rotamers. The dashed black line represents  $y = x$ , corresponding to perfect prediction. **b)** The crystal structure DNA nucleotide (blue sticks) at position +3T in the I-Anil target site is not included in the set of available DNA rotamers (gray lines). **c)** Comparison of fixed and flexible protein backbone predictions, where a lower Euclidean distance indicates that the prediction better matches the experimental data. Specificity calculations using the average over the 56 runs (ave) and also using the lowest energy structure of the 56 (low) are compared.



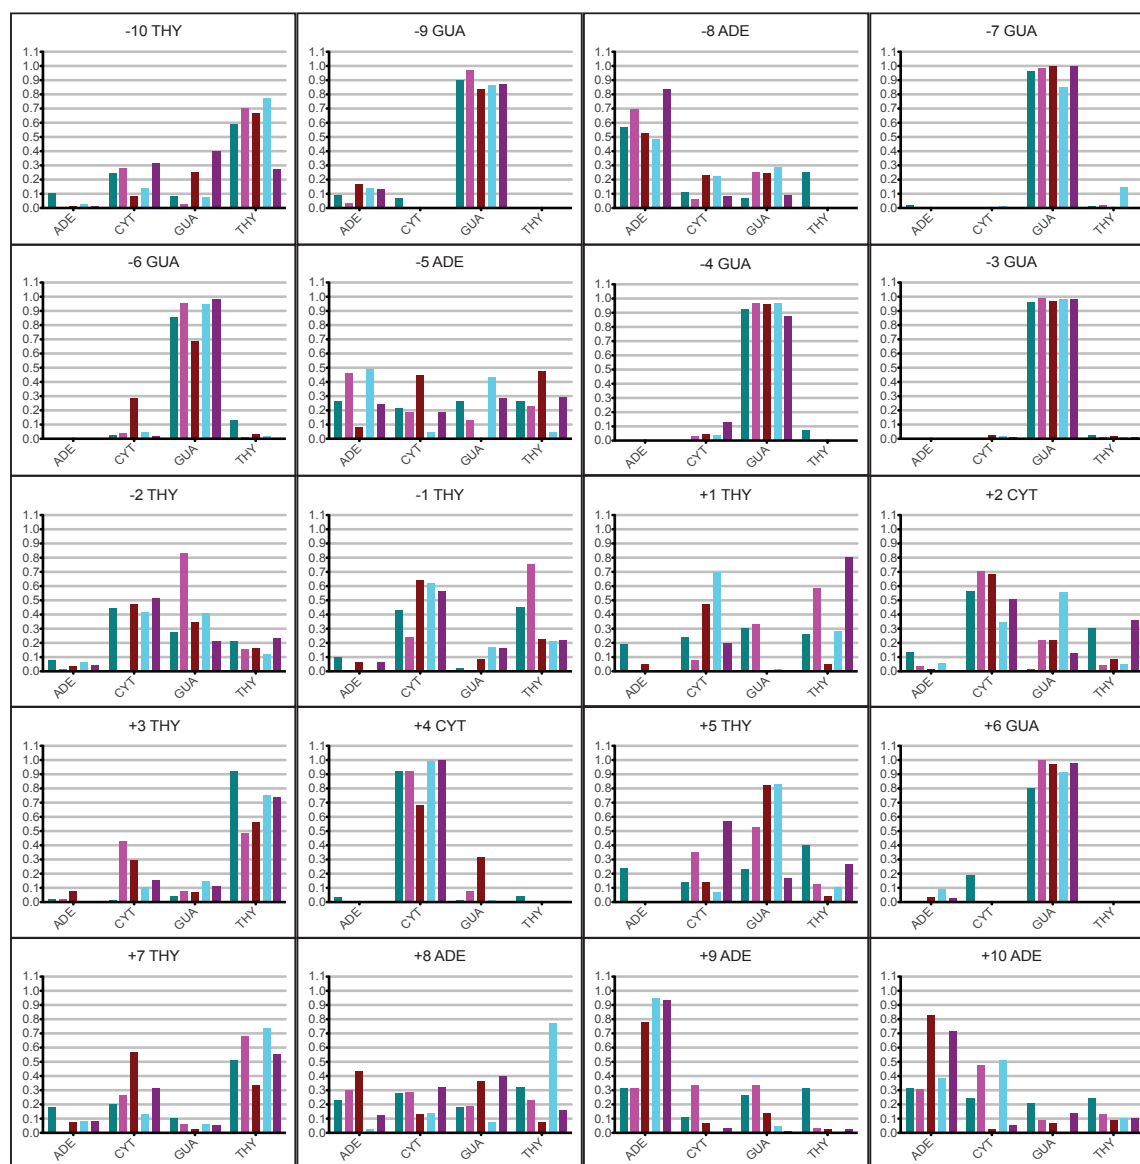

Experimental 2qoj AVE 3eh8\_a AVE 3eh8\_b AVE 3eh8\_c AVE

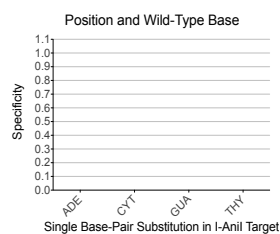

**Figure S5.** Specificity predictions compared with experimental specificity data (12) for each position in the I-Anil target site. The y-axis displays specificity, and low values mean the base-pair is poorly cut. Predictions were collected on four I-Anil structures. Highly specific positions, such as -4, were successfully predicted with all four structures. The most common cause of mis-predicted specificity is clashes that are not resolved with the fixed backbone model, such as in the case of +5A. Experimentally, +5A is similar to the other base-pairs at position +5. However, in the computational models the methyl group of the thymine paired with +5A clashes with the I-Anil protein in all four starting structures.

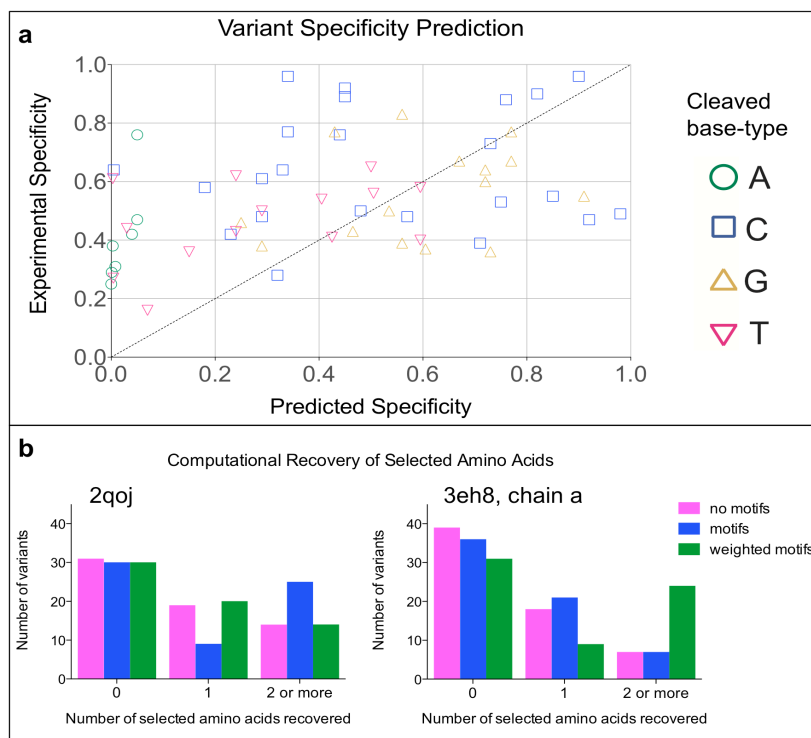

**Figure S6. a)** The variants are the same enzymes shown in Figure 3b and both color and shape correspond to the nucleotide type being targeted. The specificity predictions are averaged from the specificity values completed using two crystal structures, 2qoj and chain a of 3eh8 (separate values in Table S1). The dashed black line represents  $y = x$ , corresponding to perfect prediction. **b)** Recovery of selected amino acids with computational design – without motif rotamers included in the design process, with motif rotamers, and with motif rotamers that have an energetic weight (-1.25 REUs) – using the crystal structures 2qoj and chain a of 3eh8.

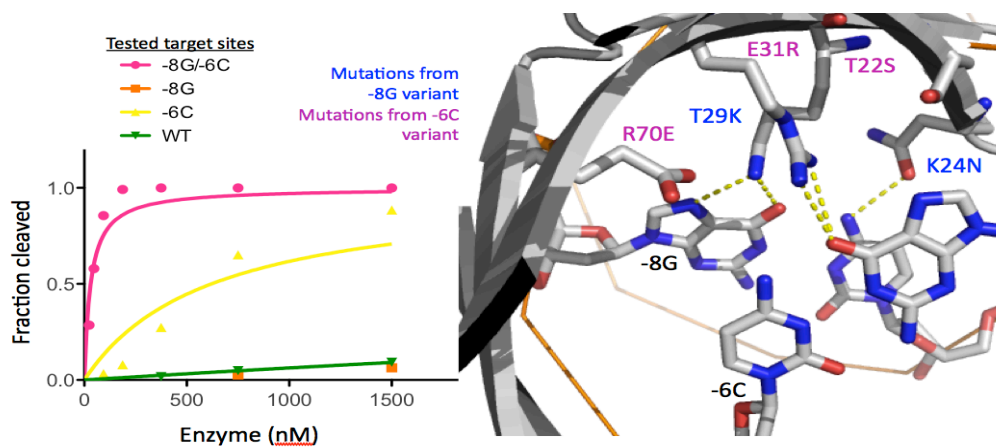

**Figure S7.** Two computationally derived endonuclease variants (12) can be combined without using selection for further sequence optimization. The -6C\_C1 and -8G\_P1 I-AniI variants are separated by only the -8G position. The main contact to -7G (R72) is maintained, maintaining the high specificity at -7 while successfully switching the specificity at -6 and -8. The variant with all five mutations targeting the two base-pair switches shows specific cleavage of the intended site.

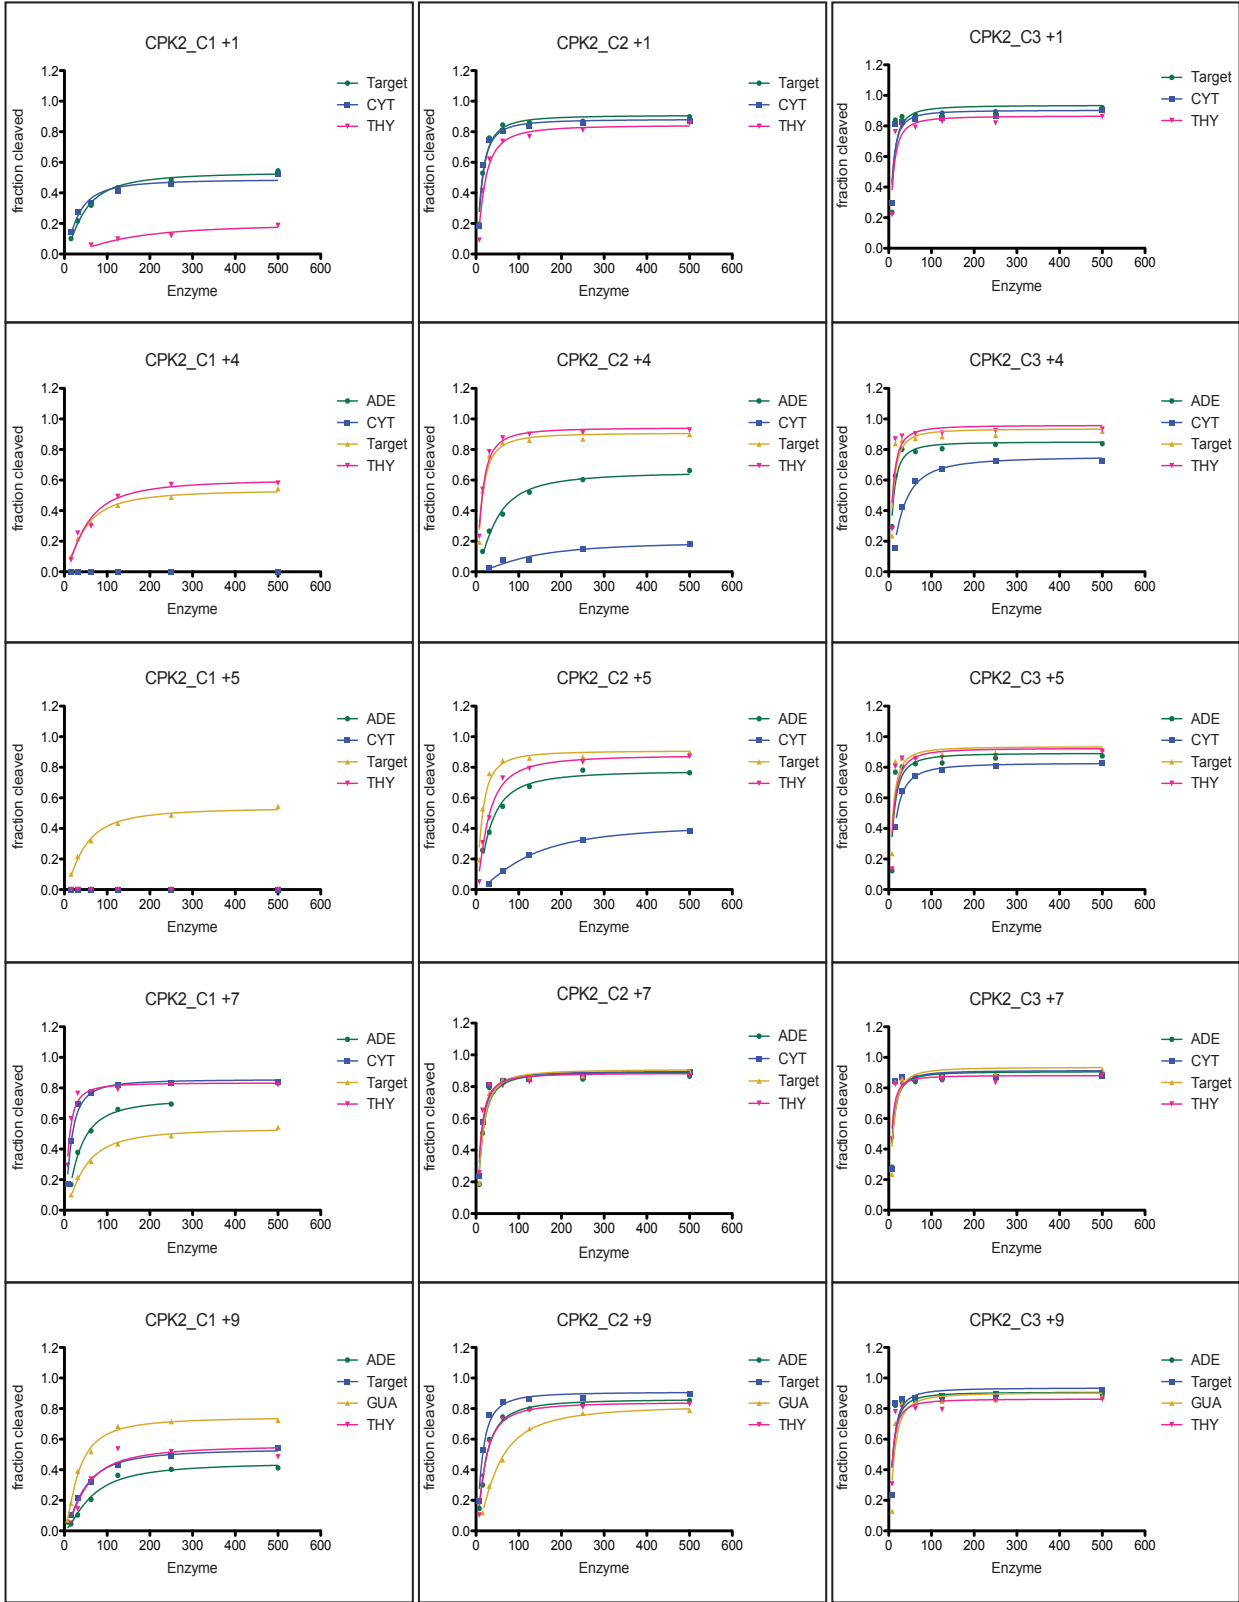

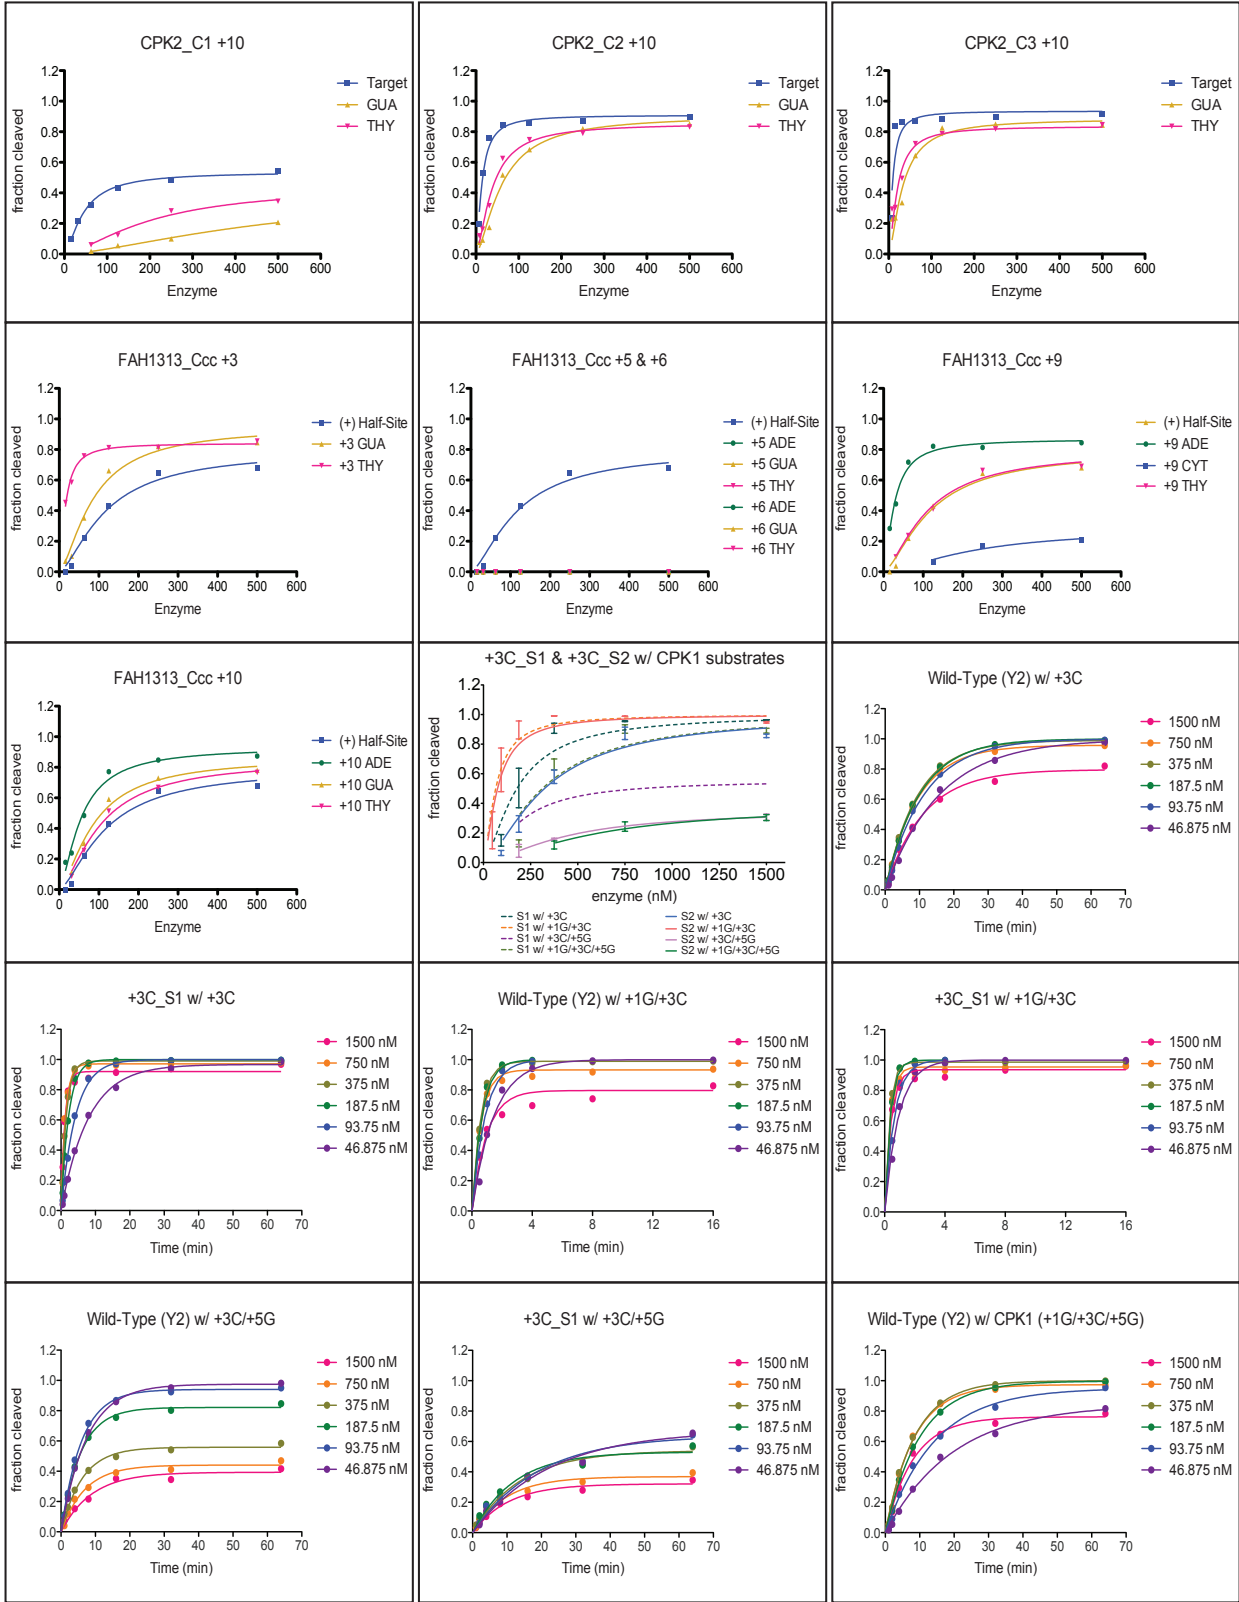

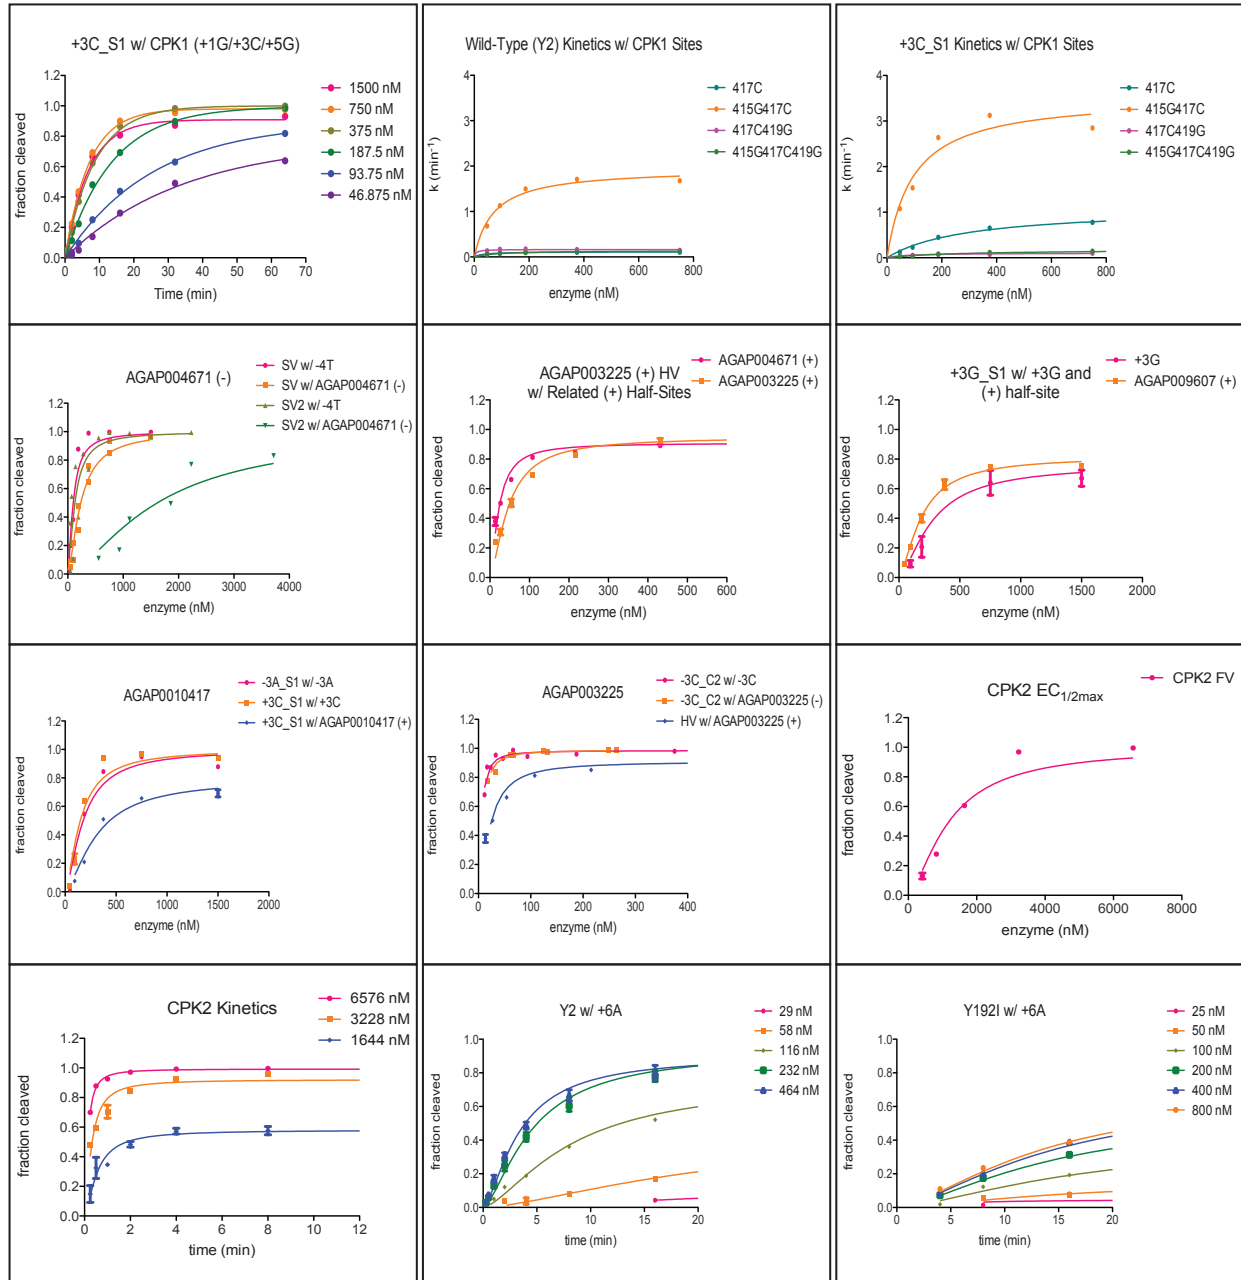

**Figure S8.** Cleavage data for endonucleases targeting multiple base-pair pockets and full sites.

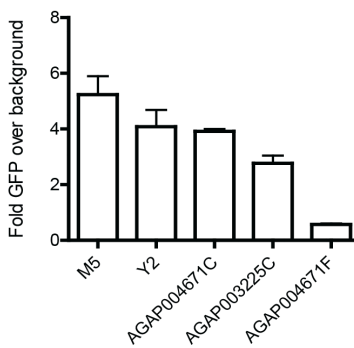

**Figure S9.** Endonucleases targeting the (+) half-site changes in two mosquito sites show activity in human cells. The level of cleavage of these two variants is comparable to cleavage by the M5 and Y2 variants of the I-AniI endonuclease (32) with the wild-type target site. An unsuccessful variant for the full AGAP004671 site, containing mutations known to abrogate cleavage on the site, is included to demonstrate the level of background in this assay. The two C-terminal variants were built on the M5 background. The assay was completed as previously described (42, 46).

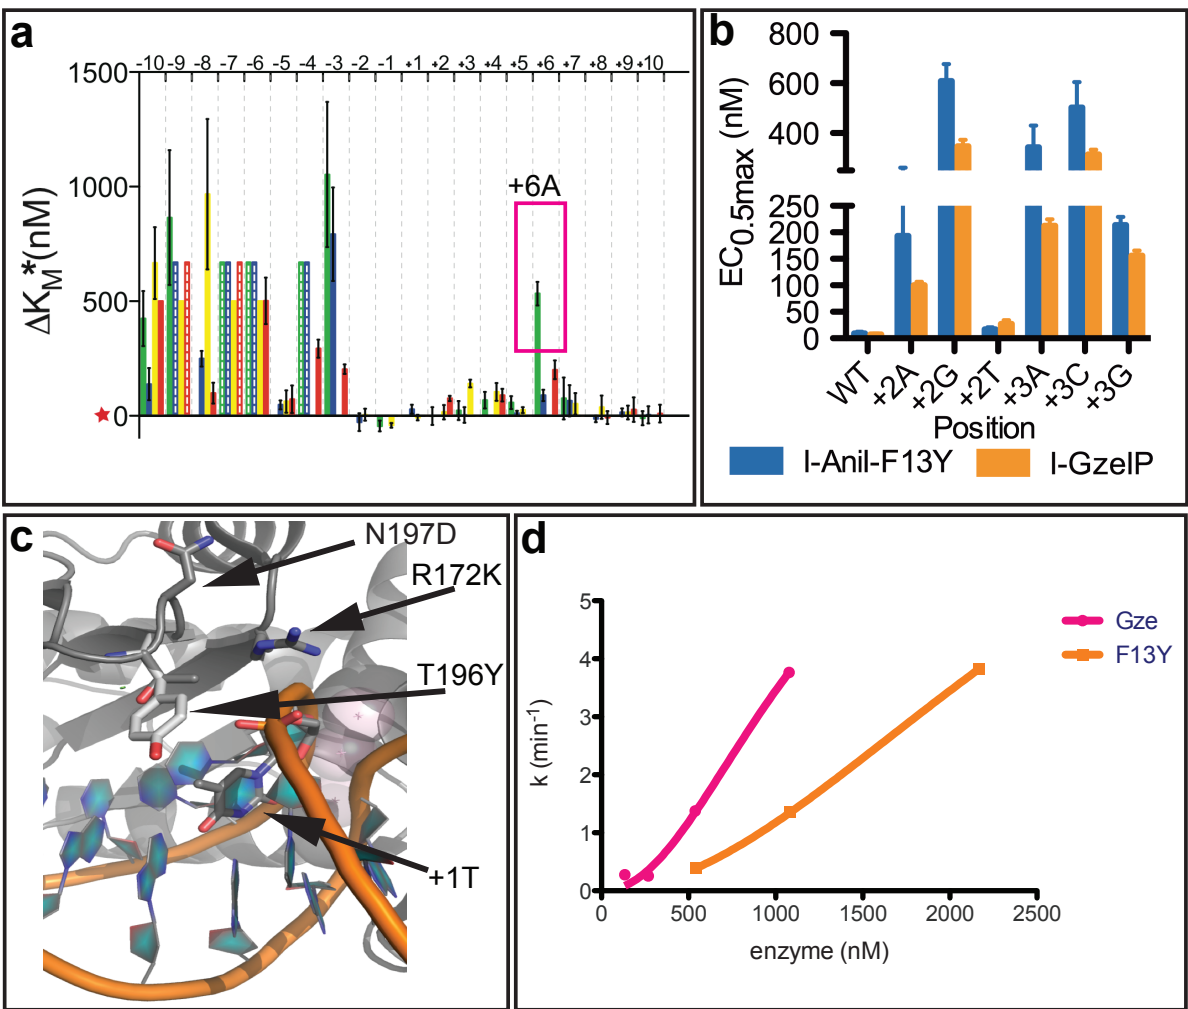

**Figure S10.** Evidence for a role of C-terminal loop 190-199 in formation of the ground-state reaction complex. **a)** Differences in binding affinity ( $K_M^*$ ) between I-Anil (Y2) with the wild-type I-Anil target and each possible single base-pair substitution (12). I-Anil has decreased binding affinity (increased  $K_M^*$ ) with +6A compared to the wild-type +6G. **b)** Activity ( $EC_{1/2max}$ ) data for a hybrid enzyme built by transferring mutations at positions 172, 196, and 197 to the I-Anil scaffold (34). The enzyme is more active than the comparable I-Anil-F13Y starting scaffold (F13Y mutation only in base enzyme) with sites containing single base-pair substitutions near the transplanted mutations. **c)** Visualization of the mutations in this hybrid enzyme. T196Y may be increasing the hydrophobic interactions in the interface and be responsible for the better activity of the hybrid. **d)** Preliminary kinetic data for the hybrid variant compared to the I-Anil-F13Y starting scaffold with the same target site indicates that the improvement is likely due to increasing binding affinity (decreasing  $K_M^*$ ).

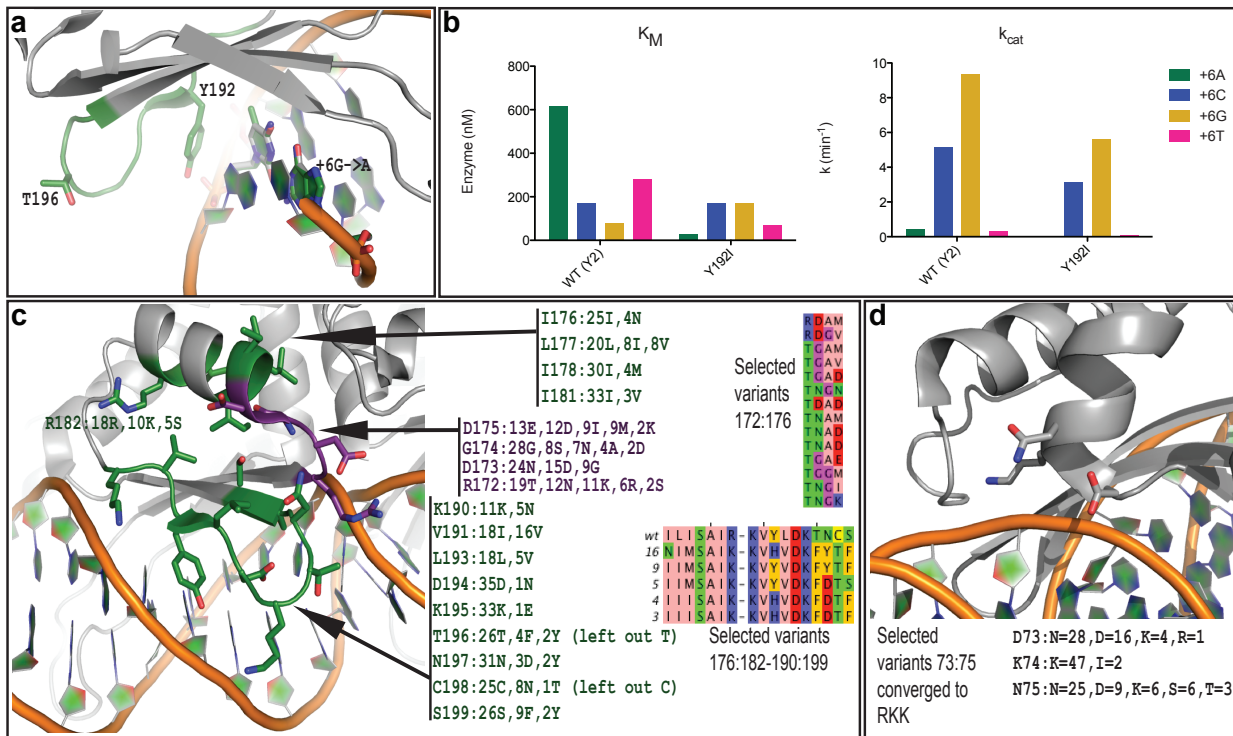

**Figure S11.** Mutations from I-AniI homologues that alter catalysis and binding. **a**) The loop containing Y192I and T196, another mutation implicated in ground state complex formation (Figure S10), is shown in green. The methyl group of the thymine on the DNA strand opposite to +6A may be destabilizing the loop and ground state complex. **b**) Kinetic analysis of the Y2 (WT) I-AniI endonuclease and a Y2-based variant with the Y192I mutation identified in homologous enzymes (34). Substitutions in the (+) half of the I-AniI target site mainly modulate  $k_{cat}^*$  and not  $K_M^*$ . The adenine substitution at position +6 is an exception, with a much higher  $K_M^*$  than any other substitution in the (+) half-site (Figure S10). The Y192I substitution alters the binding of +6 substitutions, significantly lowering the  $K_M^*$  for +6A. **c**) All homologues with over approximately 50% identity to I-AniI (34) were analyzed and the mutations in the loop from K190 to S199 and supporting residues from R172 to I181 were used to design limited libraries. The amino acid variation included in these libraries is shown on the structure. Not every mutation observed in the set of analyzed homologues was included in the libraries, and the frequencies that each type was seen are also shown (ie, D175:13E indicates that there were 13 glutamates seen at position 175). One library was built for the loop from R172 to D175 (purple), and a second was built with the remaining region spanning I176 to S199 (green). These libraries were screened against the -6C single base-pair substitution that significantly decreases binding affinity without altering catalysis. The sequences identified with the selection process are shown as alignments. **d**) Additional libraries were built from mutations identified in homologues in the N-terminal region from positions 73-75. This region is one of only a small number of regions that contact the DNA backbone and not the bases, making it a good candidate for modulation of non-specific interactions. The sequences included in the libraries are shown below the image of the area. The library was also screened against the -6C substitution and the sequence converged completely to D73R, K74K, and N75K.

*Supplementary Discussion A. Rosetta computational predictions of experimental data.*

The single base-pair specificity switches we describe in this paper provide a valuable benchmark for evaluating and guiding the improvement of computational design methods. Both specificity prediction and sequence design calculations were carried out for these I-AniI variants, as well as for all positions in the wild-type I-AniI interface, and compared to experimental data to assess the accuracy of the computational model. For the specificity calculations, the base in the crystal structure DNA targeted by the variant enzyme was substituted with each of the four possible nucleotides at the position and the energies of the four complexes were compared. The protein positions surrounding this position were kept fixed in sequence, either the sequence of the evolved variant or the wild-type protein sequence, for specificity calculations, but allowed to vary in design calculations.

We compared the experimentally determined specificity of I-AniI to specificity predicted for 1) four single I-AniI structures, 2) the average of the four, and 3) with and without inclusion of sidechain and base conformations from the starting crystal structure (Figure S4a, Figure S5). The predictions were most accurate for positions with high specificity and direct contacts, while there was significantly less agreement for positions with lower specificity. Supplementation of the standard rotamer libraries used to model sidechain (69) and base conformations (63) with conformations from the starting crystal structures caused an inaccurate bias for the crystal structure base-pair (Figure S4a). In calculations including DNA base conformations, the crystal structure nucleotide was almost always incorporated at one or both strands of the targeted position, resulting in inaccurately high specificity prediction. At the one target site position that benefited from inclusion of the crystal structure rotamer, none of the Rosetta-generated DNA rotamers was similar enough to produce the low energy interactions with the +3 base-pair that correspond to high specificity (Figure S4b). These results indicate that the DNA rotamers generated are not sufficient for accurate modeling of specificity, and it will be important to improve these rotamers for future work.

The average specificity value calculated over the four structures matched the experimental data better than the single structure, suggesting the protein backbone of the starting structure also biases this calculation (Figure S4a). The bias observed here can in principle be resolved by incorporating backbone flexibility (64–67) but this is complicated as the levels of structural movement must be enough to resolve clashes that erroneously penalize tolerated sequence changes, but not so much that the specificity signal is lost in the energetic noise of these movements or that inaccurate energetic minima are favored. Flexible backbone calculations performed much worse than did fixed backbone calculations for recapitulation of I-AniI wild-type specificity data (Figure S4c).

Calculations employing the wild-type I-AniI crystal structures were less successful in recapitulating the cleavage specificities (Figure S6a, Table S1) and amino acid sequences (Figure S6b) of the engineered variants, likely also because of changes in either the protein or DNA backbone positions not modeled in the calculations. The recently introduced motif-biased design approach (33), in which motif rotamers are incorporated into the Rosetta rotamer library and given an energy bonus, was more successful in recovering the sequences of the variants given their cleavage specificities than design without motifs. The majority of motif interactions are



direct, hydrogen-bonding contacts, and the model more accurately identifies these interactions than indirect contacts. However, even with the motifs, the recapitulation of this experimental benchmark was significantly less successful than in similar calculations recovering the sequences of crystal structures (33).

A key issue in computational modeling and design of new protein sequences starting from a static crystal structure is how to add enough flexibility to resolve small incompatibilities that are normally tolerated by dynamic proteins, but not allow so much that inaccurate minima are found for repulsive interactions that should not be tolerated. The minimal movement used in this work, only rotamers on both sides of the interface, was not enough to resolve clashes in some cases, particularly when attempted to recapitulate the specificity of engineered variants. Our finding that the different I-AniI structures can produce significantly different results (Figure 4a, Figure 5) indicates that combining information from multiple experimentally determined backbones would be more successful than using a single starting point. Multiple starting crystal structures are rarely available, so an algorithm that produces multiple experimentally relevant backbones based on the original electron density would be very useful (68). Since the repulsive interactions that need to be resolved are often arising between backbone and side-chain atoms, another potential option would be to eliminate the repulsive interaction energy term only between backbone side-chain atoms during fixed backbone modeling stages.

#### *Supplementary Discussion B. Improving the binding affinity of I-AniI.*

Selections to improve the overall activity of I-AniI (without changing the target sequence) have been successful in the past (32). The Y2 (S111Y, F13Y) and M5 (Y2 with I55V, F91I, S92T) variants of I-AniI that were used in all of the assays and libraries screened in this work were identified using the original version of the bacterial selection system that only screens for activity (19, 32). Before I-AniI was improved with these mutations, it showed essentially no survival in the bacterial system, even when four copies of its target site were included on pCcdB. The enzyme that was engineered to cleave the full CPK2 site has poor binding affinity compared to its wild-type precursor (Figure 6c). Selections to improve activity and binding for the wild-type endonuclease have the potential to identify mutations that can be incorporated into engineered enzymes like this one. The previously identified Y2 mutations, S111Y and F13Y, are both in the N-terminal domain that is associated with substrate binding and ground state complex formation (12). These findings indicated that the most promising regions for improving these same characteristics were other N-terminal areas that are near the DNA backbone, since the goal is non-specific affinity rather than direct base contacts. However, it was noticed I-AniI showed decreased binding affinity ( $K_M^*$ ) when the +6 position in its target sequence was mutated from guanine to adenine (Figure S10a). This result is surprising because DNA substitutions in the rest of (+) half of I-AniI interface do not affect  $K_M^*$  or formation of the ground state complex (12). Therefore, it might be possible to modulate  $K_M^*$  through mutations in the C-terminal domain of the complex. Further support for this insight came from examining a homologue-derived hybrid enzyme with mutations at positions 172, 196, and 197, all in the C-terminal domain (34). This variant showed increased activity over the wild-type I-AniI and preliminary kinetic data indicated the improvement was due to decreasing  $K_M^*$  (Figure S10). A key feature of this enzyme was the mutation of T196 to a tyrosine, significantly increasing hydrophobic interaction between the protein and DNA on the (+) half of the target site (Figure S10c).

While it is unclear exactly how the +6A mutation decreases binding affinity, one potential result of the base substitution is an increase in ground state repulsive interactions between the protein and the methyl group of the thymine paired with +6A. This methyl group is near residue Y192, which is on the same loop as the T196 substitution in the homologue-derived variant with increased activity (Figure S10). Position Y192 is mutated to an isoleucine in homologous endonucleases with a +5A single base-pair substitution (34), which also places a methyl group near this protein position. To further explore the role of this C-terminal loop from position 190 to 199, kinetic analysis was completed with the Y192I variant and all four base-pairs at position +6. If the thymine methyl is disrupting the interaction of Y192 in the ground state complex, then the isoleucine mutant should not display the high  $K_M^*$  seen for the tyrosine with the +6A substitution. While the pattern of  $k_{cat}^*$  remained relatively similar for the Y192I endonuclease, albeit slightly reduced for all bases, the pattern of  $K_M^*$  shifted dramatically. The Y192I mutation does result in significantly tighter binding of the +6A substitution, while affinity for the wild-type nucleotide remained relatively similar (Figure S11). This result provides evidence that a region of the I-AniI C-terminal domain is involved in interactions in the ground state complex, in contrast to the rest of the domain that was shown to play a role in forming the transition state complex.

Even though the previously identified I-AniI activating mutations (M5 and Y2) are all in the N-terminal domain, our results indicate that it is possible to improve binding affinity through mutations in one region of the C-terminal domain. After selection was used to identify the M5 and Y2, it was observed that some of these activating mutations were in I-AniI homologues. With the goal of further improving the binding affinity of I-AniI variants, homologues with over 50% identity to I-AniI were analyzed in the N-terminal domain and the C-terminal region that has been implicated in ground state complex formation. Three libraries were built and screened for activity using bacterial cells containing a site with the -6C substitution. This particular substitution is known to substantially reduce I-AniI binding affinity in enzyme assays (12) and the most active I-AniI variant (M5) was shown to have effectively no survival in these cells (Figure S1). Thus, variants with increased binding affinity greater than M5 will be selected from these libraries. The amino acids included in the starting libraries are shown in Figures S11c and S11d. The selected enzymes from the N-terminal library and the smaller C-terminal library (172:175) showed survivals of approximately 100% against the -6C cell line that previously was not cleaved by M5. The other C-terminal library also showed improved survival, albeit not as significantly as the smaller libraries. The sequences of these high-surviving variants are also shown in Figures S11c and S11d. The N-terminal library converged completely to positively charged amino acids. The C-terminal libraries did not converge to specific sequences, but they showed trends for particular positions such as the mutation of R172 to a threonine. While these particular mutations may not provide exactly what is needed to increase the binding affinity of the CPK2 variant, screening libraries based on homologous enzymes did significantly improve I-AniI (M5) activity against the -6C containing substrate.

**Table S1.** Data for all single base-pair I-Anil variants described in this paper. Cleavage data is from the graphs in Figure S2. Endonucleases are named according to the position and base-pair of intended cleavage and the method used to engineer their new specificities (see further description of naming system below and in Figure 1). The “\_P” or “previously published” enzymes that have  $k_{cat}/K_M$  activity data (highlighted in green) are from Thyme, S. B. *et al. Nature* (2009) (12) and the other published enzymes are from Szeto, M. D. *et al. JBC* (2011) (34). Sequences of variants that were selected, but not expressed and tested with cleavage assays, are also included in this table.

| Targeted Position in the I-Anil Site and Selected Variant Name                                                                         | Starting Library, X = all 20 Aas (either NNN or NNS)                                | Library Survival (0 - 1), round 2        | Target Site                                                | EC <sub>1/2max</sub> (nM), or $k_{cat}/K_M$ for some _P enzymes | Cleavage Plateau ( $f_{max}$ ), NA for $k_{cat}/K_M$ | Cleavage Specificity; see methods for calculation | Predicted Specificity Showing Data for 2qoj / 3eh8_a; see supplemental methods |           |         |
|----------------------------------------------------------------------------------------------------------------------------------------|-------------------------------------------------------------------------------------|------------------------------------------|------------------------------------------------------------|-----------------------------------------------------------------|------------------------------------------------------|---------------------------------------------------|--------------------------------------------------------------------------------|-----------|---------|
| <b>Selected variants, S = selected from random library, C = selected from computationally guided library, P = previously published</b> |                                                                                     |                                          |                                                            |                                                                 |                                                      |                                                   |                                                                                |           |         |
| -9C_S1, K23R, K24A, T29I                                                                                                               | K23X, K24X, G25X, T29X                                                              | 0.17                                     | Target                                                     | 388 ± 119                                                       | ~1                                                   | 0.42                                              | 0.31/0.31                                                                      |           |         |
|                                                                                                                                        |                                                                                     |                                          | -9C                                                        | A                                                               | 703 ± 231                                            | ~1                                                | 0.23                                                                           | 0.17/0.32 |         |
|                                                                                                                                        |                                                                                     |                                          | G                                                          | 1482 ± ?                                                        | 0.41                                                 | 0.11                                              | 0.38/0.37                                                                      |           |         |
|                                                                                                                                        |                                                                                     |                                          | T                                                          | 648 ± 412                                                       | ~1                                                   | 0.25                                              | 0.14/4E-2                                                                      |           |         |
| Untested -9C variants, same library as -9C_S1                                                                                          | residue numbers in alignment: 23, 24, 25, 29                                        |                                          | wt K K G T<br>3of5 R A G I<br>1of5 R C G C<br>1of5 R A G V |                                                                 |                                                      |                                                   |                                                                                |           |         |
| Untested -9T variants                                                                                                                  | K23X, K24X, G25X, T29X                                                              | 0.04                                     | 23, 24, 25, 29                                             | wt                                                              | K K G T                                              | 1of15                                             | R A G I                                                                        | 1of15     | R C G Q |
|                                                                                                                                        |                                                                                     |                                          |                                                            | 7of15                                                           | R A C T                                              | 1of15                                             | K A C V                                                                        |           |         |
|                                                                                                                                        |                                                                                     |                                          |                                                            | 2of15                                                           | R A G V                                              | 1of15                                             | S A C Q                                                                        |           |         |
|                                                                                                                                        |                                                                                     |                                          |                                                            | 1of15                                                           | R A G Q                                              | 1of15                                             | C A C T                                                                        |           |         |
| Untested -8C variants                                                                                                                  | K23X, K24H, G25X, T29X, L112X                                                       | 0.34                                     | 23, 24, 25, 29, 112                                        | wt                                                              | K K G T L                                            | 1of8                                              | S H C N A                                                                      |           |         |
|                                                                                                                                        |                                                                                     |                                          |                                                            | 2of8                                                            | R H H N L                                            | 1of8                                              | C H G G A                                                                      |           |         |
|                                                                                                                                        |                                                                                     |                                          |                                                            | 1of8                                                            | R H G T L                                            | 1of8                                              | A H C C A                                                                      |           |         |
|                                                                                                                                        |                                                                                     |                                          |                                                            | 1of8                                                            | R H S T A                                            | 1of8                                              | R H R Q A                                                                      |           |         |
| -8G_P1, K24N, T29K                                                                                                                     | NA, test of the method                                                              | 0.50 for single clone test               | Target                                                     | 31 ± 5                                                          | 0.89                                                 | 0.92                                              | 0.82/0.02                                                                      |           |         |
|                                                                                                                                        |                                                                                     |                                          | -8G                                                        | A                                                               | 1107 ± 195                                           | ~1                                                | 0.03                                                                           | 0.11/2E-3 |         |
|                                                                                                                                        |                                                                                     |                                          | C                                                          | 1218 ± 333                                                      | 0.91                                                 | 0.02                                              | 0.07/0.94                                                                      |           |         |
|                                                                                                                                        |                                                                                     |                                          | T                                                          | 1019 ± 107                                                      | 0.96                                                 | 0.03                                              | 2E-6/0.03                                                                      |           |         |
| Untested -8G variants, used as a control for selection method                                                                          | K24X, T29X, E31X, R72X                                                              | 0.35                                     | 24, 29, 31, 72                                             | wt                                                              | K T E R                                              | 1of17                                             | N K E R                                                                        | 1of17     | N Q T R |
|                                                                                                                                        |                                                                                     |                                          |                                                            | 5of17                                                           | S H E R                                              | 1of17                                             | N T E R                                                                        | 1of17     | N T T R |
|                                                                                                                                        |                                                                                     |                                          |                                                            | 3of17                                                           | N R E R                                              | 1of17                                             | N K C S                                                                        | 1of17     | N N E R |
|                                                                                                                                        |                                                                                     |                                          |                                                            | 2of17                                                           | N Q E R                                              | 1of17                                             | N K T Q                                                                        |           |         |
| -8G_P2 K24N, L28V, T29K                                                                                                                | NA                                                                                  | NA                                       | Target                                                     | 24 ± 3                                                          | 0.94                                                 | 0.92                                              | 0.81/0.03                                                                      |           |         |
|                                                                                                                                        |                                                                                     |                                          | -8G                                                        | A                                                               | 692 ± 370                                            | 0.69                                              | 0.03                                                                           | 0.11/2E-3 |         |
|                                                                                                                                        |                                                                                     |                                          | C                                                          | 956 ± 300                                                       | ~1                                                   | 0.02                                              | 0.08/0.94                                                                      |           |         |
|                                                                                                                                        |                                                                                     |                                          | T                                                          | 750 ± 170                                                       | ~1                                                   | 0.03                                              | 9E-7/0.04                                                                      |           |         |
| -8T_P1, K24N, T29Q                                                                                                                     | NA, EC <sub>1/2max</sub> collected for -8T only = 20 nM, Thyme <i>et al.</i> , 2009 | NA                                       | Target                                                     | 5.3E-2 ± 2E-2                                                   | NA                                                   | 0.61                                              | 1E-6/7E-3                                                                      |           |         |
|                                                                                                                                        |                                                                                     |                                          | -8T                                                        | A                                                               | 1E-3 ± 9E-5                                          | NA                                                | 0.01                                                                           | 0.25/2E-4 |         |
|                                                                                                                                        |                                                                                     |                                          | C                                                          | 2E-3 ± 2E-4                                                     | NA                                                   | 0.02                                              | 0.10/0.99                                                                      |           |         |
|                                                                                                                                        |                                                                                     |                                          | G                                                          | 3.1E-2 ± 9E-3                                                   | NA                                                   | 0.36                                              | 0.65/4E-3                                                                      |           |         |
| -6C_P1, T29S, E31R, R70L                                                                                                               | NA                                                                                  | <<0.0001 for single clone                | Target                                                     | 2.7E-2 ± 3E-3                                                   | NA                                                   | 0.92                                              | 0.75/0.62                                                                      |           |         |
|                                                                                                                                        |                                                                                     |                                          | -6C                                                        | A                                                               | 4E-4 ± 8E-5                                          | NA                                                | 0.01                                                                           | 6E-7/3E-6 |         |
|                                                                                                                                        |                                                                                     |                                          | G                                                          | 1E-3 ± 8E-5                                                     | NA                                                   | 0.03                                              | 0.20/0.36                                                                      |           |         |
|                                                                                                                                        |                                                                                     |                                          | T                                                          | 1E-3 ± 2E-6                                                     | NA                                                   | 0.03                                              | 0.05/0.03                                                                      |           |         |
| -6C_C1, T22S, E31R, R70E                                                                                                               | S20X, T22X, E31X/R (2 libs), S57X, R70X                                             | 0.46/0.15 (round 2), 0.34/0.97 (round 3) | Target                                                     | 4 ± 0.3                                                         | 0.98                                                 | 0.96                                              | 0.62/0.19                                                                      |           |         |
|                                                                                                                                        |                                                                                     |                                          | -6C                                                        | A                                                               | >260                                                 | -                                                 | 0.02                                                                           | 7E-6/1E-4 |         |
|                                                                                                                                        |                                                                                     |                                          | G                                                          | >260                                                            | -                                                    | 0.02                                              | 0.32/0.72                                                                      |           |         |
|                                                                                                                                        |                                                                                     |                                          | T                                                          | 260 ± 25                                                        | 0.18                                                 | 0.02                                              | 0.06/0.09                                                                      |           |         |
| Untested -6C variants, same libraries as -6C_C1                                                                                        | 22, 31, 70                                                                          |                                          | wt T E R<br>15of20 S R E<br>2of20 S R T<br>1of20 A I T     | 1of20 C I T<br>1of20 T L T                                      |                                                      |                                                   |                                                                                |           |         |
| -6T_P1, A68Y, L69F, R70K, I71V                                                                                                         | NA                                                                                  | NA                                       | Target                                                     | 135 ± 18                                                        | 0.98                                                 | 0.16                                              | 0.10/0.05                                                                      |           |         |
|                                                                                                                                        |                                                                                     |                                          | -6T                                                        | A                                                               | 176 ± 43                                             | 0.31                                              | 0.12                                                                           | 4E-8/1E-6 |         |
|                                                                                                                                        |                                                                                     |                                          | C                                                          | >750                                                            | -                                                    | 0.03                                              | 0.22/0.34                                                                      |           |         |
|                                                                                                                                        |                                                                                     |                                          | G                                                          | 31 ± 11                                                         | ~1                                                   | 0.69                                              | 0.68/0.62                                                                      |           |         |

|                                                                    |                                                                                                                                                                                  |       |                               |                                                                                                                                                                                                                                                                                   |             |      |           |            |
|--------------------------------------------------------------------|----------------------------------------------------------------------------------------------------------------------------------------------------------------------------------|-------|-------------------------------|-----------------------------------------------------------------------------------------------------------------------------------------------------------------------------------------------------------------------------------------------------------------------------------|-------------|------|-----------|------------|
| -6T_P2, P1 mutations +<br>57-65 = GFRKRTL<br>+SGVVS+ K             | NA                                                                                                                                                                               | NA    | Target                        | 28 ± 4                                                                                                                                                                                                                                                                            | 0.99        | 0.44 | 6E-3/0.06 |            |
|                                                                    |                                                                                                                                                                                  |       | -6T                           | A                                                                                                                                                                                                                                                                                 | 208 ± 45    | 1    | 0.06      | 1E-8/2E-6  |
|                                                                    |                                                                                                                                                                                  |       |                               | C                                                                                                                                                                                                                                                                                 | 112 ± 21    | 1    | 0.11      | 0.03/0.31  |
|                                                                    |                                                                                                                                                                                  |       |                               | G                                                                                                                                                                                                                                                                                 | 32 ± 3      | 0.96 | 0.39      | 0.97/0.31  |
| -5C_C1, Y18C, S20K,<br>G33S                                        | Y18X, S20K, T22X,<br>G33X, E31X                                                                                                                                                  | 0.62  | Target                        | 138 ± 33                                                                                                                                                                                                                                                                          | ~1          | 0.48 | 0.43/0.56 |            |
|                                                                    |                                                                                                                                                                                  |       | -5C                           | A                                                                                                                                                                                                                                                                                 | 1752 ± 1091 | ~1   | 0.04      | 9E-4/3E-11 |
|                                                                    |                                                                                                                                                                                  |       |                               | G                                                                                                                                                                                                                                                                                 | 359 ± 183   | ~1   | 0.19      | 0.05/4E-5  |
|                                                                    |                                                                                                                                                                                  |       |                               | T                                                                                                                                                                                                                                                                                 | 227 ± 79    | ~1   | 0.29      | 0.51/0.44  |
| -5C_C2, Y18S, S20M,<br>G33R                                        | Y18X, S20X, G33R,<br>E31X, A68X                                                                                                                                                  | 0.62  | Target                        | 146 ± 35                                                                                                                                                                                                                                                                          | ~1          | 0.39 | 0.73/0.98 |            |
|                                                                    |                                                                                                                                                                                  |       | -5C                           | A                                                                                                                                                                                                                                                                                 | 505 ± 282   | ~1   | 0.11      | 0.03/4E-8  |
|                                                                    |                                                                                                                                                                                  |       |                               | G                                                                                                                                                                                                                                                                                 | 326 ± 87    | ~1   | 0.17      | 0.17/3E-5  |
|                                                                    |                                                                                                                                                                                  |       |                               | T                                                                                                                                                                                                                                                                                 | ~170        | -    | 0.33      | 0.08/0.01  |
| -5C_C3, Y18S, S20L,<br>G33R, A68M                                  | Y18X, S20X, G33R,<br>E31X, A68X                                                                                                                                                  | 0.62  | Target                        | 153 ± 33                                                                                                                                                                                                                                                                          | ~1          | 0.49 | 0.99/0.99 |            |
|                                                                    |                                                                                                                                                                                  |       | -5C                           | A                                                                                                                                                                                                                                                                                 | 395 ± 175   | ~1   | 0.19      | 6E-4/7E-7  |
|                                                                    |                                                                                                                                                                                  |       |                               | G                                                                                                                                                                                                                                                                                 | 543 ± 400   | ~1   | 0.14      | 2E-3/4E-8  |
|                                                                    |                                                                                                                                                                                  |       |                               | T                                                                                                                                                                                                                                                                                 | ~395        | -    | 0.19      | 8E-3/1E-3  |
| -5C_S1, Y18S, S20M,<br>G33S, S57Y, A68C                            | Y18X, S20X, G33X,<br>S57X, 59X, A68X                                                                                                                                             | 0.90  | Target                        | 125 ± 18                                                                                                                                                                                                                                                                          | ~1          | 0.10 | 0.77/0.99 |            |
|                                                                    |                                                                                                                                                                                  |       | -5C                           | A                                                                                                                                                                                                                                                                                 | 113 ± 13    | ~1   | 0.11      | 0.09/3E-4  |
|                                                                    |                                                                                                                                                                                  |       |                               | G                                                                                                                                                                                                                                                                                 | 17 ± 2      | ~1   | 0.77      | 0.07/2E-3  |
|                                                                    |                                                                                                                                                                                  |       |                               | T                                                                                                                                                                                                                                                                                 | 682 ± 192   | ~1   | 0.02      | 0.07/9E-8  |
| Untested -5C variants,<br>same libraries as above<br>5C selections | 18, 20, 31, 33, 57, 68<br>wt YSEGSA 6of26 SMERSA 1of26 SSCRSR<br>2of3 SMESYC 4of26 SKDTSA<br>1of3 CMEASA 3of26 SLERSM<br>9of26 YGERSS 3of26 CKESSA                               |       |                               |                                                                                                                                                                                                                                                                                   |             |      |           |            |
| Untested -5G variants                                              | Y18X, S20X, E31X/wt,<br>G33X, S57X/wt, 59X,<br>A68X/R                                                                                                                            | 0.65  | 18, 20, 31,<br>33, 57, 59, 68 | wt YSEGSA 1of6 T N T E S R 1of4 A Q E A S R 1of6 C V E N T R<br>2of6 A A E N S R 1of6 A N E V S R 1of4 A S E I S R 1of6 A M E C H R<br>1of6 S A E V C R 1of6 S C C D S R 2of6 S L E N S R 1of4 S S E T S R<br>1of6 C L E C S L 4of4 S A E S S R 1of6 S A E A S R 1of4 S H E N S R |             |      |           |            |
| -5T_P1, Y18F, S20T,<br>I21V, T29A, A68S                            | NA                                                                                                                                                                               | NA    | Target                        | 39 ± 10                                                                                                                                                                                                                                                                           | 0.97        | 0.50 | 0.28/0.50 |            |
|                                                                    |                                                                                                                                                                                  |       | -5T                           | A                                                                                                                                                                                                                                                                                 | 200 ± 9     | ~1   | 0.10      | 0.35/0.04  |
|                                                                    |                                                                                                                                                                                  |       |                               | C                                                                                                                                                                                                                                                                                 | 73 ± 15     | 0.94 | 0.27      | 0.17/0.46  |
|                                                                    |                                                                                                                                                                                  |       |                               | G                                                                                                                                                                                                                                                                                 | 135 ± 4     | ~1   | 0.14      | 0.20/6E-4  |
| -5T_S1, Y18C, S20M,<br>G33S                                        | Y18X, S20X, G33X,<br>S57X, 59X, A68X                                                                                                                                             | 0.53  | Target                        | 64 ± 3                                                                                                                                                                                                                                                                            | 0.94        | 0.16 | 0.54/0.43 |            |
|                                                                    |                                                                                                                                                                                  |       | -5T                           | A                                                                                                                                                                                                                                                                                 | 507 ± 327   | ~1   | 0.02      | 0.01/6E-5  |
|                                                                    |                                                                                                                                                                                  |       |                               | C                                                                                                                                                                                                                                                                                 | 20 ± 1      | ~1   | 0.50      | 0.38/0.57  |
|                                                                    |                                                                                                                                                                                  |       |                               | G                                                                                                                                                                                                                                                                                 | 30 ± 2      | ~1   | 0.33      | 0.07/1E-3  |
| -4C_C1, Y18C, G33K,<br>R59T, A68R                                  | Y18X, S20X, G33K,<br>R59X, A68X                                                                                                                                                  | 0.46  | Target                        | 100 ± 14                                                                                                                                                                                                                                                                          | ~1          | 0.47 | 0.75/0.97 |            |
|                                                                    |                                                                                                                                                                                  |       | -4C                           | A                                                                                                                                                                                                                                                                                 | 2433 ± 4431 | ~1   | 0.02      | 6E-3/4E-4  |
|                                                                    |                                                                                                                                                                                  |       |                               | G                                                                                                                                                                                                                                                                                 | 627 ± 267   | ~1   | 0.07      | 0.25/0.03  |
|                                                                    |                                                                                                                                                                                  |       |                               | T                                                                                                                                                                                                                                                                                 | 97 ± 22     | ~1   | 0.48      | 2E-8/7E-5  |
| -4C_C2, Y18C, G33K,<br>R59S                                        | Y18X, S20X, G33K,<br>R59X, A68X                                                                                                                                                  | 0.46  | Target                        | 126 ± 20                                                                                                                                                                                                                                                                          | ~1          | 0.55 | 0.62/0.94 |            |
|                                                                    |                                                                                                                                                                                  |       | -4C                           | A                                                                                                                                                                                                                                                                                 | 876 ± 1130  | ~1   | 0.08      | 0.11/9E-3  |
|                                                                    |                                                                                                                                                                                  |       |                               | G                                                                                                                                                                                                                                                                                 | 1078 ± 1434 | ~1   | 0.06      | 0.27/0.05  |
|                                                                    |                                                                                                                                                                                  |       |                               | T                                                                                                                                                                                                                                                                                 | 226 ± 55    | ~1   | 0.31      | 5E-7/7E-5  |
| Untested -4C variants,<br>same library as -4C_C1<br>and C2         | 18, 20, 33, 35, 59, 68<br>wt YSGERA 3of26 CSKESR 1of26 CSKESQ<br>7of26 CSKESA 2of26 MSRESA 3of4 FSGAER<br>6of26 TSKETR 2of26 MSREQA 1of4 FSRAR<br>4of26 CSKFAA 1of26 YCKESA      |       |                               |                                                                                                                                                                                                                                                                                   |             |      |           |            |
| -4T_S1, Y18G, S20Y,<br>G33S, R59A, A68R                            | Y18X, S20X, G33X,<br>R59X, A68X                                                                                                                                                  | <0.01 | Target                        | 993 ± 488                                                                                                                                                                                                                                                                         | ~1          | 0.35 | 4E-8/4E-5 |            |
|                                                                    |                                                                                                                                                                                  |       | -4T                           | A                                                                                                                                                                                                                                                                                 | >1605       | NA   | 0.22      | 0.38/0.21  |
|                                                                    |                                                                                                                                                                                  |       |                               | C                                                                                                                                                                                                                                                                                 | 1605 ± 1210 | ~1   | 0.22      | 0.57/0.45  |
|                                                                    |                                                                                                                                                                                  |       |                               | G                                                                                                                                                                                                                                                                                 | >1605       | NA   | 0.22      | 0.05/0.34  |
| -3A_S1, Y18W, E35A,<br>58-65 = LRQHNRG-                            | Y18W, E35K, 58X, 60X,<br>61-65, 62-65 X or<br>deleted                                                                                                                            | >1    | Target                        | 177 ± 38                                                                                                                                                                                                                                                                          | ~1          | 0.31 | 5E-6/0.01 |            |
|                                                                    |                                                                                                                                                                                  |       | -3A                           | C                                                                                                                                                                                                                                                                                 | 240 ± 46    | 0.99 | 0.23      | 0.02/0.25  |
|                                                                    |                                                                                                                                                                                  |       |                               | G                                                                                                                                                                                                                                                                                 | 205 ± 34    | ~1   | 0.26      | 0.96/0.53  |
|                                                                    |                                                                                                                                                                                  |       |                               | T                                                                                                                                                                                                                                                                                 | 259 ± 79    | 0.99 | 0.21      | 0.02/0.20  |
| Untested -3A variants,<br>same library as -3A_S1                   | 18, 35, 58-66<br>wt YEFRRNFIEM 1 WGERTDQ -- M 1 WSYRRHTN -- M<br>6 WALRQHGRGM 1 WAVRPNG -- M 1 WCMRVDTSS -- M<br>3 WSYRPKLE -- M 1 WAVRAETN -- M<br>1 WAFRKEPP - M 1 WAHRHSTST M |       |                               |                                                                                                                                                                                                                                                                                   |             |      |           |            |
| -3C_P1, Y18W, E35K,<br>R61Q                                        | NA                                                                                                                                                                               | 0     | Target                        | 1.2E-2 ± 1E-4                                                                                                                                                                                                                                                                     | NA          | 0.76 | 0.75/0.85 |            |
|                                                                    |                                                                                                                                                                                  |       | -3C                           | A                                                                                                                                                                                                                                                                                 | 2E-3 ± 8E-5 | NA   | 0.13      | 1E-5/2E-3  |
|                                                                    |                                                                                                                                                                                  |       |                               | G                                                                                                                                                                                                                                                                                 | 1E-3 ± 3E-5 | NA   | 0.06      | 0.24/0.07  |
|                                                                    |                                                                                                                                                                                  |       |                               | T                                                                                                                                                                                                                                                                                 | 7E-4 ± 7E-5 | NA   | 0.05      | 0.02/0.09  |

|                                                         |                                                |                                                                                                                                                                                                                                                                                                                                                                                                                                                                                                                                                                                                            |        |             |           |       |           |           |
|---------------------------------------------------------|------------------------------------------------|------------------------------------------------------------------------------------------------------------------------------------------------------------------------------------------------------------------------------------------------------------------------------------------------------------------------------------------------------------------------------------------------------------------------------------------------------------------------------------------------------------------------------------------------------------------------------------------------------------|--------|-------------|-----------|-------|-----------|-----------|
| -3C_C1, Y18W, E35K, (58-65) = YREQDG--                  | Y18W, E35K, 58X, 60X, 61VA, 62-65 X or deleted | 0.23<br>(round 3),<br>0.72<br>(round 4)                                                                                                                                                                                                                                                                                                                                                                                                                                                                                                                                                                    | Target | 24          | 0.95      | 0.90  | 0.83/0.83 |           |
|                                                         |                                                |                                                                                                                                                                                                                                                                                                                                                                                                                                                                                                                                                                                                            | -3C    | A           | 476       | ~1    | 0.05      | 6E-6/2E-3 |
|                                                         |                                                |                                                                                                                                                                                                                                                                                                                                                                                                                                                                                                                                                                                                            | G      | 1413        | ~1        | 0.02  | 0.16/0.08 |           |
|                                                         |                                                |                                                                                                                                                                                                                                                                                                                                                                                                                                                                                                                                                                                                            | T      | >476        | -         | 0.05  | 6E-3/0.09 |           |
| -3C_C2, Y18W, E35K, (58-65) = FRPDG---                  | Y18W, E35K, 58X, 60X, 61VA, 62-65 X or deleted | 0.28<br>(round 3),<br>0.81<br>(round 4)                                                                                                                                                                                                                                                                                                                                                                                                                                                                                                                                                                    | Target | 7           | 0.98      | 0.88  | 0.48/0.87 |           |
|                                                         |                                                |                                                                                                                                                                                                                                                                                                                                                                                                                                                                                                                                                                                                            | -3C    | A           | 82        | ~1    | 0.08      | 3E-5/1E-3 |
|                                                         |                                                |                                                                                                                                                                                                                                                                                                                                                                                                                                                                                                                                                                                                            | G      | 259         | ~1        | 0.02  | 0.51/0.05 |           |
|                                                         |                                                |                                                                                                                                                                                                                                                                                                                                                                                                                                                                                                                                                                                                            | T      | 331         | ~1        | 0.02  | 0.01/0.08 |           |
| Untested -3C variants, same libraries as -3C_C1 and _C2 | 58-66                                          | $wt$ FRKRNEIEM<br>$3of10$ FRPDG---M<br>$1$ IRPDG---M<br>$1$ VRKDG---M<br>$1$ FRNDG---M<br>$2of13$ YREQDG---M<br>$1$ FRKCG---M<br>$1$ FRPHG---M<br>$1$ FRSDG---M<br>$1$ MRPDN---M<br>$1$ YRPNCG---M<br>$1$ TREKCG---M<br>$1$ IRDGCR---M<br>$1$ IRPHCG---M<br>$1$ FRPETN---M<br>$1$ YRPNCG---M<br>$1$ YRKNDG---M<br>$1$ YRHDG---M<br>$1$ VRSDG---M<br>$1$ FRAHCG---M<br>$1$ ERDDN---M<br>$1$ FRPECG---M<br>$1of2$ FREDGGG---M<br>$1$ VRPDGNG---M<br>$1of9$ HRMEGGRGM<br>$1$ FRIERAGEM<br>$1$ ERLESGRWM<br>$1$ YRDEGRKGM<br>$1$ TRTEGARDM<br>$1$ QRGEGKHAM<br>$1$ VRGEGCRTM<br>$1$ YRSDNGRCM<br>$1$ YRWEGRKRM |        |             |           |       |           |           |
| -3T_S1, Y18W, E35S, 58-65 = HRHDD---                    | Y18W, E35K, 58X, 60X, 61VA, 62-65 X or deleted | 0.25                                                                                                                                                                                                                                                                                                                                                                                                                                                                                                                                                                                                       | Target | 254 ± 96    | ~1        | 0.36  | 0.02/0.20 |           |
|                                                         |                                                |                                                                                                                                                                                                                                                                                                                                                                                                                                                                                                                                                                                                            | -3T    | A           | >448      | -     | 0.21      | 9E-6/0.02 |
|                                                         |                                                |                                                                                                                                                                                                                                                                                                                                                                                                                                                                                                                                                                                                            | C      | 448 ± 179   | ~1        | 0.21  | 0.05/0.25 |           |
|                                                         |                                                |                                                                                                                                                                                                                                                                                                                                                                                                                                                                                                                                                                                                            | G      | 404 ± 163   | ~1        | 0.23  | 0.93/0.54 |           |
| Untested -3T variants, same library as -3T_S1           | 18, 35, 58-66                                  | $wt$ YEFKRNEIEM<br>$8of11$ WSHRHDD---M<br>$3of11$ WAHRHDD---M                                                                                                                                                                                                                                                                                                                                                                                                                                                                                                                                              |        |             |           |       |           |           |
| +3A_S1, A170N, D194A, K200C                             | C150X, A170X, D194X, K200X                     | 0.41                                                                                                                                                                                                                                                                                                                                                                                                                                                                                                                                                                                                       | Target | 189 ± 38    | ~1        | 0.42  | 0.03/0.13 |           |
|                                                         |                                                |                                                                                                                                                                                                                                                                                                                                                                                                                                                                                                                                                                                                            | +3A    | C           | 454 ± 98  | ~1    | 0.17      | 0.77/0.57 |
|                                                         |                                                |                                                                                                                                                                                                                                                                                                                                                                                                                                                                                                                                                                                                            | G      | 331 ± 129   | 0.77      | 0.24  | 0.03/0.12 |           |
|                                                         |                                                |                                                                                                                                                                                                                                                                                                                                                                                                                                                                                                                                                                                                            | T      | >454        | -         | 0.17  | 0.17/0.17 |           |
| Untested +3A variants, same library as +3A_S1           | 170, 192, 194, 200                             | $wt$ AYDK<br>$9of15$ LYAV<br>$2of15$ NYAC<br>$2of15$ CYAS<br>$1of15$ SYAV<br>$1of15$ CSRS                                                                                                                                                                                                                                                                                                                                                                                                                                                                                                                  |        |             |           |       |           |           |
| +3C_P1, I164V, K200N                                    | NA                                             | NA                                                                                                                                                                                                                                                                                                                                                                                                                                                                                                                                                                                                         | Target | 14 ± 6      | 0.93      | 0.28  | 0.49/0.37 |           |
|                                                         |                                                |                                                                                                                                                                                                                                                                                                                                                                                                                                                                                                                                                                                                            | +3C    | A           | 146 ± 5   | 0.85  | 0.03      | 0.03/0.10 |
|                                                         |                                                |                                                                                                                                                                                                                                                                                                                                                                                                                                                                                                                                                                                                            | G      | 155 ± 13    | 0.67      | 0.03  | 0.05/0.07 |           |
|                                                         |                                                |                                                                                                                                                                                                                                                                                                                                                                                                                                                                                                                                                                                                            | T      | 6 ± 0.3     | 0.98      | 0.55  | 0.43/0.46 |           |
| +3C_S1, A170E, D194K, K200A                             | C150X, A170X, D194X, K200X                     | 0.59                                                                                                                                                                                                                                                                                                                                                                                                                                                                                                                                                                                                       | Target | 145 ± 33    | ~1        | 0.73  | 0.93/0.72 |           |
|                                                         |                                                |                                                                                                                                                                                                                                                                                                                                                                                                                                                                                                                                                                                                            | +3C    | A           | >1407     | -     | 0.08      | 0.03/0.14 |
|                                                         |                                                |                                                                                                                                                                                                                                                                                                                                                                                                                                                                                                                                                                                                            | G      | 888 ± ?     | 0.09      | 0.12  | 0.04/0.14 |           |
|                                                         |                                                |                                                                                                                                                                                                                                                                                                                                                                                                                                                                                                                                                                                                            | T      | 1407 ± 931  | 0.58      | 0.08  | 0.01/8E-5 |           |
| +3C_S2, A170E, D194G, K200R                             | C150X, A170X, D194X, K200X                     | >1                                                                                                                                                                                                                                                                                                                                                                                                                                                                                                                                                                                                         | Target | 288 ± 68    | 0.97      | 0.64  | 0.66/0.10 |           |
|                                                         |                                                |                                                                                                                                                                                                                                                                                                                                                                                                                                                                                                                                                                                                            | +3C    | A           | >1500     | -     | 0.12      | 0.03/0.21 |
|                                                         |                                                |                                                                                                                                                                                                                                                                                                                                                                                                                                                                                                                                                                                                            | G      | >1500       | -         | 0.12  | 0.12/0.68 |           |
|                                                         |                                                |                                                                                                                                                                                                                                                                                                                                                                                                                                                                                                                                                                                                            | T      | >1500       | -         | 0.12  | 0.19/3E-3 |           |
| Untested +3C variants, same library as +3C_S1 and S2    | 170, 192, 194, 200                             | $wt$ AYDK<br>$2of13$ EYAV<br>$2of13$ EYAC<br>$2of13$ EYGR<br>$2of13$ WYGA<br>$2of13$ EYAV<br>$1of13$ EYSR<br>$1of13$ EYKA<br>$1of13$ TYCN<br>$7of7$ WRAV                                                                                                                                                                                                                                                                                                                                                                                                                                                   |        |             |           |       |           |           |
| +3G_S1, A170K, Y192G, K200V                             | C150X, A170X, D194X, K200X                     | 0.62                                                                                                                                                                                                                                                                                                                                                                                                                                                                                                                                                                                                       | Target | 240 ± 61    | 0.83      | 0.68  | 0.06/0.54 |           |
|                                                         |                                                |                                                                                                                                                                                                                                                                                                                                                                                                                                                                                                                                                                                                            | +3G    | A           | >1500     | -     | 0.11      | 0.02/0.43 |
|                                                         |                                                |                                                                                                                                                                                                                                                                                                                                                                                                                                                                                                                                                                                                            | C      | >1500       | -         | 0.11  | 0.33/0.03 |           |
|                                                         |                                                |                                                                                                                                                                                                                                                                                                                                                                                                                                                                                                                                                                                                            | T      | >1500       | -         | 0.11  | 0.58/1E-9 |           |
| +3G_S2, A170V, D194S, K200R                             | C150X, A170X, D194X, K200X                     | 0.40                                                                                                                                                                                                                                                                                                                                                                                                                                                                                                                                                                                                       | Target | 1245 ± 1173 | ~1        | ~0.25 | 0.28/0.45 |           |
|                                                         |                                                |                                                                                                                                                                                                                                                                                                                                                                                                                                                                                                                                                                                                            | +3G    | A           | >1318     | -     | ~0.25     | 0.03/0.07 |
|                                                         |                                                |                                                                                                                                                                                                                                                                                                                                                                                                                                                                                                                                                                                                            | C      | >1318       | -         | ~0.25 | 0.40/0.07 |           |
|                                                         |                                                |                                                                                                                                                                                                                                                                                                                                                                                                                                                                                                                                                                                                            | T      | 1318 ± 1100 | 0.21      | ~0.25 | 0.29/0.41 |           |
| +3G_S3, A170V, D194G, K200R                             | C150X, A170X, D194X, K200X                     | 0.82                                                                                                                                                                                                                                                                                                                                                                                                                                                                                                                                                                                                       | Target | 697 ± 296   | 0.80      | ~0.25 | 0.29/0.40 |           |
|                                                         |                                                |                                                                                                                                                                                                                                                                                                                                                                                                                                                                                                                                                                                                            | +3G    | A           | >686      | -     | ~0.25     | 0.02/0.07 |
|                                                         |                                                |                                                                                                                                                                                                                                                                                                                                                                                                                                                                                                                                                                                                            | C      | >686        | -         | ~0.25 | 0.41/0.08 |           |
|                                                         |                                                |                                                                                                                                                                                                                                                                                                                                                                                                                                                                                                                                                                                                            | T      | 686 ± 158   | 0.24      | ~0.25 | 0.28/0.45 |           |
| Untested +3G variants, same library as +3G_S1-S3        | 170, 192, 194, 200                             | $wt$ AYDK<br>$8of22$ NYAC<br>$5of22$ LWDR<br>$3of22$ KYAC<br>$3of22$ VYSR<br>$2of22$ KGDR<br>$1of22$ VYGR                                                                                                                                                                                                                                                                                                                                                                                                                                                                                                  |        |             |           |       |           |           |
| +4A_S1, C150S, D168G, I178V, K200Y                      | C150X, D168X, Y192X, D194X, K200X              | 0.53                                                                                                                                                                                                                                                                                                                                                                                                                                                                                                                                                                                                       | Target | 35 ± 5      | 0.99      | 0.38  | 4E-3/2E-3 |           |
|                                                         |                                                |                                                                                                                                                                                                                                                                                                                                                                                                                                                                                                                                                                                                            | +4A    | C           | 984 ± 475 | 0.87  | 0.01      | 0.41/0.08 |
|                                                         |                                                |                                                                                                                                                                                                                                                                                                                                                                                                                                                                                                                                                                                                            | G      | 33 ± 4      | 0.99      | 0.40  | 0.26/0.05 |           |
|                                                         |                                                |                                                                                                                                                                                                                                                                                                                                                                                                                                                                                                                                                                                                            | T      | 63 ± 9      | 0.95      | 0.21  | 0.32/0.87 |           |

|                                                    |                                   |                                                                                                                                                                                                                                                                                                                                          |        |          |            |      |           |           |
|----------------------------------------------------|-----------------------------------|------------------------------------------------------------------------------------------------------------------------------------------------------------------------------------------------------------------------------------------------------------------------------------------------------------------------------------------|--------|----------|------------|------|-----------|-----------|
| +4A_S2, D168S, Y192V, D194M, K200I                 | D168X, Y192X, D194X, K200X        | 0.67                                                                                                                                                                                                                                                                                                                                     | Target | 115 ± 16 | 0.99       | 0.29 | 2E-3/9E-4 |           |
|                                                    |                                   |                                                                                                                                                                                                                                                                                                                                          | +4A    | C        | 492 ± 20   | 0.39 | 0.07      | 0.32/0.23 |
|                                                    |                                   |                                                                                                                                                                                                                                                                                                                                          |        | G        | 79 ± 13    | ~1   | 0.43      | 0.58/0.34 |
|                                                    |                                   |                                                                                                                                                                                                                                                                                                                                          |        | T        | 159 ± 28   | 0.85 | 0.21      | 0.10/0.43 |
| +4A_S3, D168A, K190R, K200L                        | C150X, D168X, Y192X, D194X, K200X | 0.53                                                                                                                                                                                                                                                                                                                                     | Target | 96 ± 10  | ~1         | 0.21 | 3E-3/1E-3 |           |
|                                                    |                                   |                                                                                                                                                                                                                                                                                                                                          | +4A    | C        | 316 ± 31   | 0.83 | 0.07      | 0.28/0.20 |
|                                                    |                                   |                                                                                                                                                                                                                                                                                                                                          |        | G        | 77 ± 9     | ~1   | 0.27      | 0.58/0.44 |
|                                                    |                                   |                                                                                                                                                                                                                                                                                                                                          |        | T        | 45 ± 4     | ~1   | 0.46      | 0.14/0.36 |
| Untested +4A variants, same libraries as +4A_S1-S3 | 150, 168, 192, 194, 200           | wt <b>C D Y D K</b> <i>1of18</i> <b>S G Y D M</b> <i>1of18</i> <b>C A G D L</b><br><i>8of18</i> <b>C N Y D A</b> <i>1of18</i> <b>S G Y D Y</b> <i>1of18</i> <b>C N G C I</b><br><i>2of18</i> <b>C N G A T</b> <i>1of18</i> <b>C A Y D R</b> <i>1of18</i> <b>C S A Y L</b><br><i>1of18</i> <b>C S V M I</b> <i>1of18</i> <b>C A Y D L</b> |        |          |            |      |           |           |
| +4G_S1, D168S, Y192G, D194G, K200Y                 | D168X, Y192X, D194X, K200X        | 0.31                                                                                                                                                                                                                                                                                                                                     | Target | 89 ± 23  | ~1         | 0.36 | 0.53/0.93 |           |
|                                                    |                                   |                                                                                                                                                                                                                                                                                                                                          | +4G    | A        | 140 ± 36   | 0.86 | 0.23      | 6E-3/2E-3 |
|                                                    |                                   |                                                                                                                                                                                                                                                                                                                                          |        | C        | 147 ± 34   | 0.51 | 0.22      | 0.43/0.06 |
|                                                    |                                   |                                                                                                                                                                                                                                                                                                                                          |        | T        | 161 ± 52   | 0.64 | 0.21      | 0.03/7E-3 |
| +4G_S2, D168S, Y192V, D194G, K200V                 | D168X, Y192X, D194X, K200X        | 0.31                                                                                                                                                                                                                                                                                                                                     | Target | 69 ± 17  | ~1         | 0.38 | 0.11/0.47 |           |
|                                                    |                                   |                                                                                                                                                                                                                                                                                                                                          | +4G    | A        | 90 ± 18    | ~1   | 0.29      | 3E-3/2E-3 |
|                                                    |                                   |                                                                                                                                                                                                                                                                                                                                          |        | C        | 165 ± 24   | 0.77 | 0.16      | 0.29/0.19 |
|                                                    |                                   |                                                                                                                                                                                                                                                                                                                                          |        | T        | 144 ± 37   | 0.90 | 0.18      | 0.60/0.34 |
| +4G_S3, D168G, Y192G, K200R                        | D168X, Y192X, D194X, K200X        | 0.31                                                                                                                                                                                                                                                                                                                                     | Target | 278 ± 26 | ~1         | 0.43 | 0.40/0.53 |           |
|                                                    |                                   |                                                                                                                                                                                                                                                                                                                                          | +4G    | A        | 440 ± 66   | 0.97 | 0.27      | 3E-3/2E-3 |
|                                                    |                                   |                                                                                                                                                                                                                                                                                                                                          |        | C        | 837 ± 84   | 0.79 | 0.14      | 0.20/0.26 |
|                                                    |                                   |                                                                                                                                                                                                                                                                                                                                          |        | T        | 797 ± 147  | 0.93 | 0.15      | 0.39/0.21 |
| +4G_S4, D168A, Y192A, D194W, K200V                 | D168X, Y192X, D194X, K200X        | 0.28                                                                                                                                                                                                                                                                                                                                     | Target | 177 ± 35 | 0.76       | 0.19 | 2E-3/2E-3 |           |
|                                                    |                                   |                                                                                                                                                                                                                                                                                                                                          | +4G    | A        | 216 ± 29   | 0.96 | 0.16      | 0.02/0.01 |
|                                                    |                                   |                                                                                                                                                                                                                                                                                                                                          |        | C        | 986 ± 282  | 0.20 | 0.03      | 0.71/0.77 |
|                                                    |                                   |                                                                                                                                                                                                                                                                                                                                          |        | T        | 55 ± 4     | 0.99 | 0.62      | 0.26/0.22 |
| +4G_S5, D168N, Y192V, K200C                        | D168X, Y192X, D194X, K200X        | 0.31                                                                                                                                                                                                                                                                                                                                     | Target | 55 ± 5   | ~1         | 0.50 | 0.35/0.72 |           |
|                                                    |                                   |                                                                                                                                                                                                                                                                                                                                          | +4G    | A        | 81 ± 33    | ~1   | 0.34      | 0.02/5E-3 |
|                                                    |                                   |                                                                                                                                                                                                                                                                                                                                          |        | C        | 571 ± 188  | ~1   | 0.05      | 0.59/0.27 |
|                                                    |                                   |                                                                                                                                                                                                                                                                                                                                          |        | T        | 228 ± 19   | ~1   | 0.12      | 0.03/2E-5 |
| +4G_S6, D168N, Y192C, D194G, K200V                 | D168X, Y192X, D194X, K200X        | 0.28                                                                                                                                                                                                                                                                                                                                     | Target | 108 ± 14 | 0.99       | 0.37 | 0.49/0.72 |           |
|                                                    |                                   |                                                                                                                                                                                                                                                                                                                                          | +4G    | A        | 127 ± 8    | 0.88 | 0.31      | 0.02/2E-3 |
|                                                    |                                   |                                                                                                                                                                                                                                                                                                                                          |        | C        | 337 ± 58   | 0.25 | 0.12      | 0.48/0.28 |
|                                                    |                                   |                                                                                                                                                                                                                                                                                                                                          |        | T        | 192 ± 55   | 0.27 | 0.21      | 0.03/3E-5 |
| Untested +4G variants, same libraries as +4G_S1-S6 | 168, 192, 194, 200                | wt <b>D Y D K</b> <i>1of11</i> <b>S G G Y</b><br><i>3of11</i> <b>A A W V</b> <i>1of11</i> <b>S V G V</b><br><i>2of11</i> <b>M Y D R</b> <i>1of11</i> <b>G G D R</b><br><i>2of11</i> <b>N C G V</b> <i>1of11</i> <b>N V D C</b>                                                                                                           |        |          |            |      |           |           |
| +4T_P1, K200R, also increases activity on +3G      | NA                                | NA                                                                                                                                                                                                                                                                                                                                       | Target | 17 ± 5   | 0.95       | 0.27 | 8E-3/8E-6 |           |
|                                                    |                                   |                                                                                                                                                                                                                                                                                                                                          | +4T    | A        | 118 ± 4    | ~1   | 0.04      | 9E-3/8E-4 |
|                                                    |                                   |                                                                                                                                                                                                                                                                                                                                          |        | C        | 7 ± 1      | 0.98 | 0.64      | 0.69/0.56 |
|                                                    |                                   |                                                                                                                                                                                                                                                                                                                                          |        | G        | 115 ± 9    | ~1   | 0.04      | 0.29/0.44 |
| +4T_S1, D168A, Y192T, D194A, K200F                 | D168X, Y192X, D194X, K200X        | 0.34                                                                                                                                                                                                                                                                                                                                     | Target | 161 ± 16 | 0.97       | 0.58 | 0.65/0.54 |           |
|                                                    |                                   |                                                                                                                                                                                                                                                                                                                                          | +4T    | A        | 401 ± 63   | 0.96 | 0.23      | 2E-3/1E-3 |
|                                                    |                                   |                                                                                                                                                                                                                                                                                                                                          |        | C        | 1016 ± 122 | 0.34 | 0.09      | 0.26/0.15 |
|                                                    |                                   |                                                                                                                                                                                                                                                                                                                                          |        | G        | 903 ± 403  | 0.67 | 0.10      | 0.09/0.31 |
| +4T_S2, D168A, Y192S, K200F                        | D168X, Y192X, D194X, K200X        | 0.34                                                                                                                                                                                                                                                                                                                                     | Target | 100 ± 19 | ~1         | 0.40 | 0.67/0.52 |           |
|                                                    |                                   |                                                                                                                                                                                                                                                                                                                                          | +4T    | A        | 173 ± 48   | ~1   | 0.23      | 3E-3/2E-3 |
|                                                    |                                   |                                                                                                                                                                                                                                                                                                                                          |        | C        | 478 ± 67   | 0.80 | 0.08      | 0.25/0.14 |
|                                                    |                                   |                                                                                                                                                                                                                                                                                                                                          |        | G        | 135 ± 27   | ~1   | 0.29      | 0.09/0.34 |
| +4T_S3, D168A, Y192H, K200L                        | D168X, Y192X, D194X, K200X        | 0.34                                                                                                                                                                                                                                                                                                                                     | Target | 87 ± 11  | 0.98       | 0.65 | 0.57/0.43 |           |
|                                                    |                                   |                                                                                                                                                                                                                                                                                                                                          | +4T    | A        | 421 ± 326  | 0.97 | 0.13      | 3E-3/1E-3 |
|                                                    |                                   |                                                                                                                                                                                                                                                                                                                                          |        | C        | 485 ± 135  | 0.37 | 0.12      | 0.29/0.19 |
|                                                    |                                   |                                                                                                                                                                                                                                                                                                                                          |        | G        | 525 ± 111  | 0.72 | 0.11      | 0.14/0.38 |
| +4T_S4, D168G, Y192W, D194A, K200Y                 | D168X, Y192X, D194X, K200X        | 0.34                                                                                                                                                                                                                                                                                                                                     | Target | 51 ± 6   | ~1         | 0.54 | 0.25/0.56 |           |
|                                                    |                                   |                                                                                                                                                                                                                                                                                                                                          | +4T    | A        | 193 ± 58   | ~1   | 0.14      | 6E-3/7E-5 |
|                                                    |                                   |                                                                                                                                                                                                                                                                                                                                          |        | C        | 480 ± 76   | 0.71 | 0.06      | 0.41/0.29 |
|                                                    |                                   |                                                                                                                                                                                                                                                                                                                                          |        | G        | 109 ± 19   | ~1   | 0.26      | 0.34/0.15 |
| +4T_S5, D168A, Y192V, D194L, K200L                 | D168X, Y192X, D194X, K200X        | 0.96                                                                                                                                                                                                                                                                                                                                     | Target | 83 ± 6   | 0.97       | 0.56 | 0.61/0.40 |           |
|                                                    |                                   |                                                                                                                                                                                                                                                                                                                                          | +4T    | A        | 229 ± 19   | 0.96 | 0.20      | 3E-3/2E-3 |
|                                                    |                                   |                                                                                                                                                                                                                                                                                                                                          |        | C        | 728 ± 272  | 0.16 | 0.06      | 0.28/0.18 |
|                                                    |                                   |                                                                                                                                                                                                                                                                                                                                          |        | G        | 266 ± 74   | 0.77 | 0.18      | 0.12/0.42 |

|                                                           |                                            |      |        |           |            |              |              |              |
|-----------------------------------------------------------|--------------------------------------------|------|--------|-----------|------------|--------------|--------------|--------------|
| +4T_S6, D168A                                             | C150X, D168X, Y192X, D194X, K200X          | 0.50 | Target | 30 ± 2    | 0.99       | 0.41         | 0.43/0.42    |              |
|                                                           |                                            |      | +4T    | A         | 97 ± 10    | ~1           | 0.13         | 5E-3/2E-3    |
|                                                           |                                            |      |        | C         | 57 ± 8     | 0.94         | 0.22         | 0.51/0.40    |
|                                                           |                                            |      |        | G         | 49 ± 5     | 0.96         | 0.25         | 0.06/0.18    |
| Untested +4T variants, same libraries as +4T_S1-S6        | 168, 192, 194, 200                         |      |        | wt        | DYDK       | 2of15 AHDL   | 1of15 GWAY   | 3of6 KLQH    |
|                                                           |                                            |      |        | 3of15     | AYDK       | 1of15 ASDF   | 1of15 CCLC   |              |
|                                                           |                                            |      |        | 2of15     | ACLK       | 1of15 ATAF   | 1of15 AGDL   |              |
|                                                           |                                            |      |        | 2of15     | AVLL       | 1of15 AVAF   | 3of6 KADH    |              |
| +5A_C1, S152G, S166A, D168Q                               | S152X, Y154X, S166X, D168Q, K202X          | 0.11 | Target | 668 ± 320 | ~1         | 0.15         | 2E-16/1E-11  |              |
|                                                           |                                            |      | +5A    | C         | 943 ± 744  | 0.57         | 0.10         | 0.34/0.04    |
|                                                           |                                            |      |        | G         | 165 ± 20   | ~1           | 0.60         | 0.50/0.94    |
|                                                           |                                            |      |        | T         | 644 ± 191  | 0.93         | 0.15         | 0.16/0.02    |
| +5A_C2, S166A, D168S, T189P, K202Q                        | S166X, D168X, T189X, T204X, K202Q          | 0.38 | Target | 249 ± 64  | 0.94       | 0.25         | 1E-16/5E-12  |              |
|                                                           |                                            |      | +5A    | C         | 229 ± 52   | 0.92         | 0.27         | 0.63/0.35    |
|                                                           |                                            |      |        | G         | >375       | -            | 0.17         | 0.12/0.31    |
|                                                           |                                            |      |        | T         | 203 ± 52   | 0.91         | 0.31         | 0.26/0.35    |
| +5A_S1, D168Q                                             | S152X, D168X, Y192X, K202X                 | 0.47 | Target | 85 ± 8    | ~1         | 0.19         | 7E-17/4E-11  |              |
|                                                           |                                            |      | +5A    | C         | 361 ± 60   | 0.71         | 0.05         | 0.31/0.05    |
|                                                           |                                            |      |        | G         | 24 ± 1     | 0.98         | 0.67         | 0.60/0.94    |
|                                                           |                                            |      |        | T         | 179 ± 42   | ~1           | 0.09         | 0.09/0.02    |
| +5A_S2, S152C, D168E, N226S                               | S152X, D168X, Y192X, K202X                 | 0.47 | Target | 539 ± 93  | 0.61       | 0.04         | 1E-16/6E-12  |              |
|                                                           |                                            |      | +5A    | C         | 26 ± 4     | 0.95         | 0.77         | 0.44/0.24    |
|                                                           |                                            |      |        | G         | 115 ± 15   | ~1           | 0.17         | 0.48/0.75    |
|                                                           |                                            |      |        | T         | 1056 ± 318 | 0.55         | 0.02         | 0.08/7E-3    |
| +5A_S3, S152I, D168E                                      | S152X, D168X, Y192X, K202X                 | 0.27 | Target | 597 ± 243 | 0.89       | 0.02         | 5E-17/1E-10  |              |
|                                                           |                                            |      | +5A    | C         | 19 ± 1     | 0.98         | 0.58         | 0.31/0.05    |
|                                                           |                                            |      |        | G         | 28 ± 3     | 0.97         | 0.39         | 0.69/0.95    |
|                                                           |                                            |      |        | T         | 1008 ± 281 | 0.75         | 0.01         | 2E-4/1E-6    |
| +5A_S4, D168E                                             | S152X, D168X, Y192X, K202X                 | 0.47 | Target | 674 ± 335 | ~1         | 0.02         | 5E-16/3E-11  |              |
|                                                           |                                            |      | +5A    | C         | 20 ± 2     | 0.97         | 0.61         | 0.41/0.17    |
|                                                           |                                            |      |        | G         | 35 ± 6     | 0.95         | 0.35         | 0.47/0.80    |
|                                                           |                                            |      |        | T         | 611 ± 115  | 0.81         | 0.02         | 0.13/0.03    |
| Untested +5A variants, same libraries as all +5A variants | 152, 166, 168, 189, 202, 204               |      |        | wt        | SSDTKT     | 2of11 CAQTKT | 1of5 SASPQT  | 1of14 CSETKT |
|                                                           |                                            |      |        | 3of11     | TAQTKT     | 1of11 TSQTKT | 1of5 SAAPQT  | 1of14 VSETKT |
|                                                           |                                            |      |        | 2of11     | SAQTKT     | 1of11 GHQTKT | 8of14 ISETKT | 1of14 SSETKT |
|                                                           |                                            |      |        | 2of11     | GAQTKT     | 3of5 SASPQA  | 2of14 SSQTKT | 1of14 LSETKT |
| +5C_C1, S152T, D168E, Y192R                               | S152X, S166X, D168X, Y192R/K (2 libraries) | 0.51 | Target | 116 ± 18  | 0.97       | 0.48         | 0.39/0.18    |              |
|                                                           |                                            |      | +5C    | A         | 436 ± 325  | 0.41         | 0.13         | 2E-3/2E-14   |
|                                                           |                                            |      |        | G         | 164 ± 48   | 0.90         | 0.34         | 0.61/0.82    |
|                                                           |                                            |      |        | T         | 1042 ± 798 | ~1           | 0.05         | 1E-4/5E-4    |
| Untested +5C variants, same library as +5C_C1             | 152, 166, 168, 192                         |      |        | wt        | SSDY       | 2of20 ISEK   | 1of20 CCCK   | 1of20 CFCK   |
|                                                           |                                            |      |        | 15of16    | PSEY       | 2of20 TSEK   | 1of20 CYDK   | 1of20 SSEY   |
|                                                           |                                            |      |        | 1of16     | SSEY       | 2of20 TAER   | 1of20 CAEK   |              |
|                                                           |                                            |      |        | 7of20     | CVCK       | 1of20 VCDK   | 1of20 SSEK   |              |
| +5G_C1, S152C, S166K, Y192H, K202S                        | S152X, S166K, D168X, Y192X, K202X          | >1   | Target | 232 ± 43  | 0.98       | 0.39         | 0.91/0.21    |              |
|                                                           |                                            |      | +5G    | A         | 451 ± 168  | 0.96         | 0.20         | 5E-10/1E-10  |
|                                                           |                                            |      |        | C         | 362 ± 89   | ~1           | 0.25         | 0.09/0.79    |
|                                                           |                                            |      |        | T         | 569 ± 204  | 0.98         | 0.16         | 2E-3/4E-3    |
| +5G_S1, S152L                                             | S152X, D168X, Y192X, K202X                 | 0.39 | Target | 11 ± 0.5  | 0.99       | 0.55         | 0.89/0.93    |              |
|                                                           |                                            |      | +5G    | A         | 25 ± 1     | ~1           | 0.24         | 2E-16/6E-12  |
|                                                           |                                            |      |        | C         | 59 ± 6     | ~1           | 0.10         | 0.08/0.08    |
|                                                           |                                            |      |        | T         | 60 ± 6     | ~1           | 0.10         | 1E-12/6E-15  |
| +5G_S2, S152C, D168Q                                      | S152X, D168X, Y192X, K202X                 | >1   | Target | 39 ± 4    | 0.98       | 0.64         | 0.48/0.95    |              |
|                                                           |                                            |      | +5G    | A         | 150 ± 12   | 0.84         | 0.17         | 2E-16/9E-11  |
|                                                           |                                            |      |        | C         | 387 ± 54   | 0.40         | 0.06         | 0.45/0.05    |
|                                                           |                                            |      |        | T         | 182 ± 11   | 0.79         | 0.14         | 0.08/6E-3    |
| +5G_S3, S152T, D168N                                      | S152X, D168X, Y192X, K202X                 | >1   | Target | 28 ± 2    | 0.97       | 0.67         | 0.55/0.78    |              |
|                                                           |                                            |      | +5G    | A         | 157 ± 12   | 0.97         | 0.12         | 5E-19/1E-11  |
|                                                           |                                            |      |        | C         | 207 ± 37   | 0.44         | 0.09         | 0.45/0.22    |
|                                                           |                                            |      |        | T         | 151 ± 17   | 0.93         | 0.12         | 9E-5/2E-2    |
| +5G_S4, S152T, D168Q                                      | S152X, D168X, Y192X, K202X                 | >1   | Target | 35        | 0.89       | 0.77         | 0.62/0.92    |              |
|                                                           |                                            |      | +5G    | A         | 247        | 0.37         | 0.11         | 3E-16/7E-11  |
|                                                           |                                            |      |        | C         | 548        | 0.98         | 0.05         | 0.39/0.08    |
|                                                           |                                            |      |        | T         | 372        | 0.87         | 0.07         | 1E-4/1E-3    |

|                                                               |                                                                                     |        |                                                                                                                                                                                                                                                                                                                                                                                                                                                                                                                                                                                                                                                                                                                                                                                                                                                                                                                                                             |
|---------------------------------------------------------------|-------------------------------------------------------------------------------------|--------|-------------------------------------------------------------------------------------------------------------------------------------------------------------------------------------------------------------------------------------------------------------------------------------------------------------------------------------------------------------------------------------------------------------------------------------------------------------------------------------------------------------------------------------------------------------------------------------------------------------------------------------------------------------------------------------------------------------------------------------------------------------------------------------------------------------------------------------------------------------------------------------------------------------------------------------------------------------|
| Untested +5G variants, same libraries as all +5G variants     | 152, 166, 168, 192, 202                                                             |        | wt <b>S</b> <b>S</b> <b>D</b> <b>Y</b> <b>K</b> 1of12 <b>C</b> <b>K</b> <b>N</b> <b>A</b> <b>D</b> 1of12 <b>C</b> <b>K</b> <b>D</b> <b>H</b> <b>S</b> 4of11 <b>L</b> <b>S</b> <b>D</b> <b>Y</b> <b>K</b> 1of11 <b>C</b> <b>S</b> <b>Q</b> <b>Y</b> <b>K</b><br>2of12 <b>C</b> <b>K</b> <b>Q</b> <b>E</b> <b>G</b> 1of12 <b>C</b> <b>K</b> <b>D</b> <b>V</b> <b>A</b> 1of12 <b>T</b> <b>K</b> <b>D</b> <b>C</b> <b>Q</b> 2of11 <b>T</b> <b>S</b> <b>N</b> <b>Y</b> <b>K</b> 1of11 <b>A</b> <b>S</b> <b>E</b> <b>Y</b> <b>K</b><br>1of12 <b>T</b> <b>K</b> <b>D</b> <b>W</b> <b>S</b> 1of12 <b>C</b> <b>K</b> <b>D</b> <b>G</b> <b>A</b> 1of12 <b>C</b> <b>K</b> <b>D</b> <b>Q</b> <b>A</b> 2of11 <b>T</b> <b>S</b> <b>E</b> <b>Y</b> <b>K</b><br>1of12 <b>C</b> <b>K</b> <b>D</b> <b>G</b> <b>A</b> 1of12 <b>C</b> <b>K</b> <b>D</b> <b>C</b> <b>A</b> 1of12 <b>S</b> <b>K</b> <b>D</b> <b>C</b> <b>A</b> 1of11 <b>T</b> <b>S</b> <b>Q</b> <b>Y</b> <b>K</b> |
| +6C_C1, Y154W, S166G, Y192R, K202Q                            | Y154X, S166X, T189X, Y192R, K202X                                                   | >1     | Target 59 ± 4 ~1 0.76 0.88/1E-3<br>+6C A 403 ± ? 0.39 0.11 0.02/5E-3<br>G >691 - 0.07 0.11/0.99<br>T 691 ± 180 0.64 0.07 2E-6/2E-45                                                                                                                                                                                                                                                                                                                                                                                                                                                                                                                                                                                                                                                                                                                                                                                                                         |
| +6C_S1, S152C, Y154W, S166A, L234Q                            | S152X, Y154X, S166X, K202X                                                          | 0.60   | Target 303 ± 64 0.91 0.64 9E-3/1E-3<br>+6C A >1585 - 0.12 4E-3/0.02<br>G >1585 - 0.12 0.99/0.98<br>T 1585 0.43 0.12 5E-12/8E-12                                                                                                                                                                                                                                                                                                                                                                                                                                                                                                                                                                                                                                                                                                                                                                                                                             |
| Untested +6C variants, same libraries as all +6C variants     | 152, 154, 166, 192, 202                                                             |        | wt <b>S</b> <b>Y</b> <b>S</b> <b>T</b> <b>Y</b> <b>K</b> 2of17 <b>S</b> <b>Y</b> <b>A</b> <b>P</b> <b>R</b> <b>L</b> 1of17 <b>S</b> <b>W</b> <b>A</b> <b>P</b> <b>R</b> <b>K</b> 4of7 <b>C</b> <b>W</b> <b>A</b> <b>T</b> <b>Y</b> <b>K</b><br>3of17 <b>S</b> <b>W</b> <b>G</b> <b>P</b> <b>R</b> <b>L</b> 1of17 <b>S</b> <b>Y</b> <b>R</b> <b>T</b> <b>Y</b> <b>G</b> 1of17 <b>S</b> <b>Y</b> <b>A</b> <b>R</b> <b>R</b> <b>Q</b> 2of7 <b>C</b> <b>W</b> <b>S</b> <b>T</b> <b>Y</b> <b>K</b><br>3of17 <b>S</b> <b>W</b> <b>G</b> <b>A</b> <b>R</b> <b>Q</b> 1of17 <b>S</b> <b>Y</b> <b>C</b> <b>R</b> <b>R</b> <b>Q</b> 1of17 <b>S</b> <b>Y</b> <b>A</b> <b>P</b> <b>R</b> <b>A</b> 1of7 <b>S</b> <b>W</b> <b>G</b> <b>T</b> <b>Y</b> <b>K</b><br>2of17 <b>S</b> <b>W</b> <b>G</b> <b>Q</b> <b>R</b> <b>Q</b> 1of17 <b>S</b> <b>Y</b> <b>A</b> <b>P</b> <b>R</b> <b>Q</b> 1of17 <b>S</b> <b>W</b> <b>A</b> <b>P</b> <b>R</b> <b>Q</b>                      |
| +6T_S1, S152A, Y154A, S166I, T189P, K202H                     | S152X, Y154X, S166X, T189X, K202X                                                   | <0.001 | Target 437 ± 247 ~1 0.43 0.25/0.23<br>+6T A 989 ± 944 0.47 0.19 0.10/0.02<br>C >989 - 0.19 0.27/0.68<br>G 968 ± 751 0.62 0.19 0.38/0.07                                                                                                                                                                                                                                                                                                                                                                                                                                                                                                                                                                                                                                                                                                                                                                                                                     |
| +7A_P1, mutations + extended loop 153-164                     | NA                                                                                  | NA     | Target 8 ± 2 1 0.47 2E-5/0.10<br>+7A C 74 ± 4 0.97 0.05 0.35/0.52<br>G 328 ± 23 ~1 0.01 0.08/0.05<br>T 8 ± 1 0.98 0.47 0.57/0.33                                                                                                                                                                                                                                                                                                                                                                                                                                                                                                                                                                                                                                                                                                                                                                                                                            |
| +7A_P2, mutations + shorter loop 155-163                      | NA                                                                                  | NA     | Target 20 ± 7 0.93 0.76 2E-5/0.10<br>+7A C 588 ± 151 ~1 0.03 0.31/0.58<br>G 459 ± 190 0.75 0.03 0.07/0.07<br>T 86 ± 30 0.94 0.18 0.62/0.24                                                                                                                                                                                                                                                                                                                                                                                                                                                                                                                                                                                                                                                                                                                                                                                                                  |
| +7C_S1, T189V, T204R                                          | Y154X, L156X, T189X, T204X                                                          | 0.30   | Target 242 ± 57 ~1 0.75 0.31/0.75<br>+7C A 2111 ± ? 0.47 0.09 4E-5/0.14<br>G >2111 - 0.09 0.06/0.09<br>T >2111 - 0.09 0.63/0.02                                                                                                                                                                                                                                                                                                                                                                                                                                                                                                                                                                                                                                                                                                                                                                                                                             |
| Untested +7C variants, same library as +7C_S1                 | 189, 204                                                                            |        | wt <b>T</b> <b>T</b><br>4of11 <b>P</b> <b>R</b><br>4of11 <b>V</b> <b>R</b><br>3of11 <b>T</b> <b>R</b>                                                                                                                                                                                                                                                                                                                                                                                                                                                                                                                                                                                                                                                                                                                                                                                                                                                       |
| Untested +7G variants, several motif-based libraries          | 154X/R, 156X, 157X/wt, 166X/wt, 164X/R, 202X/wt, 204X                               | 0.51   | 154, 156, 157, 164, 166, 202, 204 wt <b>Y</b> <b>L</b> <b>N</b> <b>I</b> <b>S</b> <b>K</b> <b>T</b> 1of6 <b>Y</b> <b>R</b> <b>R</b> <b>R</b> <b>S</b> <b>K</b> <b>E</b> 1of8 <b>R</b> <b>V</b> <b>N</b> <b>R</b> <b>S</b> <b>Q</b> <b>T</b><br>2of6 <b>R</b> <b>K</b> <b>A</b> <b>I</b> <b>S</b> <b>K</b> <b>A</b> 1of6 <b>Y</b> <b>R</b> <b>R</b> <b>I</b> <b>S</b> <b>K</b> <b>E</b> 1of8 <b>R</b> <b>L</b> <b>N</b> <b>R</b> <b>S</b> <b>Q</b> <b>A</b><br>1of6 <b>Y</b> <b>W</b> <b>R</b> <b>R</b> <b>S</b> <b>K</b> <b>E</b> 7of7 <b>R</b> <b>L</b> <b>N</b> <b>R</b> <b>S</b> <b>Q</b> <b>A</b> 1of8 <b>S</b> <b>V</b> <b>N</b> <b>R</b> <b>R</b> <b>Q</b> <b>G</b><br>1of6 <b>R</b> <b>K</b> <b>T</b> <b>I</b> <b>S</b> <b>K</b> <b>A</b> 5of8 <b>C</b> <b>V</b> <b>N</b> <b>R</b> <b>R</b> <b>E</b> <b>G</b>                                                                                                                                        |
| Untested +8A variants                                         | L156X, N157X, I164X, T189X, T204X                                                   | 0.53   | 156, 157, 164, 189, 204 wt <b>L</b> <b>N</b> <b>I</b> <b>T</b> <b>T</b> 1of16 <b>C</b> <b>R</b> <b>I</b> <b>T</b> <b>C</b> 1of16 <b>L</b> <b>A</b> <b>T</b> <b>P</b> <b>N</b> 1of16 <b>V</b> <b>A</b> <b>L</b> <b>A</b> <b>A</b><br>4of16 <b>O</b> <b>P</b> <b>S</b> <b>T</b> <b>S</b> 1of16 <b>V</b> <b>R</b> <b>L</b> <b>T</b> <b>Q</b> 1of16 <b>L</b> <b>A</b> <b>A</b> <b>T</b> <b>C</b> 1of16 <b>G</b> <b>A</b> <b>A</b> <b>T</b> <b>T</b><br>1of16 <b>H</b> <b>A</b> <b>A</b> <b>T</b> <b>S</b> 1of16 <b>P</b> <b>V</b> <b>A</b> <b>T</b> <b>A</b> 1of16 <b>S</b> <b>A</b> <b>T</b> <b>G</b> <b>A</b><br>1of16 <b>O</b> <b>P</b> <b>S</b> <b>T</b> <b>S</b> 1of16 <b>P</b> <b>G</b> <b>T</b> <b>T</b> <b>N</b> 1of16 <b>G</b> <b>A</b> <b>V</b> <b>T</b> <b>V</b>                                                                                                                                                                                     |
| +8C_P1, L156Q, I164R, T204S                                   | NA, EC <sub>1/2max</sub> collected for +8C only = 2.9 nM, Thyme <i>et al</i> , 2009 | NA     | Target 1.2E-1 ± 4E-3 NA 0.78 0.92/0.87<br>+8C A 7E-3 ± 1E-3 NA 0.05 1E-4/5E-3<br>G 1.8E-2 ± 9E-3 NA 0.12 0.01/0.04<br>T 9E-3 ± 7E-4 NA 0.06 0.07/0.09                                                                                                                                                                                                                                                                                                                                                                                                                                                                                                                                                                                                                                                                                                                                                                                                       |
| Untested +8C variants, used as a control for selection method | L156X, I164X, T204X                                                                 | 0.31   | 156, 164, 204 wt <b>L</b> <b>I</b> <b>T</b> 3of27 <b>P</b> <b>S</b> <b>A</b> 1of27 <b>P</b> <b>C</b> <b>H</b> 1of27 <b>S</b> <b>A</b> <b>C</b><br>5of27 <b>C</b> <b>R</b> <b>S</b> 2of27 <b>T</b> <b>R</b> <b>S</b> 1of27 <b>H</b> <b>A</b> <b>G</b> 1of27 <b>N</b> <b>V</b> <b>S</b><br>4of27 <b>P</b> <b>A</b> <b>G</b> 2of27 <b>V</b> <b>S</b> <b>N</b> 1of27 <b>N</b> <b>A</b> <b>N</b><br>4of27 <b>Q</b> <b>R</b> <b>S</b> 1of27 <b>H</b> <b>C</b> <b>H</b> 1of27 <b>N</b> <b>V</b> <b>L</b>                                                                                                                                                                                                                                                                                                                                                                                                                                                           |
| Untested +8C variants                                         | L156X, N157X, I164X, T189X, T204X                                                   | 0.75   | 156, 157, 164, 189, 204 wt <b>L</b> <b>N</b> <b>I</b> <b>T</b> <b>T</b> 1of15 <b>V</b> <b>G</b> <b>S</b> <b>T</b> <b>H</b> 1of15 <b>S</b> <b>V</b> <b>H</b> <b>G</b> <b>S</b> 1of15 <b>A</b> <b>R</b> <b>G</b> <b>T</b> <b>T</b><br>3of15 <b>S</b> <b>G</b> <b>A</b> <b>T</b> <b>C</b> 1of15 <b>V</b> <b>C</b> <b>A</b> <b>T</b> <b>N</b> 1of15 <b>P</b> <b>R</b> <b>N</b> <b>T</b> <b>H</b> 1of15 <b>W</b> <b>G</b> <b>S</b> <b>S</b> <b>S</b><br>1of15 <b>A</b> <b>V</b> <b>R</b> <b>T</b> <b>D</b> 1of15 <b>S</b> <b>L</b> <b>S</b> <b>T</b> <b>H</b> 1of15 <b>P</b> <b>I</b> <b>R</b> <b>T</b> <b>G</b><br>1of15 <b>P</b> <b>A</b> <b>A</b> <b>V</b> <b>G</b> 1of15 <b>E</b> <b>S</b> <b>S</b> <b>S</b> <b>A</b> 1of15 <b>S</b> <b>S</b> <b>A</b> <b>S</b> <b>V</b>                                                                                                                                                                                     |
| Untested +8G variants                                         | L156X, N157X, I164X, T189X, T204X                                                   | 0.69   | 156, 157, 164, 189, 204 wt <b>L</b> <b>N</b> <b>I</b> <b>T</b> <b>T</b> 1of7 <b>G</b> <b>N</b> <b>S</b> <b>P</b> <b>C</b><br>1of7 <b>H</b> <b>C</b> <b>A</b> <b>P</b> <b>D</b> 1of7 <b>L</b> <b>R</b> <b>H</b> <b>T</b> <b>E</b><br>1of7 <b>L</b> <b>Q</b> <b>T</b> <b>T</b> <b>E</b> 1of7 <b>S</b> <b>R</b> <b>C</b> <b>R</b> <b>D</b><br>1of7 <b>W</b> <b>R</b> <b>R</b> <b>T</b> <b>E</b> 1of7 <b>R</b> <b>A</b> <b>A</b> <b>T</b> <b>Q</b>                                                                                                                                                                                                                                                                                                                                                                                                                                                                                                              |



**Table S2.** Data and notes on all the multiple base-pair I-Anil variants described in this paper. The related graphs of cleavage data is in Figure S8. The data includes  $k_{cat}/K_M$ , % cleavage, and  $EC_{1/2max}$ . Sequences of variants that were not selected are also included, as well as starting libraries and corresponding survivals.

| Selected Variant Name and Tested Sequence                                                                                                                                                                                                                                            | Starting Library Examples, X = all 20 AAs (either <i>NNN</i> or <i>NNS</i> ), and other codons use the accepted code for degenerate base-pairs to define the amino acids included in the library. Example results from these different libraries are shown.                                                                                                                                                                                  | Library Survival (0 - 1), round 2 or round 3                    | Target Site | $EC_{1/2max}$ (nM), % cleavage, or $k_{cat}/K_M$ for some enzymes | Cleavage Plateau ( $f_{max}$ ), NA for % cleavage or $k_{cat}/K_M$ |      |
|--------------------------------------------------------------------------------------------------------------------------------------------------------------------------------------------------------------------------------------------------------------------------------------|----------------------------------------------------------------------------------------------------------------------------------------------------------------------------------------------------------------------------------------------------------------------------------------------------------------------------------------------------------------------------------------------------------------------------------------------|-----------------------------------------------------------------|-------------|-------------------------------------------------------------------|--------------------------------------------------------------------|------|
| CPK2_N<br>Y18C, T22S, G33K, S57T, R59T, A68H, R70E, enzyme expressed extremely poorly, so values in columns for activity data are percent cleavage with two concentrations, the highest possible and then 1/4 of that - corresponding to approximately 1,700 nM for the lower value. | 1) Y18C, S20X, T22S, E31R, G33MAG, R59T, M66X, A68X, R70E<br>2) Y18C, T22S, E31R, G33MAG, S57X, R59X, A68X, R70E<br>3) Y18C, T22S, E31R, G33K, S57WCC, R59ASS, M66T, A68SWC, R70E<br><br>left: 18, 20, 22, 31, 33, 57, 59, 66, 68, 70 from libraries 1 and 2 mixed<br>right: 18, 22, 31, 33, 57, 59, 66, 68, 70 from library 3<br><br>                                                                                                       | 0.11 for R2 of libraries 1 and 2 mixed                          | Target      | 0.79, 0.36                                                        | NA                                                                 |      |
|                                                                                                                                                                                                                                                                                      |                                                                                                                                                                                                                                                                                                                                                                                                                                              |                                                                 | -6C         | A                                                                 | 0, 0                                                               | NA   |
|                                                                                                                                                                                                                                                                                      |                                                                                                                                                                                                                                                                                                                                                                                                                                              |                                                                 |             | G                                                                 | 0, 0                                                               | NA   |
|                                                                                                                                                                                                                                                                                      |                                                                                                                                                                                                                                                                                                                                                                                                                                              |                                                                 |             | T                                                                 | 0, 0                                                               | NA   |
|                                                                                                                                                                                                                                                                                      |                                                                                                                                                                                                                                                                                                                                                                                                                                              |                                                                 | Target      |                                                                   | 0.79, 0.36                                                         | NA   |
|                                                                                                                                                                                                                                                                                      |                                                                                                                                                                                                                                                                                                                                                                                                                                              |                                                                 | -5A         | C                                                                 | 0, 0                                                               | NA   |
|                                                                                                                                                                                                                                                                                      |                                                                                                                                                                                                                                                                                                                                                                                                                                              |                                                                 |             | G                                                                 | 0.15, 0                                                            | NA   |
|                                                                                                                                                                                                                                                                                      |                                                                                                                                                                                                                                                                                                                                                                                                                                              |                                                                 |             | T                                                                 | NA                                                                 | NA   |
|                                                                                                                                                                                                                                                                                      |                                                                                                                                                                                                                                                                                                                                                                                                                                              |                                                                 | Target      |                                                                   | 0.79, 0.36                                                         | NA   |
|                                                                                                                                                                                                                                                                                      |                                                                                                                                                                                                                                                                                                                                                                                                                                              |                                                                 | -4T         | A                                                                 | 0.66, 0                                                            | NA   |
|                                                                                                                                                                                                                                                                                      |                                                                                                                                                                                                                                                                                                                                                                                                                                              |                                                                 |             | C                                                                 | 0.82, 0.42                                                         | NA   |
|                                                                                                                                                                                                                                                                                      |                                                                                                                                                                                                                                                                                                                                                                                                                                              |                                                                 |             | G                                                                 | 0.77, 0                                                            | NA   |
|                                                                                                                                                                                                                                                                                      |                                                                                                                                                                                                                                                                                                                                                                                                                                              |                                                                 | Target      |                                                                   | 0.79, 0.36                                                         | NA   |
|                                                                                                                                                                                                                                                                                      |                                                                                                                                                                                                                                                                                                                                                                                                                                              |                                                                 | -2G         | A                                                                 | 0.74, 0.30                                                         | NA   |
|                                                                                                                                                                                                                                                                                      |                                                                                                                                                                                                                                                                                                                                                                                                                                              |                                                                 |             | C                                                                 | 0.28, 0                                                            | NA   |
|                                                                                                                                                                                                                                                                                      | T                                                                                                                                                                                                                                                                                                                                                                                                                                            | 0.78, 0.23                                                      | NA          |                                                                   |                                                                    |      |
| Target                                                                                                                                                                                                                                                                               |                                                                                                                                                                                                                                                                                                                                                                                                                                              | 0.79, 0.36                                                      | NA          |                                                                   |                                                                    |      |
| +1A                                                                                                                                                                                                                                                                                  | C                                                                                                                                                                                                                                                                                                                                                                                                                                            | 0.65, 0                                                         | NA          |                                                                   |                                                                    |      |
|                                                                                                                                                                                                                                                                                      | G                                                                                                                                                                                                                                                                                                                                                                                                                                            | 0.76, 0.17                                                      | NA          |                                                                   |                                                                    |      |
|                                                                                                                                                                                                                                                                                      | T                                                                                                                                                                                                                                                                                                                                                                                                                                            | 0.72, 0.23                                                      | NA          |                                                                   |                                                                    |      |
| CPK2_Cgg, +4G and +5G pocket, untested                                                                                                                                                                                                                                               | 1) S152WBS, S166ARS, D168VVS, 192X, K200X, K202X<br>2) S152C, S166K, D168GSC, 192X, 194X, K200X, K202BMJ<br>3) S152WBS, S166X, D168K, 192X, K200H, K202X<br><br>152, 166, 168, 192, 200, 202                                                                                                                                                                                                                                                 | 0.29 for R2 of all three libraries mixed                        | NA          |                                                                   |                                                                    |      |
| CPK2_C1, S152C, K155R, L156K, Y162H, I164V, S166K, D168A, T189S, Y192G, K200R, K202D                                                                                                                                                                                                 | The following three libraries are some of the first based on the Cgg pocket library results and expanding to try and target the full C half-<br>1) S152C, L156X, I164X, S166K, D168A, Y192GDG, K200R, K202BWS, T204X<br>2) S152C, I164X, S166K, D168A, T189X, Y192GDG, K200R, K202BWS, T204X<br>3) S152C, K155X, L156X, I164X, S166K, D168A, Y192GDG, K200R, K202BWS, T204X<br>152, 155, 156, 164, 166, 168, 189, 192, 200, 202, 204<br><br> | Survivals for these initial libraries (1-5) was lower than 0.01 | Target      | 44                                                                | 0.54                                                               |      |
|                                                                                                                                                                                                                                                                                      |                                                                                                                                                                                                                                                                                                                                                                                                                                              |                                                                 | +1A         | C                                                                 | 31                                                                 | 0.49 |
|                                                                                                                                                                                                                                                                                      |                                                                                                                                                                                                                                                                                                                                                                                                                                              |                                                                 |             | G                                                                 | NA                                                                 | NA   |
|                                                                                                                                                                                                                                                                                      |                                                                                                                                                                                                                                                                                                                                                                                                                                              |                                                                 |             | T                                                                 | 135                                                                | 0.20 |
|                                                                                                                                                                                                                                                                                      |                                                                                                                                                                                                                                                                                                                                                                                                                                              |                                                                 | Target      |                                                                   | 44                                                                 | 0.54 |
|                                                                                                                                                                                                                                                                                      |                                                                                                                                                                                                                                                                                                                                                                                                                                              |                                                                 | +4G         | A                                                                 | >750                                                               | NA   |
|                                                                                                                                                                                                                                                                                      |                                                                                                                                                                                                                                                                                                                                                                                                                                              |                                                                 |             | C                                                                 | >750                                                               | NA   |
|                                                                                                                                                                                                                                                                                      |                                                                                                                                                                                                                                                                                                                                                                                                                                              |                                                                 |             | T                                                                 | 50                                                                 | 0.61 |
|                                                                                                                                                                                                                                                                                      |                                                                                                                                                                                                                                                                                                                                                                                                                                              |                                                                 | Target      |                                                                   | 44                                                                 | 0.54 |
|                                                                                                                                                                                                                                                                                      |                                                                                                                                                                                                                                                                                                                                                                                                                                              |                                                                 | +5G         | A                                                                 | >750                                                               | NA   |
|                                                                                                                                                                                                                                                                                      |                                                                                                                                                                                                                                                                                                                                                                                                                                              |                                                                 |             | C                                                                 | >750                                                               | NA   |
|                                                                                                                                                                                                                                                                                      |                                                                                                                                                                                                                                                                                                                                                                                                                                              |                                                                 |             | T                                                                 | >750                                                               | NA   |
|                                                                                                                                                                                                                                                                                      |                                                                                                                                                                                                                                                                                                                                                                                                                                              |                                                                 | Target      |                                                                   | 44                                                                 | 0.54 |
|                                                                                                                                                                                                                                                                                      |                                                                                                                                                                                                                                                                                                                                                                                                                                              |                                                                 | +7G         | A                                                                 | 32                                                                 | 0.73 |
|                                                                                                                                                                                                                                                                                      |                                                                                                                                                                                                                                                                                                                                                                                                                                              |                                                                 |             | C                                                                 | 15                                                                 | 0.86 |
|                                                                                                                                                                                                                                                                                      | T                                                                                                                                                                                                                                                                                                                                                                                                                                            | 10                                                              | 0.83        |                                                                   |                                                                    |      |
| Target                                                                                                                                                                                                                                                                               |                                                                                                                                                                                                                                                                                                                                                                                                                                              | 44                                                              | 0.54        |                                                                   |                                                                    |      |
| +9C                                                                                                                                                                                                                                                                                  | A                                                                                                                                                                                                                                                                                                                                                                                                                                            | 62                                                              | 0.45        |                                                                   |                                                                    |      |
|                                                                                                                                                                                                                                                                                      | G                                                                                                                                                                                                                                                                                                                                                                                                                                            | 32                                                              | 0.75        |                                                                   |                                                                    |      |
|                                                                                                                                                                                                                                                                                      | T                                                                                                                                                                                                                                                                                                                                                                                                                                            | 49                                                              | 0.56        |                                                                   |                                                                    |      |
| Target                                                                                                                                                                                                                                                                               |                                                                                                                                                                                                                                                                                                                                                                                                                                              | 44                                                              | 0.54        |                                                                   |                                                                    |      |
| +10C                                                                                                                                                                                                                                                                                 | A                                                                                                                                                                                                                                                                                                                                                                                                                                            | NA                                                              | NA          |                                                                   |                                                                    |      |
|                                                                                                                                                                                                                                                                                      | G                                                                                                                                                                                                                                                                                                                                                                                                                                            | 511                                                             | 0.42        |                                                                   |                                                                    |      |
|                                                                                                                                                                                                                                                                                      | T                                                                                                                                                                                                                                                                                                                                                                                                                                            | 207                                                             | 0.45        |                                                                   |                                                                    |      |
|                                                                                                                                                                                                                                                                                      |                                                                                                                                                                                                                                                                                                                                                                                                                                              |                                                                 |             |                                                                   |                                                                    |      |

|                                                                                                                                                                                                                                                                                                                                                                               |                                                                                                                                                                                                                                                                                                                                                                                                                                                                                                                                                                                                                                                                                                                                                                                                                                                                                                                                                                                                                                                                                                                              |                                                                                                                                                                                                                                                                                                                                                                                                                                                                                                                                                                                                                                                                                                                                                                                                                                                                                                                                                                                                                                                                                                                                                                                                                                                                                                                                                                                                                                                                  |        |  |     |      |     |   |    |      |  |   |    |      |  |   |    |      |        |  |     |      |     |   |      |      |  |   |      |      |  |   |      |      |        |  |     |      |     |   |      |      |  |   |      |      |  |   |      |      |        |  |     |      |     |   |    |      |  |   |     |      |  |   |     |      |        |  |    |      |     |   |    |      |  |   |    |      |  |   |    |      |        |  |   |      |      |   |    |    |  |   |    |      |  |   |    |      |
|-------------------------------------------------------------------------------------------------------------------------------------------------------------------------------------------------------------------------------------------------------------------------------------------------------------------------------------------------------------------------------|------------------------------------------------------------------------------------------------------------------------------------------------------------------------------------------------------------------------------------------------------------------------------------------------------------------------------------------------------------------------------------------------------------------------------------------------------------------------------------------------------------------------------------------------------------------------------------------------------------------------------------------------------------------------------------------------------------------------------------------------------------------------------------------------------------------------------------------------------------------------------------------------------------------------------------------------------------------------------------------------------------------------------------------------------------------------------------------------------------------------------|------------------------------------------------------------------------------------------------------------------------------------------------------------------------------------------------------------------------------------------------------------------------------------------------------------------------------------------------------------------------------------------------------------------------------------------------------------------------------------------------------------------------------------------------------------------------------------------------------------------------------------------------------------------------------------------------------------------------------------------------------------------------------------------------------------------------------------------------------------------------------------------------------------------------------------------------------------------------------------------------------------------------------------------------------------------------------------------------------------------------------------------------------------------------------------------------------------------------------------------------------------------------------------------------------------------------------------------------------------------------------------------------------------------------------------------------------------------|--------|--|-----|------|-----|---|----|------|--|---|----|------|--|---|----|------|--------|--|-----|------|-----|---|------|------|--|---|------|------|--|---|------|------|--------|--|-----|------|-----|---|------|------|--|---|------|------|--|---|------|------|--------|--|-----|------|-----|---|----|------|--|---|-----|------|--|---|-----|------|--------|--|----|------|-----|---|----|------|--|---|----|------|--|---|----|------|--------|--|---|------|------|---|----|----|--|---|----|------|--|---|----|------|
| <p>CPK2_C2, S152C, K155R, L156K, Y162H, I164V, S166K, D168A, T189S, Y192G, K200R, K202E, T204X</p> <p>7) S152C, K155R, L156K, Y162H, I164V, S166X, D168X, T189S, Y192G, K200R, K202X, T204A</p> <p>8) S152X, K155R, L156K, Y162H, I164V, S166K, D168A, T189S, Y192G, K200R, K202X, T204X</p> <p>Library 6 results, Library 7 results, Library 8 results (positions above)</p> | <p>Library 6</p> <pre> 10of16 CRKHVKS SGRDA 2of8 CRDHPKAS GREES 2of8 CRSHRKAS GREK 1of8 CRDHPKAS GRET 1of8 CRAHVKAS GRET 1of8 CRVHNKAS GREG 1of8 CRNHKAS GREED </pre> <p>Library 7</p> <pre> 10of16 CRKHVKS SGRDA 4of16 CRKHVKS SGRDA 1of16 CRKHVKS SGRDA 1of16 CRKHVKMS GRDA </pre> <p>Library 8</p> <pre> 12of14 CRKHVKS GRDA 1of14 CRKHVKS GRDV 1of14 CRKHVKS GRDT </pre> <p>Libraries 6-8 showed the extreme importance of K202D, D168S, and T204A for high survival</p> <p>9) S152C, K155R, L156K, N157X, D158X, D160X, D161X, Y162H, I164V, S166K, D168S, T189S, Y192G, K200R, K202D, T204A</p> <p>10) S152C, K155R, L156K, Y162H, I164V, S166K, D168S, A170X, T189S, Y192G, D194X, T196X, C198X, K200R, K202D, T204A</p> <p>11) S152C, K155R, L156K, Y162H, I164V, S166K, D168S, T189S, Y192X, D194X, K200X, K202D, T204A</p> <p>Library 9 results, Library 10 results, Library 11 result (positions above)</p>                                                                                                                                                                                                       | <p>Library 6 had survival of 0.03, library 7 had a survival of 0.47, and library 8 had a survival of 0.36</p> <table border="1"> <tr><td>Target</td><td></td><td>14</td><td>0.91</td></tr> <tr><td>+1A</td><td>C</td><td>13</td><td>0.88</td></tr> <tr><td></td><td>G</td><td>NA</td><td>NA</td></tr> <tr><td></td><td>T</td><td>18</td><td>0.84</td></tr> <tr><td>Target</td><td></td><td>14</td><td>0.91</td></tr> <tr><td>+4G</td><td>A</td><td>45</td><td>0.65</td></tr> <tr><td></td><td>C</td><td>124</td><td>0.20</td></tr> <tr><td></td><td>T</td><td>14</td><td>0.94</td></tr> <tr><td>Target</td><td></td><td>14</td><td>0.91</td></tr> <tr><td>+5G</td><td>A</td><td>31</td><td>0.78</td></tr> <tr><td></td><td>C</td><td>120</td><td>0.43</td></tr> <tr><td></td><td>T</td><td>227</td><td>0.88</td></tr> <tr><td>Target</td><td></td><td>14</td><td>0.91</td></tr> <tr><td>+7G</td><td>A</td><td>13</td><td>0.89</td></tr> <tr><td></td><td>C</td><td>12</td><td>0.90</td></tr> <tr><td></td><td>T</td><td>10</td><td>0.88</td></tr> <tr><td>Target</td><td></td><td>14</td><td>0.91</td></tr> <tr><td>+9C</td><td>A</td><td>21</td><td>0.86</td></tr> <tr><td></td><td>G</td><td>49</td><td>0.82</td></tr> <tr><td></td><td>T</td><td>20</td><td>0.84</td></tr> </table>                                                                                                                                                                           | Target |  | 14  | 0.91 | +1A | C | 13 | 0.88 |  | G | NA | NA   |  | T | 18 | 0.84 | Target |  | 14  | 0.91 | +4G | A | 45   | 0.65 |  | C | 124  | 0.20 |  | T | 14   | 0.94 | Target |  | 14  | 0.91 | +5G | A | 31   | 0.78 |  | C | 120  | 0.43 |  | T | 227  | 0.88 | Target |  | 14  | 0.91 | +7G | A | 13 | 0.89 |  | C | 12  | 0.90 |  | T | 10  | 0.88 | Target |  | 14 | 0.91 | +9C | A | 21 | 0.86 |  | G | 49 | 0.82 |  | T | 20 | 0.84 |        |  |   |      |      |   |    |    |  |   |    |      |  |   |    |      |
| Target                                                                                                                                                                                                                                                                                                                                                                        |                                                                                                                                                                                                                                                                                                                                                                                                                                                                                                                                                                                                                                                                                                                                                                                                                                                                                                                                                                                                                                                                                                                              | 14                                                                                                                                                                                                                                                                                                                                                                                                                                                                                                                                                                                                                                                                                                                                                                                                                                                                                                                                                                                                                                                                                                                                                                                                                                                                                                                                                                                                                                                               | 0.91   |  |     |      |     |   |    |      |  |   |    |      |  |   |    |      |        |  |     |      |     |   |      |      |  |   |      |      |  |   |      |      |        |  |     |      |     |   |      |      |  |   |      |      |  |   |      |      |        |  |     |      |     |   |    |      |  |   |     |      |  |   |     |      |        |  |    |      |     |   |    |      |  |   |    |      |  |   |    |      |        |  |   |      |      |   |    |    |  |   |    |      |  |   |    |      |
| +1A                                                                                                                                                                                                                                                                                                                                                                           | C                                                                                                                                                                                                                                                                                                                                                                                                                                                                                                                                                                                                                                                                                                                                                                                                                                                                                                                                                                                                                                                                                                                            | 13                                                                                                                                                                                                                                                                                                                                                                                                                                                                                                                                                                                                                                                                                                                                                                                                                                                                                                                                                                                                                                                                                                                                                                                                                                                                                                                                                                                                                                                               | 0.88   |  |     |      |     |   |    |      |  |   |    |      |  |   |    |      |        |  |     |      |     |   |      |      |  |   |      |      |  |   |      |      |        |  |     |      |     |   |      |      |  |   |      |      |  |   |      |      |        |  |     |      |     |   |    |      |  |   |     |      |  |   |     |      |        |  |    |      |     |   |    |      |  |   |    |      |  |   |    |      |        |  |   |      |      |   |    |    |  |   |    |      |  |   |    |      |
|                                                                                                                                                                                                                                                                                                                                                                               | G                                                                                                                                                                                                                                                                                                                                                                                                                                                                                                                                                                                                                                                                                                                                                                                                                                                                                                                                                                                                                                                                                                                            | NA                                                                                                                                                                                                                                                                                                                                                                                                                                                                                                                                                                                                                                                                                                                                                                                                                                                                                                                                                                                                                                                                                                                                                                                                                                                                                                                                                                                                                                                               | NA     |  |     |      |     |   |    |      |  |   |    |      |  |   |    |      |        |  |     |      |     |   |      |      |  |   |      |      |  |   |      |      |        |  |     |      |     |   |      |      |  |   |      |      |  |   |      |      |        |  |     |      |     |   |    |      |  |   |     |      |  |   |     |      |        |  |    |      |     |   |    |      |  |   |    |      |  |   |    |      |        |  |   |      |      |   |    |    |  |   |    |      |  |   |    |      |
|                                                                                                                                                                                                                                                                                                                                                                               | T                                                                                                                                                                                                                                                                                                                                                                                                                                                                                                                                                                                                                                                                                                                                                                                                                                                                                                                                                                                                                                                                                                                            | 18                                                                                                                                                                                                                                                                                                                                                                                                                                                                                                                                                                                                                                                                                                                                                                                                                                                                                                                                                                                                                                                                                                                                                                                                                                                                                                                                                                                                                                                               | 0.84   |  |     |      |     |   |    |      |  |   |    |      |  |   |    |      |        |  |     |      |     |   |      |      |  |   |      |      |  |   |      |      |        |  |     |      |     |   |      |      |  |   |      |      |  |   |      |      |        |  |     |      |     |   |    |      |  |   |     |      |  |   |     |      |        |  |    |      |     |   |    |      |  |   |    |      |  |   |    |      |        |  |   |      |      |   |    |    |  |   |    |      |  |   |    |      |
| Target                                                                                                                                                                                                                                                                                                                                                                        |                                                                                                                                                                                                                                                                                                                                                                                                                                                                                                                                                                                                                                                                                                                                                                                                                                                                                                                                                                                                                                                                                                                              | 14                                                                                                                                                                                                                                                                                                                                                                                                                                                                                                                                                                                                                                                                                                                                                                                                                                                                                                                                                                                                                                                                                                                                                                                                                                                                                                                                                                                                                                                               | 0.91   |  |     |      |     |   |    |      |  |   |    |      |  |   |    |      |        |  |     |      |     |   |      |      |  |   |      |      |  |   |      |      |        |  |     |      |     |   |      |      |  |   |      |      |  |   |      |      |        |  |     |      |     |   |    |      |  |   |     |      |  |   |     |      |        |  |    |      |     |   |    |      |  |   |    |      |  |   |    |      |        |  |   |      |      |   |    |    |  |   |    |      |  |   |    |      |
| +4G                                                                                                                                                                                                                                                                                                                                                                           | A                                                                                                                                                                                                                                                                                                                                                                                                                                                                                                                                                                                                                                                                                                                                                                                                                                                                                                                                                                                                                                                                                                                            | 45                                                                                                                                                                                                                                                                                                                                                                                                                                                                                                                                                                                                                                                                                                                                                                                                                                                                                                                                                                                                                                                                                                                                                                                                                                                                                                                                                                                                                                                               | 0.65   |  |     |      |     |   |    |      |  |   |    |      |  |   |    |      |        |  |     |      |     |   |      |      |  |   |      |      |  |   |      |      |        |  |     |      |     |   |      |      |  |   |      |      |  |   |      |      |        |  |     |      |     |   |    |      |  |   |     |      |  |   |     |      |        |  |    |      |     |   |    |      |  |   |    |      |  |   |    |      |        |  |   |      |      |   |    |    |  |   |    |      |  |   |    |      |
|                                                                                                                                                                                                                                                                                                                                                                               | C                                                                                                                                                                                                                                                                                                                                                                                                                                                                                                                                                                                                                                                                                                                                                                                                                                                                                                                                                                                                                                                                                                                            | 124                                                                                                                                                                                                                                                                                                                                                                                                                                                                                                                                                                                                                                                                                                                                                                                                                                                                                                                                                                                                                                                                                                                                                                                                                                                                                                                                                                                                                                                              | 0.20   |  |     |      |     |   |    |      |  |   |    |      |  |   |    |      |        |  |     |      |     |   |      |      |  |   |      |      |  |   |      |      |        |  |     |      |     |   |      |      |  |   |      |      |  |   |      |      |        |  |     |      |     |   |    |      |  |   |     |      |  |   |     |      |        |  |    |      |     |   |    |      |  |   |    |      |  |   |    |      |        |  |   |      |      |   |    |    |  |   |    |      |  |   |    |      |
|                                                                                                                                                                                                                                                                                                                                                                               | T                                                                                                                                                                                                                                                                                                                                                                                                                                                                                                                                                                                                                                                                                                                                                                                                                                                                                                                                                                                                                                                                                                                            | 14                                                                                                                                                                                                                                                                                                                                                                                                                                                                                                                                                                                                                                                                                                                                                                                                                                                                                                                                                                                                                                                                                                                                                                                                                                                                                                                                                                                                                                                               | 0.94   |  |     |      |     |   |    |      |  |   |    |      |  |   |    |      |        |  |     |      |     |   |      |      |  |   |      |      |  |   |      |      |        |  |     |      |     |   |      |      |  |   |      |      |  |   |      |      |        |  |     |      |     |   |    |      |  |   |     |      |  |   |     |      |        |  |    |      |     |   |    |      |  |   |    |      |  |   |    |      |        |  |   |      |      |   |    |    |  |   |    |      |  |   |    |      |
| Target                                                                                                                                                                                                                                                                                                                                                                        |                                                                                                                                                                                                                                                                                                                                                                                                                                                                                                                                                                                                                                                                                                                                                                                                                                                                                                                                                                                                                                                                                                                              | 14                                                                                                                                                                                                                                                                                                                                                                                                                                                                                                                                                                                                                                                                                                                                                                                                                                                                                                                                                                                                                                                                                                                                                                                                                                                                                                                                                                                                                                                               | 0.91   |  |     |      |     |   |    |      |  |   |    |      |  |   |    |      |        |  |     |      |     |   |      |      |  |   |      |      |  |   |      |      |        |  |     |      |     |   |      |      |  |   |      |      |  |   |      |      |        |  |     |      |     |   |    |      |  |   |     |      |  |   |     |      |        |  |    |      |     |   |    |      |  |   |    |      |  |   |    |      |        |  |   |      |      |   |    |    |  |   |    |      |  |   |    |      |
| +5G                                                                                                                                                                                                                                                                                                                                                                           | A                                                                                                                                                                                                                                                                                                                                                                                                                                                                                                                                                                                                                                                                                                                                                                                                                                                                                                                                                                                                                                                                                                                            | 31                                                                                                                                                                                                                                                                                                                                                                                                                                                                                                                                                                                                                                                                                                                                                                                                                                                                                                                                                                                                                                                                                                                                                                                                                                                                                                                                                                                                                                                               | 0.78   |  |     |      |     |   |    |      |  |   |    |      |  |   |    |      |        |  |     |      |     |   |      |      |  |   |      |      |  |   |      |      |        |  |     |      |     |   |      |      |  |   |      |      |  |   |      |      |        |  |     |      |     |   |    |      |  |   |     |      |  |   |     |      |        |  |    |      |     |   |    |      |  |   |    |      |  |   |    |      |        |  |   |      |      |   |    |    |  |   |    |      |  |   |    |      |
|                                                                                                                                                                                                                                                                                                                                                                               | C                                                                                                                                                                                                                                                                                                                                                                                                                                                                                                                                                                                                                                                                                                                                                                                                                                                                                                                                                                                                                                                                                                                            | 120                                                                                                                                                                                                                                                                                                                                                                                                                                                                                                                                                                                                                                                                                                                                                                                                                                                                                                                                                                                                                                                                                                                                                                                                                                                                                                                                                                                                                                                              | 0.43   |  |     |      |     |   |    |      |  |   |    |      |  |   |    |      |        |  |     |      |     |   |      |      |  |   |      |      |  |   |      |      |        |  |     |      |     |   |      |      |  |   |      |      |  |   |      |      |        |  |     |      |     |   |    |      |  |   |     |      |  |   |     |      |        |  |    |      |     |   |    |      |  |   |    |      |  |   |    |      |        |  |   |      |      |   |    |    |  |   |    |      |  |   |    |      |
|                                                                                                                                                                                                                                                                                                                                                                               | T                                                                                                                                                                                                                                                                                                                                                                                                                                                                                                                                                                                                                                                                                                                                                                                                                                                                                                                                                                                                                                                                                                                            | 227                                                                                                                                                                                                                                                                                                                                                                                                                                                                                                                                                                                                                                                                                                                                                                                                                                                                                                                                                                                                                                                                                                                                                                                                                                                                                                                                                                                                                                                              | 0.88   |  |     |      |     |   |    |      |  |   |    |      |  |   |    |      |        |  |     |      |     |   |      |      |  |   |      |      |  |   |      |      |        |  |     |      |     |   |      |      |  |   |      |      |  |   |      |      |        |  |     |      |     |   |    |      |  |   |     |      |  |   |     |      |        |  |    |      |     |   |    |      |  |   |    |      |  |   |    |      |        |  |   |      |      |   |    |    |  |   |    |      |  |   |    |      |
| Target                                                                                                                                                                                                                                                                                                                                                                        |                                                                                                                                                                                                                                                                                                                                                                                                                                                                                                                                                                                                                                                                                                                                                                                                                                                                                                                                                                                                                                                                                                                              | 14                                                                                                                                                                                                                                                                                                                                                                                                                                                                                                                                                                                                                                                                                                                                                                                                                                                                                                                                                                                                                                                                                                                                                                                                                                                                                                                                                                                                                                                               | 0.91   |  |     |      |     |   |    |      |  |   |    |      |  |   |    |      |        |  |     |      |     |   |      |      |  |   |      |      |  |   |      |      |        |  |     |      |     |   |      |      |  |   |      |      |  |   |      |      |        |  |     |      |     |   |    |      |  |   |     |      |  |   |     |      |        |  |    |      |     |   |    |      |  |   |    |      |  |   |    |      |        |  |   |      |      |   |    |    |  |   |    |      |  |   |    |      |
| +7G                                                                                                                                                                                                                                                                                                                                                                           | A                                                                                                                                                                                                                                                                                                                                                                                                                                                                                                                                                                                                                                                                                                                                                                                                                                                                                                                                                                                                                                                                                                                            | 13                                                                                                                                                                                                                                                                                                                                                                                                                                                                                                                                                                                                                                                                                                                                                                                                                                                                                                                                                                                                                                                                                                                                                                                                                                                                                                                                                                                                                                                               | 0.89   |  |     |      |     |   |    |      |  |   |    |      |  |   |    |      |        |  |     |      |     |   |      |      |  |   |      |      |  |   |      |      |        |  |     |      |     |   |      |      |  |   |      |      |  |   |      |      |        |  |     |      |     |   |    |      |  |   |     |      |  |   |     |      |        |  |    |      |     |   |    |      |  |   |    |      |  |   |    |      |        |  |   |      |      |   |    |    |  |   |    |      |  |   |    |      |
|                                                                                                                                                                                                                                                                                                                                                                               | C                                                                                                                                                                                                                                                                                                                                                                                                                                                                                                                                                                                                                                                                                                                                                                                                                                                                                                                                                                                                                                                                                                                            | 12                                                                                                                                                                                                                                                                                                                                                                                                                                                                                                                                                                                                                                                                                                                                                                                                                                                                                                                                                                                                                                                                                                                                                                                                                                                                                                                                                                                                                                                               | 0.90   |  |     |      |     |   |    |      |  |   |    |      |  |   |    |      |        |  |     |      |     |   |      |      |  |   |      |      |  |   |      |      |        |  |     |      |     |   |      |      |  |   |      |      |  |   |      |      |        |  |     |      |     |   |    |      |  |   |     |      |  |   |     |      |        |  |    |      |     |   |    |      |  |   |    |      |  |   |    |      |        |  |   |      |      |   |    |    |  |   |    |      |  |   |    |      |
|                                                                                                                                                                                                                                                                                                                                                                               | T                                                                                                                                                                                                                                                                                                                                                                                                                                                                                                                                                                                                                                                                                                                                                                                                                                                                                                                                                                                                                                                                                                                            | 10                                                                                                                                                                                                                                                                                                                                                                                                                                                                                                                                                                                                                                                                                                                                                                                                                                                                                                                                                                                                                                                                                                                                                                                                                                                                                                                                                                                                                                                               | 0.88   |  |     |      |     |   |    |      |  |   |    |      |  |   |    |      |        |  |     |      |     |   |      |      |  |   |      |      |  |   |      |      |        |  |     |      |     |   |      |      |  |   |      |      |  |   |      |      |        |  |     |      |     |   |    |      |  |   |     |      |  |   |     |      |        |  |    |      |     |   |    |      |  |   |    |      |  |   |    |      |        |  |   |      |      |   |    |    |  |   |    |      |  |   |    |      |
| Target                                                                                                                                                                                                                                                                                                                                                                        |                                                                                                                                                                                                                                                                                                                                                                                                                                                                                                                                                                                                                                                                                                                                                                                                                                                                                                                                                                                                                                                                                                                              | 14                                                                                                                                                                                                                                                                                                                                                                                                                                                                                                                                                                                                                                                                                                                                                                                                                                                                                                                                                                                                                                                                                                                                                                                                                                                                                                                                                                                                                                                               | 0.91   |  |     |      |     |   |    |      |  |   |    |      |  |   |    |      |        |  |     |      |     |   |      |      |  |   |      |      |  |   |      |      |        |  |     |      |     |   |      |      |  |   |      |      |  |   |      |      |        |  |     |      |     |   |    |      |  |   |     |      |  |   |     |      |        |  |    |      |     |   |    |      |  |   |    |      |  |   |    |      |        |  |   |      |      |   |    |    |  |   |    |      |  |   |    |      |
| +9C                                                                                                                                                                                                                                                                                                                                                                           | A                                                                                                                                                                                                                                                                                                                                                                                                                                                                                                                                                                                                                                                                                                                                                                                                                                                                                                                                                                                                                                                                                                                            | 21                                                                                                                                                                                                                                                                                                                                                                                                                                                                                                                                                                                                                                                                                                                                                                                                                                                                                                                                                                                                                                                                                                                                                                                                                                                                                                                                                                                                                                                               | 0.86   |  |     |      |     |   |    |      |  |   |    |      |  |   |    |      |        |  |     |      |     |   |      |      |  |   |      |      |  |   |      |      |        |  |     |      |     |   |      |      |  |   |      |      |  |   |      |      |        |  |     |      |     |   |    |      |  |   |     |      |  |   |     |      |        |  |    |      |     |   |    |      |  |   |    |      |  |   |    |      |        |  |   |      |      |   |    |    |  |   |    |      |  |   |    |      |
|                                                                                                                                                                                                                                                                                                                                                                               | G                                                                                                                                                                                                                                                                                                                                                                                                                                                                                                                                                                                                                                                                                                                                                                                                                                                                                                                                                                                                                                                                                                                            | 49                                                                                                                                                                                                                                                                                                                                                                                                                                                                                                                                                                                                                                                                                                                                                                                                                                                                                                                                                                                                                                                                                                                                                                                                                                                                                                                                                                                                                                                               | 0.82   |  |     |      |     |   |    |      |  |   |    |      |  |   |    |      |        |  |     |      |     |   |      |      |  |   |      |      |  |   |      |      |        |  |     |      |     |   |      |      |  |   |      |      |  |   |      |      |        |  |     |      |     |   |    |      |  |   |     |      |  |   |     |      |        |  |    |      |     |   |    |      |  |   |    |      |  |   |    |      |        |  |   |      |      |   |    |    |  |   |    |      |  |   |    |      |
|                                                                                                                                                                                                                                                                                                                                                                               | T                                                                                                                                                                                                                                                                                                                                                                                                                                                                                                                                                                                                                                                                                                                                                                                                                                                                                                                                                                                                                                                                                                                            | 20                                                                                                                                                                                                                                                                                                                                                                                                                                                                                                                                                                                                                                                                                                                                                                                                                                                                                                                                                                                                                                                                                                                                                                                                                                                                                                                                                                                                                                                               | 0.84   |  |     |      |     |   |    |      |  |   |    |      |  |   |    |      |        |  |     |      |     |   |      |      |  |   |      |      |  |   |      |      |        |  |     |      |     |   |      |      |  |   |      |      |  |   |      |      |        |  |     |      |     |   |    |      |  |   |     |      |  |   |     |      |        |  |    |      |     |   |    |      |  |   |    |      |  |   |    |      |        |  |   |      |      |   |    |    |  |   |    |      |  |   |    |      |
| <p>CPK2_C3, S152C, K155R, L156K, Y162H, I164V, S166K, D168S, T189S, Y192G, K200R, K202D, T204A</p>                                                                                                                                                                                                                                                                            | <p>Library 9</p> <pre> 3of7 CRKHVKS SSGEP FRDA 1of14 CRKSETEHVK SSGRDA 1of14 CRKSPESRHVK SSGRDA 1of14 CRKSP EWAHVK SSGRDA 1of14 CRKCP ETGHVK SSGRDA 1of14 CRKSI ENGHVK SSGRDA 1of14 CRKAI ESEHVK SSGRDA 1of14 CRKAL ESRHVK SSGRDA 1of14 CRKAV ESRHVK SSGRDA 1of14 CRKAP ESSHVK SSGRDA 1of14 CRKSL ESSHVK SSGRDA 1of14 CRKSR ESSHVK SSGRDA 1of14 CRKSV ESSHVK SSGRDA 1of14 CRKAL ESHHVK SSGRDA 1of14 CRKAL ESHHVK SSGRDA </pre> <p>Library 10</p> <pre> 3of7 CRKHVKS SSGEP FRDA 1of7 CRKHVKS SSGEP LRDA 1of7 CRKHVKS SSGDLRDA 1of7 CRKHVKS SSGDNFRDA 1of7 CRKHVKS SSGEGFRDA </pre> <p>Library 11</p> <pre> 7of24 CRKHVKS SSGDRDA 5of24 CRKHVKS SSGDRDA 3of24 CRKHVKS SSGYDRDA 3of24 CRKHVKS SSGHDRDA 2of24 CRKHVKS SSGCDRDA 1of24 CRKHVKS SSGVDRDA 1of24 CRKHVKS SSGYMRDA 1of24 CRKHVKS SSGDRDA 1of24 CRKHVKS SSGYCRDA </pre> <p>Libraries 9-11 showed the importance of keeping K200R and D194D (Library 11), that A170 should be A or G and C198 should be hydrophobic (Library 10), and that there is a preferred sequence for loop 157-161 (Library 9)</p> <p>The tested proteins C_1 to C_3 were from libraries 6-8.</p> | <p>Library 9 had a survival of 0.67, and library 10 had a survival of 0.29</p> <table border="1"> <tr><td>Target</td><td></td><td>9</td><td>0.94</td></tr> <tr><td>+1A</td><td>C</td><td>8</td><td>0.90</td></tr> <tr><td></td><td>G</td><td>NA</td><td>NA</td></tr> <tr><td></td><td>T</td><td>9</td><td>0.87</td></tr> <tr><td>Target</td><td></td><td>9</td><td>0.94</td></tr> <tr><td>+4G</td><td>A</td><td>7</td><td>0.84</td></tr> <tr><td></td><td>C</td><td>29</td><td>0.75</td></tr> <tr><td></td><td>T</td><td>9</td><td>0.96</td></tr> <tr><td>Target</td><td></td><td>9</td><td>0.94</td></tr> <tr><td>+5G</td><td>A</td><td>11</td><td>0.89</td></tr> <tr><td></td><td>C</td><td>15</td><td>0.83</td></tr> <tr><td></td><td>T</td><td>10</td><td>0.93</td></tr> <tr><td>Target</td><td></td><td>9</td><td>0.94</td></tr> <tr><td>+7G</td><td>A</td><td>8</td><td>0.91</td></tr> <tr><td></td><td>C</td><td>8</td><td>0.92</td></tr> <tr><td></td><td>T</td><td>6</td><td>0.88</td></tr> <tr><td>Target</td><td></td><td>9</td><td>0.94</td></tr> <tr><td>+9C</td><td>A</td><td>9</td><td>0.91</td></tr> <tr><td></td><td>G</td><td>11</td><td>0.91</td></tr> <tr><td></td><td>T</td><td>8</td><td>0.86</td></tr> <tr><td>Target</td><td></td><td>9</td><td>0.94</td></tr> <tr><td>+10C</td><td>A</td><td>NA</td><td>NA</td></tr> <tr><td></td><td>G</td><td>33</td><td>0.88</td></tr> <tr><td></td><td>T</td><td>20</td><td>0.84</td></tr> </table> | Target |  | 9   | 0.94 | +1A | C | 8  | 0.90 |  | G | NA | NA   |  | T | 9  | 0.87 | Target |  | 9   | 0.94 | +4G | A | 7    | 0.84 |  | C | 29   | 0.75 |  | T | 9    | 0.96 | Target |  | 9   | 0.94 | +5G | A | 11   | 0.89 |  | C | 15   | 0.83 |  | T | 10   | 0.93 | Target |  | 9   | 0.94 | +7G | A | 8  | 0.91 |  | C | 8   | 0.92 |  | T | 6   | 0.88 | Target |  | 9  | 0.94 | +9C | A | 9  | 0.91 |  | G | 11 | 0.91 |  | T | 8  | 0.86 | Target |  | 9 | 0.94 | +10C | A | NA | NA |  | G | 33 | 0.88 |  | T | 20 | 0.84 |
| Target                                                                                                                                                                                                                                                                                                                                                                        |                                                                                                                                                                                                                                                                                                                                                                                                                                                                                                                                                                                                                                                                                                                                                                                                                                                                                                                                                                                                                                                                                                                              | 9                                                                                                                                                                                                                                                                                                                                                                                                                                                                                                                                                                                                                                                                                                                                                                                                                                                                                                                                                                                                                                                                                                                                                                                                                                                                                                                                                                                                                                                                | 0.94   |  |     |      |     |   |    |      |  |   |    |      |  |   |    |      |        |  |     |      |     |   |      |      |  |   |      |      |  |   |      |      |        |  |     |      |     |   |      |      |  |   |      |      |  |   |      |      |        |  |     |      |     |   |    |      |  |   |     |      |  |   |     |      |        |  |    |      |     |   |    |      |  |   |    |      |  |   |    |      |        |  |   |      |      |   |    |    |  |   |    |      |  |   |    |      |
| +1A                                                                                                                                                                                                                                                                                                                                                                           | C                                                                                                                                                                                                                                                                                                                                                                                                                                                                                                                                                                                                                                                                                                                                                                                                                                                                                                                                                                                                                                                                                                                            | 8                                                                                                                                                                                                                                                                                                                                                                                                                                                                                                                                                                                                                                                                                                                                                                                                                                                                                                                                                                                                                                                                                                                                                                                                                                                                                                                                                                                                                                                                | 0.90   |  |     |      |     |   |    |      |  |   |    |      |  |   |    |      |        |  |     |      |     |   |      |      |  |   |      |      |  |   |      |      |        |  |     |      |     |   |      |      |  |   |      |      |  |   |      |      |        |  |     |      |     |   |    |      |  |   |     |      |  |   |     |      |        |  |    |      |     |   |    |      |  |   |    |      |  |   |    |      |        |  |   |      |      |   |    |    |  |   |    |      |  |   |    |      |
|                                                                                                                                                                                                                                                                                                                                                                               | G                                                                                                                                                                                                                                                                                                                                                                                                                                                                                                                                                                                                                                                                                                                                                                                                                                                                                                                                                                                                                                                                                                                            | NA                                                                                                                                                                                                                                                                                                                                                                                                                                                                                                                                                                                                                                                                                                                                                                                                                                                                                                                                                                                                                                                                                                                                                                                                                                                                                                                                                                                                                                                               | NA     |  |     |      |     |   |    |      |  |   |    |      |  |   |    |      |        |  |     |      |     |   |      |      |  |   |      |      |  |   |      |      |        |  |     |      |     |   |      |      |  |   |      |      |  |   |      |      |        |  |     |      |     |   |    |      |  |   |     |      |  |   |     |      |        |  |    |      |     |   |    |      |  |   |    |      |  |   |    |      |        |  |   |      |      |   |    |    |  |   |    |      |  |   |    |      |
|                                                                                                                                                                                                                                                                                                                                                                               | T                                                                                                                                                                                                                                                                                                                                                                                                                                                                                                                                                                                                                                                                                                                                                                                                                                                                                                                                                                                                                                                                                                                            | 9                                                                                                                                                                                                                                                                                                                                                                                                                                                                                                                                                                                                                                                                                                                                                                                                                                                                                                                                                                                                                                                                                                                                                                                                                                                                                                                                                                                                                                                                | 0.87   |  |     |      |     |   |    |      |  |   |    |      |  |   |    |      |        |  |     |      |     |   |      |      |  |   |      |      |  |   |      |      |        |  |     |      |     |   |      |      |  |   |      |      |  |   |      |      |        |  |     |      |     |   |    |      |  |   |     |      |  |   |     |      |        |  |    |      |     |   |    |      |  |   |    |      |  |   |    |      |        |  |   |      |      |   |    |    |  |   |    |      |  |   |    |      |
| Target                                                                                                                                                                                                                                                                                                                                                                        |                                                                                                                                                                                                                                                                                                                                                                                                                                                                                                                                                                                                                                                                                                                                                                                                                                                                                                                                                                                                                                                                                                                              | 9                                                                                                                                                                                                                                                                                                                                                                                                                                                                                                                                                                                                                                                                                                                                                                                                                                                                                                                                                                                                                                                                                                                                                                                                                                                                                                                                                                                                                                                                | 0.94   |  |     |      |     |   |    |      |  |   |    |      |  |   |    |      |        |  |     |      |     |   |      |      |  |   |      |      |  |   |      |      |        |  |     |      |     |   |      |      |  |   |      |      |  |   |      |      |        |  |     |      |     |   |    |      |  |   |     |      |  |   |     |      |        |  |    |      |     |   |    |      |  |   |    |      |  |   |    |      |        |  |   |      |      |   |    |    |  |   |    |      |  |   |    |      |
| +4G                                                                                                                                                                                                                                                                                                                                                                           | A                                                                                                                                                                                                                                                                                                                                                                                                                                                                                                                                                                                                                                                                                                                                                                                                                                                                                                                                                                                                                                                                                                                            | 7                                                                                                                                                                                                                                                                                                                                                                                                                                                                                                                                                                                                                                                                                                                                                                                                                                                                                                                                                                                                                                                                                                                                                                                                                                                                                                                                                                                                                                                                | 0.84   |  |     |      |     |   |    |      |  |   |    |      |  |   |    |      |        |  |     |      |     |   |      |      |  |   |      |      |  |   |      |      |        |  |     |      |     |   |      |      |  |   |      |      |  |   |      |      |        |  |     |      |     |   |    |      |  |   |     |      |  |   |     |      |        |  |    |      |     |   |    |      |  |   |    |      |  |   |    |      |        |  |   |      |      |   |    |    |  |   |    |      |  |   |    |      |
|                                                                                                                                                                                                                                                                                                                                                                               | C                                                                                                                                                                                                                                                                                                                                                                                                                                                                                                                                                                                                                                                                                                                                                                                                                                                                                                                                                                                                                                                                                                                            | 29                                                                                                                                                                                                                                                                                                                                                                                                                                                                                                                                                                                                                                                                                                                                                                                                                                                                                                                                                                                                                                                                                                                                                                                                                                                                                                                                                                                                                                                               | 0.75   |  |     |      |     |   |    |      |  |   |    |      |  |   |    |      |        |  |     |      |     |   |      |      |  |   |      |      |  |   |      |      |        |  |     |      |     |   |      |      |  |   |      |      |  |   |      |      |        |  |     |      |     |   |    |      |  |   |     |      |  |   |     |      |        |  |    |      |     |   |    |      |  |   |    |      |  |   |    |      |        |  |   |      |      |   |    |    |  |   |    |      |  |   |    |      |
|                                                                                                                                                                                                                                                                                                                                                                               | T                                                                                                                                                                                                                                                                                                                                                                                                                                                                                                                                                                                                                                                                                                                                                                                                                                                                                                                                                                                                                                                                                                                            | 9                                                                                                                                                                                                                                                                                                                                                                                                                                                                                                                                                                                                                                                                                                                                                                                                                                                                                                                                                                                                                                                                                                                                                                                                                                                                                                                                                                                                                                                                | 0.96   |  |     |      |     |   |    |      |  |   |    |      |  |   |    |      |        |  |     |      |     |   |      |      |  |   |      |      |  |   |      |      |        |  |     |      |     |   |      |      |  |   |      |      |  |   |      |      |        |  |     |      |     |   |    |      |  |   |     |      |  |   |     |      |        |  |    |      |     |   |    |      |  |   |    |      |  |   |    |      |        |  |   |      |      |   |    |    |  |   |    |      |  |   |    |      |
| Target                                                                                                                                                                                                                                                                                                                                                                        |                                                                                                                                                                                                                                                                                                                                                                                                                                                                                                                                                                                                                                                                                                                                                                                                                                                                                                                                                                                                                                                                                                                              | 9                                                                                                                                                                                                                                                                                                                                                                                                                                                                                                                                                                                                                                                                                                                                                                                                                                                                                                                                                                                                                                                                                                                                                                                                                                                                                                                                                                                                                                                                | 0.94   |  |     |      |     |   |    |      |  |   |    |      |  |   |    |      |        |  |     |      |     |   |      |      |  |   |      |      |  |   |      |      |        |  |     |      |     |   |      |      |  |   |      |      |  |   |      |      |        |  |     |      |     |   |    |      |  |   |     |      |  |   |     |      |        |  |    |      |     |   |    |      |  |   |    |      |  |   |    |      |        |  |   |      |      |   |    |    |  |   |    |      |  |   |    |      |
| +5G                                                                                                                                                                                                                                                                                                                                                                           | A                                                                                                                                                                                                                                                                                                                                                                                                                                                                                                                                                                                                                                                                                                                                                                                                                                                                                                                                                                                                                                                                                                                            | 11                                                                                                                                                                                                                                                                                                                                                                                                                                                                                                                                                                                                                                                                                                                                                                                                                                                                                                                                                                                                                                                                                                                                                                                                                                                                                                                                                                                                                                                               | 0.89   |  |     |      |     |   |    |      |  |   |    |      |  |   |    |      |        |  |     |      |     |   |      |      |  |   |      |      |  |   |      |      |        |  |     |      |     |   |      |      |  |   |      |      |  |   |      |      |        |  |     |      |     |   |    |      |  |   |     |      |  |   |     |      |        |  |    |      |     |   |    |      |  |   |    |      |  |   |    |      |        |  |   |      |      |   |    |    |  |   |    |      |  |   |    |      |
|                                                                                                                                                                                                                                                                                                                                                                               | C                                                                                                                                                                                                                                                                                                                                                                                                                                                                                                                                                                                                                                                                                                                                                                                                                                                                                                                                                                                                                                                                                                                            | 15                                                                                                                                                                                                                                                                                                                                                                                                                                                                                                                                                                                                                                                                                                                                                                                                                                                                                                                                                                                                                                                                                                                                                                                                                                                                                                                                                                                                                                                               | 0.83   |  |     |      |     |   |    |      |  |   |    |      |  |   |    |      |        |  |     |      |     |   |      |      |  |   |      |      |  |   |      |      |        |  |     |      |     |   |      |      |  |   |      |      |  |   |      |      |        |  |     |      |     |   |    |      |  |   |     |      |  |   |     |      |        |  |    |      |     |   |    |      |  |   |    |      |  |   |    |      |        |  |   |      |      |   |    |    |  |   |    |      |  |   |    |      |
|                                                                                                                                                                                                                                                                                                                                                                               | T                                                                                                                                                                                                                                                                                                                                                                                                                                                                                                                                                                                                                                                                                                                                                                                                                                                                                                                                                                                                                                                                                                                            | 10                                                                                                                                                                                                                                                                                                                                                                                                                                                                                                                                                                                                                                                                                                                                                                                                                                                                                                                                                                                                                                                                                                                                                                                                                                                                                                                                                                                                                                                               | 0.93   |  |     |      |     |   |    |      |  |   |    |      |  |   |    |      |        |  |     |      |     |   |      |      |  |   |      |      |  |   |      |      |        |  |     |      |     |   |      |      |  |   |      |      |  |   |      |      |        |  |     |      |     |   |    |      |  |   |     |      |  |   |     |      |        |  |    |      |     |   |    |      |  |   |    |      |  |   |    |      |        |  |   |      |      |   |    |    |  |   |    |      |  |   |    |      |
| Target                                                                                                                                                                                                                                                                                                                                                                        |                                                                                                                                                                                                                                                                                                                                                                                                                                                                                                                                                                                                                                                                                                                                                                                                                                                                                                                                                                                                                                                                                                                              | 9                                                                                                                                                                                                                                                                                                                                                                                                                                                                                                                                                                                                                                                                                                                                                                                                                                                                                                                                                                                                                                                                                                                                                                                                                                                                                                                                                                                                                                                                | 0.94   |  |     |      |     |   |    |      |  |   |    |      |  |   |    |      |        |  |     |      |     |   |      |      |  |   |      |      |  |   |      |      |        |  |     |      |     |   |      |      |  |   |      |      |  |   |      |      |        |  |     |      |     |   |    |      |  |   |     |      |  |   |     |      |        |  |    |      |     |   |    |      |  |   |    |      |  |   |    |      |        |  |   |      |      |   |    |    |  |   |    |      |  |   |    |      |
| +7G                                                                                                                                                                                                                                                                                                                                                                           | A                                                                                                                                                                                                                                                                                                                                                                                                                                                                                                                                                                                                                                                                                                                                                                                                                                                                                                                                                                                                                                                                                                                            | 8                                                                                                                                                                                                                                                                                                                                                                                                                                                                                                                                                                                                                                                                                                                                                                                                                                                                                                                                                                                                                                                                                                                                                                                                                                                                                                                                                                                                                                                                | 0.91   |  |     |      |     |   |    |      |  |   |    |      |  |   |    |      |        |  |     |      |     |   |      |      |  |   |      |      |  |   |      |      |        |  |     |      |     |   |      |      |  |   |      |      |  |   |      |      |        |  |     |      |     |   |    |      |  |   |     |      |  |   |     |      |        |  |    |      |     |   |    |      |  |   |    |      |  |   |    |      |        |  |   |      |      |   |    |    |  |   |    |      |  |   |    |      |
|                                                                                                                                                                                                                                                                                                                                                                               | C                                                                                                                                                                                                                                                                                                                                                                                                                                                                                                                                                                                                                                                                                                                                                                                                                                                                                                                                                                                                                                                                                                                            | 8                                                                                                                                                                                                                                                                                                                                                                                                                                                                                                                                                                                                                                                                                                                                                                                                                                                                                                                                                                                                                                                                                                                                                                                                                                                                                                                                                                                                                                                                | 0.92   |  |     |      |     |   |    |      |  |   |    |      |  |   |    |      |        |  |     |      |     |   |      |      |  |   |      |      |  |   |      |      |        |  |     |      |     |   |      |      |  |   |      |      |  |   |      |      |        |  |     |      |     |   |    |      |  |   |     |      |  |   |     |      |        |  |    |      |     |   |    |      |  |   |    |      |  |   |    |      |        |  |   |      |      |   |    |    |  |   |    |      |  |   |    |      |
|                                                                                                                                                                                                                                                                                                                                                                               | T                                                                                                                                                                                                                                                                                                                                                                                                                                                                                                                                                                                                                                                                                                                                                                                                                                                                                                                                                                                                                                                                                                                            | 6                                                                                                                                                                                                                                                                                                                                                                                                                                                                                                                                                                                                                                                                                                                                                                                                                                                                                                                                                                                                                                                                                                                                                                                                                                                                                                                                                                                                                                                                | 0.88   |  |     |      |     |   |    |      |  |   |    |      |  |   |    |      |        |  |     |      |     |   |      |      |  |   |      |      |  |   |      |      |        |  |     |      |     |   |      |      |  |   |      |      |  |   |      |      |        |  |     |      |     |   |    |      |  |   |     |      |  |   |     |      |        |  |    |      |     |   |    |      |  |   |    |      |  |   |    |      |        |  |   |      |      |   |    |    |  |   |    |      |  |   |    |      |
| Target                                                                                                                                                                                                                                                                                                                                                                        |                                                                                                                                                                                                                                                                                                                                                                                                                                                                                                                                                                                                                                                                                                                                                                                                                                                                                                                                                                                                                                                                                                                              | 9                                                                                                                                                                                                                                                                                                                                                                                                                                                                                                                                                                                                                                                                                                                                                                                                                                                                                                                                                                                                                                                                                                                                                                                                                                                                                                                                                                                                                                                                | 0.94   |  |     |      |     |   |    |      |  |   |    |      |  |   |    |      |        |  |     |      |     |   |      |      |  |   |      |      |  |   |      |      |        |  |     |      |     |   |      |      |  |   |      |      |  |   |      |      |        |  |     |      |     |   |    |      |  |   |     |      |  |   |     |      |        |  |    |      |     |   |    |      |  |   |    |      |  |   |    |      |        |  |   |      |      |   |    |    |  |   |    |      |  |   |    |      |
| +9C                                                                                                                                                                                                                                                                                                                                                                           | A                                                                                                                                                                                                                                                                                                                                                                                                                                                                                                                                                                                                                                                                                                                                                                                                                                                                                                                                                                                                                                                                                                                            | 9                                                                                                                                                                                                                                                                                                                                                                                                                                                                                                                                                                                                                                                                                                                                                                                                                                                                                                                                                                                                                                                                                                                                                                                                                                                                                                                                                                                                                                                                | 0.91   |  |     |      |     |   |    |      |  |   |    |      |  |   |    |      |        |  |     |      |     |   |      |      |  |   |      |      |  |   |      |      |        |  |     |      |     |   |      |      |  |   |      |      |  |   |      |      |        |  |     |      |     |   |    |      |  |   |     |      |  |   |     |      |        |  |    |      |     |   |    |      |  |   |    |      |  |   |    |      |        |  |   |      |      |   |    |    |  |   |    |      |  |   |    |      |
|                                                                                                                                                                                                                                                                                                                                                                               | G                                                                                                                                                                                                                                                                                                                                                                                                                                                                                                                                                                                                                                                                                                                                                                                                                                                                                                                                                                                                                                                                                                                            | 11                                                                                                                                                                                                                                                                                                                                                                                                                                                                                                                                                                                                                                                                                                                                                                                                                                                                                                                                                                                                                                                                                                                                                                                                                                                                                                                                                                                                                                                               | 0.91   |  |     |      |     |   |    |      |  |   |    |      |  |   |    |      |        |  |     |      |     |   |      |      |  |   |      |      |  |   |      |      |        |  |     |      |     |   |      |      |  |   |      |      |  |   |      |      |        |  |     |      |     |   |    |      |  |   |     |      |  |   |     |      |        |  |    |      |     |   |    |      |  |   |    |      |  |   |    |      |        |  |   |      |      |   |    |    |  |   |    |      |  |   |    |      |
|                                                                                                                                                                                                                                                                                                                                                                               | T                                                                                                                                                                                                                                                                                                                                                                                                                                                                                                                                                                                                                                                                                                                                                                                                                                                                                                                                                                                                                                                                                                                            | 8                                                                                                                                                                                                                                                                                                                                                                                                                                                                                                                                                                                                                                                                                                                                                                                                                                                                                                                                                                                                                                                                                                                                                                                                                                                                                                                                                                                                                                                                | 0.86   |  |     |      |     |   |    |      |  |   |    |      |  |   |    |      |        |  |     |      |     |   |      |      |  |   |      |      |  |   |      |      |        |  |     |      |     |   |      |      |  |   |      |      |  |   |      |      |        |  |     |      |     |   |    |      |  |   |     |      |  |   |     |      |        |  |    |      |     |   |    |      |  |   |    |      |  |   |    |      |        |  |   |      |      |   |    |    |  |   |    |      |  |   |    |      |
| Target                                                                                                                                                                                                                                                                                                                                                                        |                                                                                                                                                                                                                                                                                                                                                                                                                                                                                                                                                                                                                                                                                                                                                                                                                                                                                                                                                                                                                                                                                                                              | 9                                                                                                                                                                                                                                                                                                                                                                                                                                                                                                                                                                                                                                                                                                                                                                                                                                                                                                                                                                                                                                                                                                                                                                                                                                                                                                                                                                                                                                                                | 0.94   |  |     |      |     |   |    |      |  |   |    |      |  |   |    |      |        |  |     |      |     |   |      |      |  |   |      |      |  |   |      |      |        |  |     |      |     |   |      |      |  |   |      |      |  |   |      |      |        |  |     |      |     |   |    |      |  |   |     |      |  |   |     |      |        |  |    |      |     |   |    |      |  |   |    |      |  |   |    |      |        |  |   |      |      |   |    |    |  |   |    |      |  |   |    |      |
| +10C                                                                                                                                                                                                                                                                                                                                                                          | A                                                                                                                                                                                                                                                                                                                                                                                                                                                                                                                                                                                                                                                                                                                                                                                                                                                                                                                                                                                                                                                                                                                            | NA                                                                                                                                                                                                                                                                                                                                                                                                                                                                                                                                                                                                                                                                                                                                                                                                                                                                                                                                                                                                                                                                                                                                                                                                                                                                                                                                                                                                                                                               | NA     |  |     |      |     |   |    |      |  |   |    |      |  |   |    |      |        |  |     |      |     |   |      |      |  |   |      |      |  |   |      |      |        |  |     |      |     |   |      |      |  |   |      |      |  |   |      |      |        |  |     |      |     |   |    |      |  |   |     |      |  |   |     |      |        |  |    |      |     |   |    |      |  |   |    |      |  |   |    |      |        |  |   |      |      |   |    |    |  |   |    |      |  |   |    |      |
|                                                                                                                                                                                                                                                                                                                                                                               | G                                                                                                                                                                                                                                                                                                                                                                                                                                                                                                                                                                                                                                                                                                                                                                                                                                                                                                                                                                                                                                                                                                                            | 33                                                                                                                                                                                                                                                                                                                                                                                                                                                                                                                                                                                                                                                                                                                                                                                                                                                                                                                                                                                                                                                                                                                                                                                                                                                                                                                                                                                                                                                               | 0.88   |  |     |      |     |   |    |      |  |   |    |      |  |   |    |      |        |  |     |      |     |   |      |      |  |   |      |      |  |   |      |      |        |  |     |      |     |   |      |      |  |   |      |      |  |   |      |      |        |  |     |      |     |   |    |      |  |   |     |      |  |   |     |      |        |  |    |      |     |   |    |      |  |   |    |      |  |   |    |      |        |  |   |      |      |   |    |    |  |   |    |      |  |   |    |      |
|                                                                                                                                                                                                                                                                                                                                                                               | T                                                                                                                                                                                                                                                                                                                                                                                                                                                                                                                                                                                                                                                                                                                                                                                                                                                                                                                                                                                                                                                                                                                            | 20                                                                                                                                                                                                                                                                                                                                                                                                                                                                                                                                                                                                                                                                                                                                                                                                                                                                                                                                                                                                                                                                                                                                                                                                                                                                                                                                                                                                                                                               | 0.84   |  |     |      |     |   |    |      |  |   |    |      |  |   |    |      |        |  |     |      |     |   |      |      |  |   |      |      |  |   |      |      |        |  |     |      |     |   |      |      |  |   |      |      |  |   |      |      |        |  |     |      |     |   |    |      |  |   |     |      |  |   |     |      |        |  |    |      |     |   |    |      |  |   |    |      |  |   |    |      |        |  |   |      |      |   |    |    |  |   |    |      |  |   |    |      |
| <p>FAH1313_Ccc, +5C and +6C pocket, S152T, S166G, T189P, Y192K, K202L</p>                                                                                                                                                                                                                                                                                                     | <p>S152DYC, Y154TRS, S166GBC, D168GAS, T189MCC, T192MRG, K200HWG</p> <p>152, 166, 189, 192, 200 (154 and 168 stayed wild-type, Y and D)</p> <pre> 4of9 TGPRL 1of9 SGPR L 2of4 TGP K L 2of9 TAP K L 1of9 TSP K L 2of4 TGP R L 1of9 AGP R L </pre>                                                                                                                                                                                                                                                                                                                                                                                                                                                                                                                                                                                                                                                                                                                                                                                                                                                                             | <p>Survival for one selection was 0.33, for the other it was 0.48. They were both from the same library.</p> <table border="1"> <tr><td>Target</td><td></td><td>117</td><td>0.80</td></tr> <tr><td>+3C</td><td>A</td><td>NA</td><td>NA</td></tr> <tr><td></td><td>G</td><td>85</td><td>0.95</td></tr> <tr><td></td><td>T</td><td>15</td><td>0.84</td></tr> <tr><td>Target</td><td></td><td>117</td><td>0.80</td></tr> <tr><td>+5C</td><td>A</td><td>&gt;750</td><td>NA</td></tr> <tr><td></td><td>G</td><td>&gt;750</td><td>NA</td></tr> <tr><td></td><td>T</td><td>&gt;750</td><td>NA</td></tr> <tr><td>Target</td><td></td><td>117</td><td>0.80</td></tr> <tr><td>+6C</td><td>A</td><td>&gt;750</td><td>NA</td></tr> <tr><td></td><td>G</td><td>&gt;750</td><td>NA</td></tr> <tr><td></td><td>T</td><td>&gt;750</td><td>NA</td></tr> <tr><td>Target</td><td></td><td>117</td><td>0.80</td></tr> <tr><td>+9G</td><td>A</td><td>27</td><td>0.87</td></tr> <tr><td></td><td>C</td><td>234</td><td>0.29</td></tr> <tr><td></td><td>T</td><td>110</td><td>0.79</td></tr> </table>                                                                                                                                                                                                                                                                                                                                                                                   | Target |  | 117 | 0.80 | +3C | A | NA | NA   |  | G | 85 | 0.95 |  | T | 15 | 0.84 | Target |  | 117 | 0.80 | +5C | A | >750 | NA   |  | G | >750 | NA   |  | T | >750 | NA   | Target |  | 117 | 0.80 | +6C | A | >750 | NA   |  | G | >750 | NA   |  | T | >750 | NA   | Target |  | 117 | 0.80 | +9G | A | 27 | 0.87 |  | C | 234 | 0.29 |  | T | 110 | 0.79 |        |  |    |      |     |   |    |      |  |   |    |      |  |   |    |      |        |  |   |      |      |   |    |    |  |   |    |      |  |   |    |      |
| Target                                                                                                                                                                                                                                                                                                                                                                        |                                                                                                                                                                                                                                                                                                                                                                                                                                                                                                                                                                                                                                                                                                                                                                                                                                                                                                                                                                                                                                                                                                                              | 117                                                                                                                                                                                                                                                                                                                                                                                                                                                                                                                                                                                                                                                                                                                                                                                                                                                                                                                                                                                                                                                                                                                                                                                                                                                                                                                                                                                                                                                              | 0.80   |  |     |      |     |   |    |      |  |   |    |      |  |   |    |      |        |  |     |      |     |   |      |      |  |   |      |      |  |   |      |      |        |  |     |      |     |   |      |      |  |   |      |      |  |   |      |      |        |  |     |      |     |   |    |      |  |   |     |      |  |   |     |      |        |  |    |      |     |   |    |      |  |   |    |      |  |   |    |      |        |  |   |      |      |   |    |    |  |   |    |      |  |   |    |      |
| +3C                                                                                                                                                                                                                                                                                                                                                                           | A                                                                                                                                                                                                                                                                                                                                                                                                                                                                                                                                                                                                                                                                                                                                                                                                                                                                                                                                                                                                                                                                                                                            | NA                                                                                                                                                                                                                                                                                                                                                                                                                                                                                                                                                                                                                                                                                                                                                                                                                                                                                                                                                                                                                                                                                                                                                                                                                                                                                                                                                                                                                                                               | NA     |  |     |      |     |   |    |      |  |   |    |      |  |   |    |      |        |  |     |      |     |   |      |      |  |   |      |      |  |   |      |      |        |  |     |      |     |   |      |      |  |   |      |      |  |   |      |      |        |  |     |      |     |   |    |      |  |   |     |      |  |   |     |      |        |  |    |      |     |   |    |      |  |   |    |      |  |   |    |      |        |  |   |      |      |   |    |    |  |   |    |      |  |   |    |      |
|                                                                                                                                                                                                                                                                                                                                                                               | G                                                                                                                                                                                                                                                                                                                                                                                                                                                                                                                                                                                                                                                                                                                                                                                                                                                                                                                                                                                                                                                                                                                            | 85                                                                                                                                                                                                                                                                                                                                                                                                                                                                                                                                                                                                                                                                                                                                                                                                                                                                                                                                                                                                                                                                                                                                                                                                                                                                                                                                                                                                                                                               | 0.95   |  |     |      |     |   |    |      |  |   |    |      |  |   |    |      |        |  |     |      |     |   |      |      |  |   |      |      |  |   |      |      |        |  |     |      |     |   |      |      |  |   |      |      |  |   |      |      |        |  |     |      |     |   |    |      |  |   |     |      |  |   |     |      |        |  |    |      |     |   |    |      |  |   |    |      |  |   |    |      |        |  |   |      |      |   |    |    |  |   |    |      |  |   |    |      |
|                                                                                                                                                                                                                                                                                                                                                                               | T                                                                                                                                                                                                                                                                                                                                                                                                                                                                                                                                                                                                                                                                                                                                                                                                                                                                                                                                                                                                                                                                                                                            | 15                                                                                                                                                                                                                                                                                                                                                                                                                                                                                                                                                                                                                                                                                                                                                                                                                                                                                                                                                                                                                                                                                                                                                                                                                                                                                                                                                                                                                                                               | 0.84   |  |     |      |     |   |    |      |  |   |    |      |  |   |    |      |        |  |     |      |     |   |      |      |  |   |      |      |  |   |      |      |        |  |     |      |     |   |      |      |  |   |      |      |  |   |      |      |        |  |     |      |     |   |    |      |  |   |     |      |  |   |     |      |        |  |    |      |     |   |    |      |  |   |    |      |  |   |    |      |        |  |   |      |      |   |    |    |  |   |    |      |  |   |    |      |
| Target                                                                                                                                                                                                                                                                                                                                                                        |                                                                                                                                                                                                                                                                                                                                                                                                                                                                                                                                                                                                                                                                                                                                                                                                                                                                                                                                                                                                                                                                                                                              | 117                                                                                                                                                                                                                                                                                                                                                                                                                                                                                                                                                                                                                                                                                                                                                                                                                                                                                                                                                                                                                                                                                                                                                                                                                                                                                                                                                                                                                                                              | 0.80   |  |     |      |     |   |    |      |  |   |    |      |  |   |    |      |        |  |     |      |     |   |      |      |  |   |      |      |  |   |      |      |        |  |     |      |     |   |      |      |  |   |      |      |  |   |      |      |        |  |     |      |     |   |    |      |  |   |     |      |  |   |     |      |        |  |    |      |     |   |    |      |  |   |    |      |  |   |    |      |        |  |   |      |      |   |    |    |  |   |    |      |  |   |    |      |
| +5C                                                                                                                                                                                                                                                                                                                                                                           | A                                                                                                                                                                                                                                                                                                                                                                                                                                                                                                                                                                                                                                                                                                                                                                                                                                                                                                                                                                                                                                                                                                                            | >750                                                                                                                                                                                                                                                                                                                                                                                                                                                                                                                                                                                                                                                                                                                                                                                                                                                                                                                                                                                                                                                                                                                                                                                                                                                                                                                                                                                                                                                             | NA     |  |     |      |     |   |    |      |  |   |    |      |  |   |    |      |        |  |     |      |     |   |      |      |  |   |      |      |  |   |      |      |        |  |     |      |     |   |      |      |  |   |      |      |  |   |      |      |        |  |     |      |     |   |    |      |  |   |     |      |  |   |     |      |        |  |    |      |     |   |    |      |  |   |    |      |  |   |    |      |        |  |   |      |      |   |    |    |  |   |    |      |  |   |    |      |
|                                                                                                                                                                                                                                                                                                                                                                               | G                                                                                                                                                                                                                                                                                                                                                                                                                                                                                                                                                                                                                                                                                                                                                                                                                                                                                                                                                                                                                                                                                                                            | >750                                                                                                                                                                                                                                                                                                                                                                                                                                                                                                                                                                                                                                                                                                                                                                                                                                                                                                                                                                                                                                                                                                                                                                                                                                                                                                                                                                                                                                                             | NA     |  |     |      |     |   |    |      |  |   |    |      |  |   |    |      |        |  |     |      |     |   |      |      |  |   |      |      |  |   |      |      |        |  |     |      |     |   |      |      |  |   |      |      |  |   |      |      |        |  |     |      |     |   |    |      |  |   |     |      |  |   |     |      |        |  |    |      |     |   |    |      |  |   |    |      |  |   |    |      |        |  |   |      |      |   |    |    |  |   |    |      |  |   |    |      |
|                                                                                                                                                                                                                                                                                                                                                                               | T                                                                                                                                                                                                                                                                                                                                                                                                                                                                                                                                                                                                                                                                                                                                                                                                                                                                                                                                                                                                                                                                                                                            | >750                                                                                                                                                                                                                                                                                                                                                                                                                                                                                                                                                                                                                                                                                                                                                                                                                                                                                                                                                                                                                                                                                                                                                                                                                                                                                                                                                                                                                                                             | NA     |  |     |      |     |   |    |      |  |   |    |      |  |   |    |      |        |  |     |      |     |   |      |      |  |   |      |      |  |   |      |      |        |  |     |      |     |   |      |      |  |   |      |      |  |   |      |      |        |  |     |      |     |   |    |      |  |   |     |      |  |   |     |      |        |  |    |      |     |   |    |      |  |   |    |      |  |   |    |      |        |  |   |      |      |   |    |    |  |   |    |      |  |   |    |      |
| Target                                                                                                                                                                                                                                                                                                                                                                        |                                                                                                                                                                                                                                                                                                                                                                                                                                                                                                                                                                                                                                                                                                                                                                                                                                                                                                                                                                                                                                                                                                                              | 117                                                                                                                                                                                                                                                                                                                                                                                                                                                                                                                                                                                                                                                                                                                                                                                                                                                                                                                                                                                                                                                                                                                                                                                                                                                                                                                                                                                                                                                              | 0.80   |  |     |      |     |   |    |      |  |   |    |      |  |   |    |      |        |  |     |      |     |   |      |      |  |   |      |      |  |   |      |      |        |  |     |      |     |   |      |      |  |   |      |      |  |   |      |      |        |  |     |      |     |   |    |      |  |   |     |      |  |   |     |      |        |  |    |      |     |   |    |      |  |   |    |      |  |   |    |      |        |  |   |      |      |   |    |    |  |   |    |      |  |   |    |      |
| +6C                                                                                                                                                                                                                                                                                                                                                                           | A                                                                                                                                                                                                                                                                                                                                                                                                                                                                                                                                                                                                                                                                                                                                                                                                                                                                                                                                                                                                                                                                                                                            | >750                                                                                                                                                                                                                                                                                                                                                                                                                                                                                                                                                                                                                                                                                                                                                                                                                                                                                                                                                                                                                                                                                                                                                                                                                                                                                                                                                                                                                                                             | NA     |  |     |      |     |   |    |      |  |   |    |      |  |   |    |      |        |  |     |      |     |   |      |      |  |   |      |      |  |   |      |      |        |  |     |      |     |   |      |      |  |   |      |      |  |   |      |      |        |  |     |      |     |   |    |      |  |   |     |      |  |   |     |      |        |  |    |      |     |   |    |      |  |   |    |      |  |   |    |      |        |  |   |      |      |   |    |    |  |   |    |      |  |   |    |      |
|                                                                                                                                                                                                                                                                                                                                                                               | G                                                                                                                                                                                                                                                                                                                                                                                                                                                                                                                                                                                                                                                                                                                                                                                                                                                                                                                                                                                                                                                                                                                            | >750                                                                                                                                                                                                                                                                                                                                                                                                                                                                                                                                                                                                                                                                                                                                                                                                                                                                                                                                                                                                                                                                                                                                                                                                                                                                                                                                                                                                                                                             | NA     |  |     |      |     |   |    |      |  |   |    |      |  |   |    |      |        |  |     |      |     |   |      |      |  |   |      |      |  |   |      |      |        |  |     |      |     |   |      |      |  |   |      |      |  |   |      |      |        |  |     |      |     |   |    |      |  |   |     |      |  |   |     |      |        |  |    |      |     |   |    |      |  |   |    |      |  |   |    |      |        |  |   |      |      |   |    |    |  |   |    |      |  |   |    |      |
|                                                                                                                                                                                                                                                                                                                                                                               | T                                                                                                                                                                                                                                                                                                                                                                                                                                                                                                                                                                                                                                                                                                                                                                                                                                                                                                                                                                                                                                                                                                                            | >750                                                                                                                                                                                                                                                                                                                                                                                                                                                                                                                                                                                                                                                                                                                                                                                                                                                                                                                                                                                                                                                                                                                                                                                                                                                                                                                                                                                                                                                             | NA     |  |     |      |     |   |    |      |  |   |    |      |  |   |    |      |        |  |     |      |     |   |      |      |  |   |      |      |  |   |      |      |        |  |     |      |     |   |      |      |  |   |      |      |  |   |      |      |        |  |     |      |     |   |    |      |  |   |     |      |  |   |     |      |        |  |    |      |     |   |    |      |  |   |    |      |  |   |    |      |        |  |   |      |      |   |    |    |  |   |    |      |  |   |    |      |
| Target                                                                                                                                                                                                                                                                                                                                                                        |                                                                                                                                                                                                                                                                                                                                                                                                                                                                                                                                                                                                                                                                                                                                                                                                                                                                                                                                                                                                                                                                                                                              | 117                                                                                                                                                                                                                                                                                                                                                                                                                                                                                                                                                                                                                                                                                                                                                                                                                                                                                                                                                                                                                                                                                                                                                                                                                                                                                                                                                                                                                                                              | 0.80   |  |     |      |     |   |    |      |  |   |    |      |  |   |    |      |        |  |     |      |     |   |      |      |  |   |      |      |  |   |      |      |        |  |     |      |     |   |      |      |  |   |      |      |  |   |      |      |        |  |     |      |     |   |    |      |  |   |     |      |  |   |     |      |        |  |    |      |     |   |    |      |  |   |    |      |  |   |    |      |        |  |   |      |      |   |    |    |  |   |    |      |  |   |    |      |
| +9G                                                                                                                                                                                                                                                                                                                                                                           | A                                                                                                                                                                                                                                                                                                                                                                                                                                                                                                                                                                                                                                                                                                                                                                                                                                                                                                                                                                                                                                                                                                                            | 27                                                                                                                                                                                                                                                                                                                                                                                                                                                                                                                                                                                                                                                                                                                                                                                                                                                                                                                                                                                                                                                                                                                                                                                                                                                                                                                                                                                                                                                               | 0.87   |  |     |      |     |   |    |      |  |   |    |      |  |   |    |      |        |  |     |      |     |   |      |      |  |   |      |      |  |   |      |      |        |  |     |      |     |   |      |      |  |   |      |      |  |   |      |      |        |  |     |      |     |   |    |      |  |   |     |      |  |   |     |      |        |  |    |      |     |   |    |      |  |   |    |      |  |   |    |      |        |  |   |      |      |   |    |    |  |   |    |      |  |   |    |      |
|                                                                                                                                                                                                                                                                                                                                                                               | C                                                                                                                                                                                                                                                                                                                                                                                                                                                                                                                                                                                                                                                                                                                                                                                                                                                                                                                                                                                                                                                                                                                            | 234                                                                                                                                                                                                                                                                                                                                                                                                                                                                                                                                                                                                                                                                                                                                                                                                                                                                                                                                                                                                                                                                                                                                                                                                                                                                                                                                                                                                                                                              | 0.29   |  |     |      |     |   |    |      |  |   |    |      |  |   |    |      |        |  |     |      |     |   |      |      |  |   |      |      |  |   |      |      |        |  |     |      |     |   |      |      |  |   |      |      |  |   |      |      |        |  |     |      |     |   |    |      |  |   |     |      |  |   |     |      |        |  |    |      |     |   |    |      |  |   |    |      |  |   |    |      |        |  |   |      |      |   |    |    |  |   |    |      |  |   |    |      |
|                                                                                                                                                                                                                                                                                                                                                                               | T                                                                                                                                                                                                                                                                                                                                                                                                                                                                                                                                                                                                                                                                                                                                                                                                                                                                                                                                                                                                                                                                                                                            | 110                                                                                                                                                                                                                                                                                                                                                                                                                                                                                                                                                                                                                                                                                                                                                                                                                                                                                                                                                                                                                                                                                                                                                                                                                                                                                                                                                                                                                                                              | 0.79   |  |     |      |     |   |    |      |  |   |    |      |  |   |    |      |        |  |     |      |     |   |      |      |  |   |      |      |  |   |      |      |        |  |     |      |     |   |      |      |  |   |      |      |  |   |      |      |        |  |     |      |     |   |    |      |  |   |     |      |  |   |     |      |        |  |    |      |     |   |    |      |  |   |    |      |  |   |    |      |        |  |   |      |      |   |    |    |  |   |    |      |  |   |    |      |

|                                            |                                                                                                                                                                                                                                                                                                                                                                                                                                                                |                                |           |                                                                                                                              |
|--------------------------------------------|----------------------------------------------------------------------------------------------------------------------------------------------------------------------------------------------------------------------------------------------------------------------------------------------------------------------------------------------------------------------------------------------------------------------------------------------------------------|--------------------------------|-----------|------------------------------------------------------------------------------------------------------------------------------|
| +3C_S1 with +1/+3/+5 substrates            | Substrates are labeled 1-4. 1=+3C, 2=+1G/+3C, 3=+3C/+5G, and 4=+1G/+3C/+5G This data is associated with Figure 5. The kinetics section is shown as $k_{cat}/K_M$ values to show the individual components of the measure.                                                                                                                                                                                                                                      | 1                              | 178       | ~1                                                                                                                           |
|                                            |                                                                                                                                                                                                                                                                                                                                                                                                                                                                | 2                              | 65        | ~1                                                                                                                           |
|                                            |                                                                                                                                                                                                                                                                                                                                                                                                                                                                | 3                              | 197       | 0.56                                                                                                                         |
|                                            |                                                                                                                                                                                                                                                                                                                                                                                                                                                                | 4                              | 312       | ~1                                                                                                                           |
|                                            |                                                                                                                                                                                                                                                                                                                                                                                                                                                                | 1                              | 324       | ~1                                                                                                                           |
| +3C_S2 with +1/+3/+5 substrates            |                                                                                                                                                                                                                                                                                                                                                                                                                                                                | 2                              | 75        | ~1                                                                                                                           |
|                                            |                                                                                                                                                                                                                                                                                                                                                                                                                                                                | 3                              | 432       | 0.36                                                                                                                         |
|                                            |                                                                                                                                                                                                                                                                                                                                                                                                                                                                | 4                              | 585       | 0.39                                                                                                                         |
|                                            |                                                                                                                                                                                                                                                                                                                                                                                                                                                                | 1                              | 1.1/294   | NA                                                                                                                           |
| +3C_S1 kinetics with +1/+3/+5 substrates   |                                                                                                                                                                                                                                                                                                                                                                                                                                                                | 2                              | 3.6/95    | NA                                                                                                                           |
|                                            |                                                                                                                                                                                                                                                                                                                                                                                                                                                                | 3                              | 0.10/72   | NA                                                                                                                           |
|                                            |                                                                                                                                                                                                                                                                                                                                                                                                                                                                | 4                              | 0.18/256  | NA                                                                                                                           |
|                                            | 1                                                                                                                                                                                                                                                                                                                                                                                                                                                              | 0.11/33                        | NA        |                                                                                                                              |
| Y2 kinetics with +1/+3/+5 substrates       | 2                                                                                                                                                                                                                                                                                                                                                                                                                                                              | 2.0/71                         | NA        |                                                                                                                              |
|                                            | 3                                                                                                                                                                                                                                                                                                                                                                                                                                                              | 0.17/6                         | NA        |                                                                                                                              |
|                                            | 4                                                                                                                                                                                                                                                                                                                                                                                                                                                              | 0.14/84                        | NA        |                                                                                                                              |
|                                            | SV                                                                                                                                                                                                                                                                                                                                                                                                                                                             | -4C C1: Y18C, G33K, R59T, A68R | -4T       | 97                                                                                                                           |
| SV2                                        | -4C C2: Y18C, G33K, R59S                                                                                                                                                                                                                                                                                                                                                                                                                                       | -4T                            | 226/58    | ~1/~1                                                                                                                        |
| SV                                         | -4C C1: Y18C, G33K, R59T, A68R                                                                                                                                                                                                                                                                                                                                                                                                                                 | AGAP004671 (-)                 | 270/199   | ~1/~1                                                                                                                        |
| SV2                                        | -4C C2: Y18C, G33K, R59S                                                                                                                                                                                                                                                                                                                                                                                                                                       | AGAP004671 (-)                 | 1392/1866 | ~1/~1                                                                                                                        |
| Untested AGAP004671 (-) half-site variants | These loop libraries were built in the context of SV2, which we know now is a very poor cutter of the (-) half-site. These sequences should be retested in the context of the alternative variant (-4C_C1). The survival was <1% against the entire (-) half-site. These loops were additionally tested in the context of E63E/I64N/E65R from a loop library over the -2 position, but the length and sequence of this loop should also be further randomized. |                                |           | <pre> wt_23to27 - K K G K Y 5of14 M Q R S K A 3of14 C Q R G K A 2of14 S Q Q A K A 2of14 D K D R K A 2of14 Y H D R K A </pre> |
| HV                                         | S152V, D168S, T189V, K200H, T204R                                                                                                                                                                                                                                                                                                                                                                                                                              | AGAP004671 (+)                 | 50/43     | 0.96/0.94                                                                                                                    |
| Human Cells HV                             | L156D, D168S, T189V, K200H, T204R                                                                                                                                                                                                                                                                                                                                                                                                                              | AGAP004671 (+)                 | NA        | NA                                                                                                                           |
| Notes on AGAP004671 (+)                    | The sequence used in enzyme assays (Figure 6) was selected for the highly similar AGAP003225 (+) half-site. The sequence specific to AGAP004671 (+) is the version that was tested in human cells (Figure S9, and see above row). Selection survival is 72%.                                                                                                                                                                                                   |                                |           |                                                                                                                              |
| SV                                         | +3G S1: A170K, Y192G, K200V                                                                                                                                                                                                                                                                                                                                                                                                                                    | +3G                            | 240/420   | 0.83/0.73                                                                                                                    |
| SV                                         | +3G S1: A170K, Y192G, K200V                                                                                                                                                                                                                                                                                                                                                                                                                                    | AGAP009607 (+)                 | 197/175   | 0.82/0.82                                                                                                                    |
| SV                                         | -3A S1: Y13W, E35A, 58-65 = LRQHDRG-                                                                                                                                                                                                                                                                                                                                                                                                                           | -3A                            | 177       | ~1                                                                                                                           |
| SV                                         | +3C S1: A170E, D194K, K200A                                                                                                                                                                                                                                                                                                                                                                                                                                    | +3C                            | 145/153   | ~1/~1                                                                                                                        |
| SV                                         | +3C S1: A170E, D194K, K200A                                                                                                                                                                                                                                                                                                                                                                                                                                    | AGAP010417 (+)                 | 318/298   | 0.82/0.77                                                                                                                    |
| SV                                         | -3C C2: Y18W, E35K, 58-65 = FRPDG---                                                                                                                                                                                                                                                                                                                                                                                                                           | -3C                            | 6.6/4.6   | 0.98/~1                                                                                                                      |
| SV                                         | -3C C2: Y18W, E35K, 58-65 = FRPDG---                                                                                                                                                                                                                                                                                                                                                                                                                           | AGAP003225 (-)                 | 7.4/7.3   | 0.98/1                                                                                                                       |
| HV                                         | S152V, D168S, T189V, K200H, T204R                                                                                                                                                                                                                                                                                                                                                                                                                              | AGAP003225 (+)                 | 24/20     | 0.91/0.91                                                                                                                    |
| Human Cells HV                             | S152V, D168S, T189V, K200H, T204R                                                                                                                                                                                                                                                                                                                                                                                                                              | AGAP003225 (+)                 | NA        | NA                                                                                                                           |
| AGAP003225 FV                              | Y18W, E35K, 58-65 = TRPDG---, S152T, D168S, T189V, K200H, T204R, and base mutations to provide stability/activity, but not specificity: F13Y, K49D, I53V, I55V, S79N, I81L, E86D, F91I, S92T, R102K, S111Y, L112S, L232K                                                                                                                                                                                                                                       | EC <sub>1/2max</sub>           | 121/141   | 0.92/0.93                                                                                                                    |
| CPK2 FV                                    | Y18C, T22S, E31R, G33K, R59T, A68H, R70E, S152C, 155-168: RKALESSHLVAKFS, T189S, Y192S, D194I, T196R, C198I, K200R, K202D, T204A, and same base mutations as AGAP003225                                                                                                                                                                                                                                                                                        | EC <sub>1/2max</sub>           | 1185/1204 | ~1/~1                                                                                                                        |
|                                            |                                                                                                                                                                                                                                                                                                                                                                                                                                                                | $K_M$                          | >3,000    | NA                                                                                                                           |
|                                            |                                                                                                                                                                                                                                                                                                                                                                                                                                                                | $k_{cat}$                      | >5        | NA                                                                                                                           |
| notes on AGAP009607 (-)                    | Need to determine whether -4C_C1 and/or -4C_C2 can cleave -5G/-4C. Then the mutations for -8G_P1 (K24N, T29K) need to be combined with -4C mutations. This variant should cleave all (-) half substitutions except -10C, requiring loop remodeling.                                                                                                                                                                                                            |                                |           |                                                                                                                              |
| notes on AGAP009607 (+)                    | A sequence similar to the tested single variant +3G_S1 showed survival of 32%. This sequence was A170K, D194A, C198A, K200C.                                                                                                                                                                                                                                                                                                                                   |                                |           |                                                                                                                              |
| notes on AGAP010417                        | Surprisingly, the +3C_S1 variant cleaves the (+) half-site more poorly than the +3C base alone. This is surprising because we also showed that +3C_S1 cleaves +1G/+3C better than +3C (Figure 5). Therefore, good cleavage of this half-site likely needs randomization over the third substitution, +9C.                                                                                                                                                      |                                |           |                                                                                                                              |
| notes on AGAP008878 (-)                    | Need to determine whether -3T_S1 can cleave -3T/-2C. Then the mutations for -8T_P1 (K24N, T29Q) need to be combined with the -3T_S1 sequence. This variant should cleave all (-) half substitutions except for -10G, requiring loop remodeling.                                                                                                                                                                                                                |                                |           |                                                                                                                              |
| notes on AGAP008878 (+)                    | This site includes the +4G/+5G substitutions in the CPK2 (+) half-site. It is cleaved with 50-100% survival by variations of the enzyme for this pocket. The variant showing up the most often in libraries based on the CPK2 information is: S152C, L156R, I164F, S166K, D168G, Y192V, K200R, K202D                                                                                                                                                           |                                |           |                                                                                                                              |
| notes on AGAP002800 (-)                    | Combining -8G_P1 and -3C_C2 will almost certainly yield a highly active variant for this entire half-site, as -5T is cleaved as well as the wild-type nucleotide at position -5.                                                                                                                                                                                                                                                                               |                                |           |                                                                                                                              |
| notes on AGAP002800 (+)                    | Need to determine whether any of the variants the cleave +4T can tolerate +5C. Additionally, the +1C central four substitutions may result in unexpected specificity preferences.                                                                                                                                                                                                                                                                              |                                |           |                                                                                                                              |
| Y192I with +6 substrates                   | This data is associated with Figures S10 and S11 and Supplementary Discussion B. The kinetics section is shown as $k_{cat}/K_M$ values to show the individual components of the measure. The Y2 kinetic data is from Thyme, et al, Nature 2009.                                                                                                                                                                                                                | Target                         | 0.049/28  | NA                                                                                                                           |
|                                            |                                                                                                                                                                                                                                                                                                                                                                                                                                                                | +6A C                          | 3.13/168  | NA                                                                                                                           |
|                                            |                                                                                                                                                                                                                                                                                                                                                                                                                                                                | G                              | 5.59/170  | NA                                                                                                                           |
|                                            |                                                                                                                                                                                                                                                                                                                                                                                                                                                                | T                              | 0.11/68   | NA                                                                                                                           |
